# Supplementary material for: Dynamic and Static Nature of XH-∗-π and YX-∗-π (X = F, Cl, Br, and I; Y = X and F) in the Distorted π-System of Corannulene Elucidated with QTAIM Dual Functional Analysis
Source: MDPI journal article supplement (doi:10.3390/molecules28104219), 2023-05-21
Supplement: s1 [file s1]

## Supporting Information

### Dynamic and Static Nature of XH-\* $\pi$ and YX-\* $\pi$ (X = F, Cl, Br and I; Y = X and F) in Distorted $\pi$ -System of Corannulene Elucidated with QTAIM Dual Functional Analysis

Satoko Hayashi, \* Takahiro Kato, Yuji Sugibayashi, and Waro Nakanishi\*

*Faculty of Systems Engineering, Wakayama University, 930 Sakaedani, Wakayama 640-8510, Japan. Fax: +81 73 457 8272; Tel: +81 73 457 8252; E-mail: hayashi3@sys.wakayama-u.ac.jp and nakanisi@sys.wakayama-u.ac.jp.*

#### Table of Contents

**Scheme S1.** Classification of interactions by the signs of  $\nabla^2\rho_b(\mathbf{r}_c)$  and  $H_b(\mathbf{r}_c)$ , together with  $G_b(\mathbf{r}_c)$  and  $V_b(\mathbf{r}_c)$ . S4

**Scheme S2.** QTAIM-DFA: Plot of  $H_b(\mathbf{r}_c)$  versus  $H_b(\mathbf{r}_c) - V_b(\mathbf{r}_c)/2$  for Weak to Strong Interactions. S4

**Scheme S3.** Rough classification and characterization of interactions by  $\theta$  and  $\theta_p$ , together with  $k_b(\mathbf{r}_c)$  ( $= V_b(\mathbf{r}_c)/G_b(\mathbf{r}_c)$ ). S6

**Scheme S4.** Convex and concave sides of corannulene and definition of structural types of B-A--- $\pi(\text{C}_{20}\text{H}_{10})$ , to be clarified, where (A, B) = (H, X), (X, X), or (X, F) (X = F, Cl, Br and I) with structural parameters. S10

**Table S1.** Proposed definitions for the classification and characterization of interactions by the signs  $H_b(\mathbf{r}_c)$  and  $H_b(\mathbf{r}_c) - V_b(\mathbf{r}_c)/2$  and their first derivatives, together with the tentatively proposed definitions by the characteristic points on the plots of  $H_b(\mathbf{r}_c)$  versus  $H_b(\mathbf{r}_c) - V_b(\mathbf{r}_c)/2$ . S8

**Table S2.** The structural parameters for X-H-\* $\pi(\text{C}_{20}\text{H}_{10})$  and Y-X-\* $\pi(\text{C}_{20}\text{H}_{10})$  (X, Y = F, Cl, Br and I), evaluated with MP2/BSS-A. S11

**Table S3.**  $\Delta E_{\text{ES}}$  and  $\Delta E_{\text{ZP}}$  in X-H-\* $\pi(\text{C}_{20}\text{H}_{10})$  and Y-X-\* $\pi(\text{C}_{20}\text{H}_{10})$  (X, Y = F, Cl, Br and I), evaluated with MP2/BSS-A, together with  $E(2)$ , calculated with the NBO analysis under M06-2X/BSS-A//MP2/BSS-A. S12

**Table S4.** The  $r_{\text{BP}}$  and  $R_{\text{SL}}$  values evaluated with MP2/BSS-A for the optimized and observed structures of B-A-\* $\pi(\text{C}_{20}\text{H}_{10})$ , together with the  $\Delta r_{\text{BP}}$  values. S13

**Table S5.** The  $r_{\text{BP}}$  and  $R_{\text{SL}}$  values evaluated with MP2/BSS-A for the optimized and observed structures of B-A-\* $\pi(\text{C}_{20}\text{H}_{10})$ , together with the  $\Delta r_{\text{BP}}$  values. S14

**Table S6.** The structural parameters for the H-\* $\pi$  and X-\* $\pi$  interactions with  $\pi(\text{C}_{20}\text{H}_{10})$ ,  $\pi(\text{C}_{24}\text{H}_{12})$  and  $\pi(\text{C}_6\text{H}_6)$ , (X = F, Cl, Br and I), evaluated with MP2/BSS-A, together with the values from the corresponding ones of the adducts with  $\pi(\text{C}_6\text{H}_6)$ , respectively. S15

**Table S7.** QTAIM functions and QTAIM-DFA parameters for  $X-H-\pi(C_{20}H_{10})$  and  $Y-X-\pi(C_{20}H_{10})$  ( $X, Y = F, Cl, Br$ , and  $I$ ) on concave side, evaluated with MP2/BSS-A. S16

**Table S8.**  $C_{ii}$  and  $\Delta E$  for  $X-H-\pi(C_{20}H_{10})$  and  $Y-X-\pi(C_{20}H_{10})$  ( $X, Y = F, Cl, Br$ , and  $I$ ), evaluated with MP2/BSS-A,<sup>a</sup> employing the perturbed structures generated with CIV. S17

**Table S9.** QTAIM functions and QTAIM-DFA parameters for  $X-H-\pi(C_{20}H_{10})$  and  $Y-X-\pi(C_{20}H_{10})$  ( $X, Y = F, Cl, Br$  and  $I$ ) ( $C_{5v}$ ), evaluated with MP2/BSS-A. S18

**Table S10.** QTAIM functions and QTAIM-DFA parameters for  $X-H-\pi(C_{24}H_{12})$  and  $Y-X-\pi(C_{24}H_{12})$  ( $X, Y = F, Cl, Br$ , and  $I$ ) ( $C_{6v}$ ), evaluated with MP2/BSS-A. S19

**Table S11.** QTAIM functions and QTAIM-DFA parameters for  $X-H-\pi(C_6H_6)$  and  $Y-X-\pi(C_6H_6)$  ( $X, Y = F, Cl, Br$  and  $I$ ) ( $C_{6v}$ ), evaluated with MP2/BSS-A. S19

**Table S12.**  $\Delta E_{ES}$  for  $X-H-\pi$  and  $Y-X-\pi$  adducts with  $\pi(C_{20}H_{10})$ ,  $\pi(C_{24}H_{12})$  and  $\pi(C_6H_6)$  ( $X, Y = F, Cl, Br$  and  $I$ ) (type ID), evaluated with MP2/BSS-A, together with those differences  $\Delta\Delta E_{ES}$ . S20

**Figure S1.** Polar ( $R, \theta$ ) coordinate representation of  $H_b(r_c)$  versus  $H_b(r_c) - V_b(r_c)/2$ , with  $(\theta_p, \kappa_p)$  parameters. S5

**Figure S2.** Plot of  $H_b(r_c)$  versus  $w$  in  $r(^1Cl-^2Cl) = r_o(^1Cl-^2Cl) + wa_o$  for  $^1Cl-^2Cl-^3Cl^-$  (a) with the magnified picture of (a) (b) and that of  $H_b(r_c) - V_b(r_c)/2$  versus  $w$  (c). S7

**Figure S3.** Plots of  $\Delta E_{ZP}$  versus  $\Delta E_{ES}$  for the optimized structures of  $B-A-\pi(C_{20}H_{10})$ , evaluated with MP2/BSS-A. S21

**Figure S4.** Plot of  $r_{BP}(r_1)$  versus  $R_{SL}(r_1)$  for the optimized structures of  $B-A-\pi(C_{20}H_{10})$  with MP2/BSS-A. S21

**Figure S5.** Molecular graphs for  $X-H-\pi(C_{20}H_{10})$ ,  $X-X-\pi(C_{20}H_{10})$  and  $F-X-\pi(C_{20}H_{10})$  at cv side, evaluated with BSS-A:  $F-H-\pi(C_{20}H_{10})$  ( $C_{5v}$ : type ID<sub>Cora:cv</sub>),  $Cl-H-\pi(C_{20}H_{10})$  ( $C_{5v}$ : type ID<sub>Cora:cv</sub>),  $Br-H-\pi(C_{20}H_{10})$  ( $C_{5v}$ : type ID<sub>Cora:cv</sub>),  $I-H-\pi(C_{20}H_{10})$  ( $C_{5v}$ : type ID<sub>Cora:cv</sub>),  $F-F-\pi(C_{20}H_{10})$  ( $C_{5v}$ : type ID<sub>Cora:cv</sub>),  $Cl-Cl-\pi(C_{20}H_{10})$  ( $C_{5v}$ : type ID<sub>Cora:cv</sub>),  $Br-Br-\pi(C_{20}H_{10})$  ( $C_{5v}$ : type ID<sub>Cora:cv</sub>),  $I-I-\pi(C_{20}H_{10})$  ( $C_{5v}$ : type ID<sub>Cora:cv</sub>),  $F-Cl-\pi(C_{20}H_{10})$  ( $C_{5v}$ : type ID<sub>Cora:cv</sub>),  $F-Br-\pi(C_{20}H_{10})$  ( $C_{5v}$ : type ID<sub>Cora:cv</sub>) and  $F-I-\pi(C_{20}H_{10})$  ( $C_{5v}$ : type ID<sub>Cora:cv</sub>). S22

**Figure S6.** Molecular graphs for  $X-H-\pi(C_{20}H_{10})$ ,  $X-X-\pi(C_{20}H_{10})$  and  $F-X-\pi(C_{20}H_{10})$  at cc side, evaluated with BSS-A:  $F-H-\pi(C_{20}H_{10})$  ( $C_{5v}$ : type ID<sub>Cora:cc</sub>),  $Cl-H-\pi(C_{20}H_{10})$  ( $C_{5v}$ : type ID<sub>Cora:cc</sub>),  $Br-H-\pi(C_{20}H_{10})$  ( $C_{5v}$ : type ID<sub>Cora:cc</sub>),  $I-H-\pi(C_{20}H_{10})$  ( $C_{5v}$ : type ID<sub>Cora:cc</sub>),  $F-F-\pi(C_{20}H_{10})$  ( $C_{5v}$ : type ID<sub>Cora:cc</sub>),  $Cl-Cl-\pi(C_{20}H_{10})$  ( $C_{5v}$ : type ID<sub>Cora:cc</sub>),  $Br-Br-\pi(C_{20}H_{10})$  ( $C_{5v}$ : type ID<sub>Cora:cc</sub>),  $I-I-\pi(C_{20}H_{10})$  ( $C_{5v}$ : type ID<sub>Cora:cc</sub>),  $F-Cl-\pi(C_{20}H_{10})$  ( $C_{5v}$ : type ID<sub>Cora:cc</sub>),  $F-Br-\pi(C_{20}H_{10})$  ( $C_{5v}$ : type ID<sub>Cora:cc</sub>) and  $F-I-\pi(C_{20}H_{10})$  ( $C_{5v}$ : type ID<sub>Cora:cc</sub>). S23

**Figure S7.** Plot of  $\theta_p$  for NIV versus  $\theta_p$  for CIV for the optimized structures of  $B-A-\pi(C_{20}H_{10})$  with MP2/BSS-A.  $F-H-\pi(^aC)$  ( $C_1$ : IA<sub>Cora:cv</sub>),  $Cl-H-\pi(^aC)$  ( $C_s$ : IIA<sub>Cora:cc</sub>), and  $Br-H-\pi(^aC)$  ( $C_1$ : IIA<sub>Cora:cc</sub>) are omitted. S24

Computation information and geometries of compounds

S25–S71

## QTAIM Dual Functional Analysis (QTAIM-DFA)

The bond critical point (BCP; \*) is an important concept in QTAIM. The BCP of  $(\omega, \sigma) = (3, -1)$  [38,39] is a point along the bond path (BP) at the interatomic surface, where charge density  $\rho(\mathbf{r})$  reaches a minimum. It is donated by  $\rho_b(\mathbf{r}_c)$ , so are other QTAIM functions, such as the total electron energy densities  $H_b(\mathbf{r}_c)$ , potential energy densities  $V_b(\mathbf{r}_c)$  and kinetic energy densities  $G_b(\mathbf{r}_c)$  at the BCPs. A chemical bond or interaction between A and B is denoted by A–B, which corresponds to the BP between A and B in QTAIM. We will use A-\*B for BP, where the asterisk emphasizes the presence of a BCP in A–B.

The sign of the Laplacian  $\rho_b(\mathbf{r}_c)$  ( $\nabla^2 \rho_b(\mathbf{r}_c)$ ) indicates that  $\rho_b(\mathbf{r}_c)$  is depleted or concentrated with respect to its surrounding, since  $\nabla^2 \rho_b(\mathbf{r}_c)$  is the second derivative of  $\rho_b(\mathbf{r}_c)$ .  $\rho_b(\mathbf{r}_c)$  is locally depleted relative to the average distribution around  $\mathbf{r}_c$  if  $\nabla^2 \rho_b(\mathbf{r}_c) > 0$ , but it is concentrated when  $\nabla^2 \rho_b(\mathbf{r}_c) < 0$ . Total electron energy densities at BCPs ( $H_b(\mathbf{r}_c)$ ) must be a more appropriate measure for weak interactions on the energy basis [35–37,38,39,56–69].  $H_b(\mathbf{r}_c)$  are the sum of kinetic energy densities ( $G_b(\mathbf{r}_c)$ ) and potential energy densities ( $V_b(\mathbf{r}_c)$ ) at BCPs, as shown in Equation (S1). Electrons at BCPs are stabilized when  $H_b(\mathbf{r}_c) < 0$ , therefore, interactions exhibit the covalent nature in this region, whereas they exhibit no covalency if  $H_b(\mathbf{r}_c) > 0$ , due to the destabilization of electrons at BCPs under the conditions [38,39]. Equation (S2) represents the relation between  $\nabla^2 \rho_b(\mathbf{r}_c)$  and  $H_b(\mathbf{r}_c)$ , together with  $G_b(\mathbf{r}_c)$  and  $V_b(\mathbf{r}_c)$ , which is closely related to the virial theorem.

$$H_b(\mathbf{r}_c) = G_b(\mathbf{r}_c) + V_b(\mathbf{r}_c) \quad (\text{S1})$$

$$(\hbar^2/8m)\nabla^2 \rho_b(\mathbf{r}_c) = H_b(\mathbf{r}_c) - V_b(\mathbf{r}_c)/2 \quad (\text{S2})$$

$$= G_b(\mathbf{r}_c) + V_b(\mathbf{r}_c)/2 \quad (\text{S2}')$$

Interactions are classified by the signs of  $\nabla^2 \rho_b(\mathbf{r}_c)$  and  $H_b(\mathbf{r}_c)$ . Interactions in the region of  $\nabla^2 \rho_b(\mathbf{r}_c) < 0$  are called shared-shell (SS) interactions and they are closed-shell (CS) interactions for  $\nabla^2 \rho_b(\mathbf{r}_c) > 0$ .  $H_b(\mathbf{r}_c)$  must be negative when  $\nabla^2 \rho_b(\mathbf{r}_c) < 0$ , since  $H_b(\mathbf{r}_c)$  are larger than  $(\hbar^2/8m)\nabla^2 \rho_b(\mathbf{r}_c)$  by  $V_b(\mathbf{r}_c)/2$  with negative  $V_b(\mathbf{r}_c)$  at all BCPs (Equation (S2)). Consequently,  $\nabla^2 \rho_b(\mathbf{r}_c) < 0$  and  $H_b(\mathbf{r}_c) < 0$  for the SS interactions. The CS interactions are especially called *pure* CS interactions for  $H_b(\mathbf{r}_c) > 0$  and  $\nabla^2 \rho_b(\mathbf{r}_c) > 0$ , since electrons at BCPs are depleted and destabilized under the conditions.<sup>SA1a</sup> Electrons in the intermediate region between SS and *pure* CS, which belong to CS, are locally depleted but stabilized at BCPs, since  $\nabla^2 \rho_b(\mathbf{r}_c) > 0$  but  $H_b(\mathbf{r}_c) < 0$  [38]. We call the interactions in this region *regular* CS [35,36], when it is necessary to distinguish from *pure* CS. The role of  $\nabla^2 \rho_b(\mathbf{r}_c)$  in the classification can be replaced by  $H_b(\mathbf{r}_c) - V_b(\mathbf{r}_c)/2$ , since  $(\hbar^2/8m)\nabla^2 \rho_b(\mathbf{r}_c) = H_b(\mathbf{r}_c) - V_b(\mathbf{r}_c)/2$  (Equation (S2)). Scheme S1 summarizes the classification.

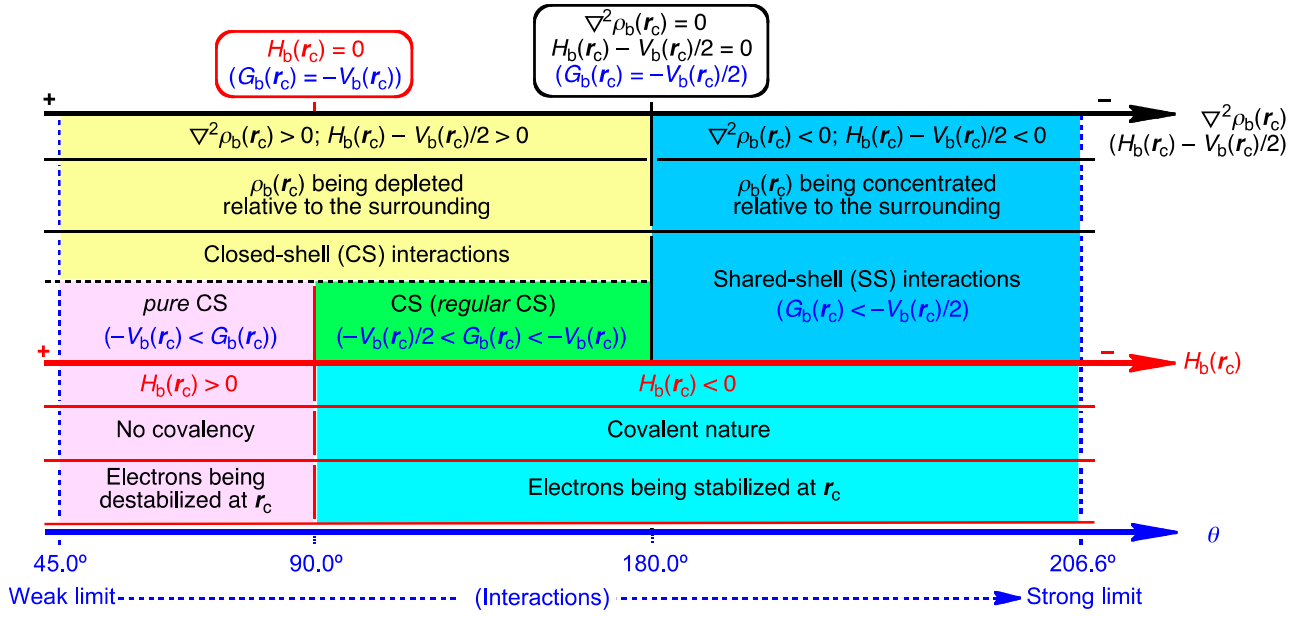

**Scheme S1.** Classification of interactions by the signs of  $\nabla^2 \rho_b(r_c)$  and  $H_b(r_c)$ , together with  $G_b(r_c)$  and  $V_b(r_c)$ .

We proposed QTAIM-DFA by plotting  $H_b(r_c)$  versus  $H_b(r_c) - V_b(r_c)/2$  ( $= (\hbar^2/8m)\nabla^2 \rho_b(r_c)$ ) [65], after the proposal of  $H_b(r_c)$  versus  $\nabla^2 \rho_b(r_c)$  [35,36]. Both axes in the plot of the former are given in energy unit, therefore, distances on the  $(x, y)$  ( $= (H_b(r_c) - V_b(r_c)/2, H_b(r_c))$ ) plane can be expressed in the energy unit, which provides an analytical development. QTAIM-DFA incorporates the classification of interactions by the signs of  $\nabla^2 \rho_b(r_c)$  and  $H_b(r_c)$ . Scheme S2 summarizes the QTAIM-DFA treatment. Interactions of *pure CS* appear in the first quadrant, those of *regular CS* in the fourth quadrant and SS interactions do in the third quadrant. No interactions appear in the second one.

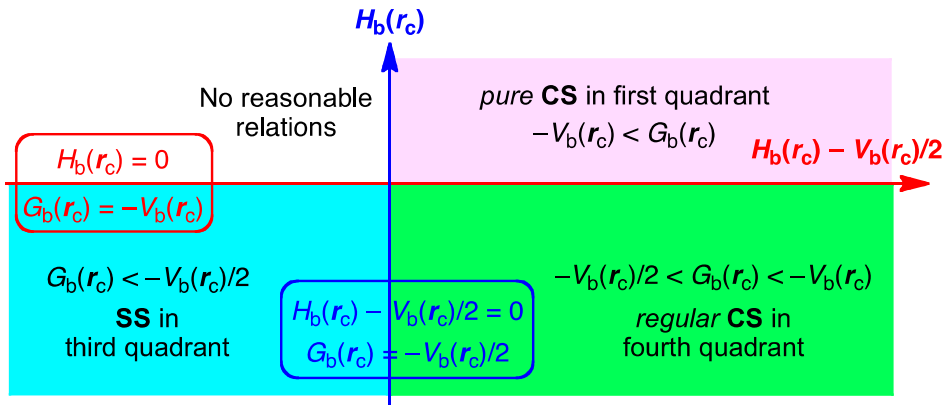

**Scheme S2.** QTAIM-DFA: Plot of  $H_b(r_c)$  versus  $H_b(r_c) - V_b(r_c)/2$  for Weak to Strong Interactions.

In our treatment, data for perturbed structures around fully optimized structures are also employed for the plots, together with the fully optimized ones (see Fig. S1) [35–37]. We proposed the concept of the "dynamic nature of interaction" originated from the perturbed structures. The behavior of interactions at the fully optimized structures corresponds to "the static nature of interactions", whereas that containing perturbed structures exhibit the "dynamic nature of interaction" as explained below.

The method to generate the perturbed structures is discussed later. Plots of  $H_b(\mathbf{r}_c)$  versus  $H_b(\mathbf{r}_c) - V_b(\mathbf{r}_c)/2$  are analyzed employing the polar coordinate  $(R, \theta)$  representation with  $(\theta_p, \kappa_p)$  parameters [35–37]. Fig. S1 explains the treatment.  $R$  in  $(R, \theta)$  is defined by Equation (S3) and given in the energy unit. Indeed,  $R$  does not correspond to the usual interaction energy, but it does to the local energy at BCP, expressed by  $[(H_b(\mathbf{r}_c))^2 + (H_b(\mathbf{r}_c) - V_b(\mathbf{r}_c)/2)^2]^{1/2}$  in the plot (cf: Equation (S3)), where  $R = 0$  for the enough large interaction distance. The plots show a spiral stream, as a whole.  $\theta$  in  $(R, \theta)$  defined by Equation (S4), measured from the  $y$ -axis, controls the spiral stream of the plot. Each plot for an interaction shows a specific curve, which provides important information of the interaction (see Fig. S1). The curve is expressed by  $\theta_p$  and  $\kappa_p$ . While  $\theta_p$ , defined by Equation (S5) and measured from the  $y$ -direction, corresponds to the tangent line of a plot, where  $\theta_p$  is calculated employing data of the perturbed structures with a fully-optimized structure and  $\kappa_p$  is the curvature of the plot (Equation (S6)). While  $(R, \theta)$  correspond to the static nature,  $(\theta_p, \kappa_p)$  represent the dynamic nature of interactions. We call  $(R, \theta)$  and  $(\theta_p, \kappa_p)$  QTAIM-DFA parameters, whereas  $\rho_b(\mathbf{r}_c)$ ,  $\nabla^2 \rho_b(\mathbf{r}_c)$ ,  $G_b(\mathbf{r}_c)$ ,  $V_b(\mathbf{r}_c)$ ,  $H_b(\mathbf{r}_c)$  and  $H_b(\mathbf{r}_c) - V_b(\mathbf{r}_c)/2$  belong to QTAIM functions.  $k_b(\mathbf{r}_c)$ , defined by Equation (S7), is an QTAIM function but it will be treated as if it were an QTAIM-DFA parameter, if suitable.

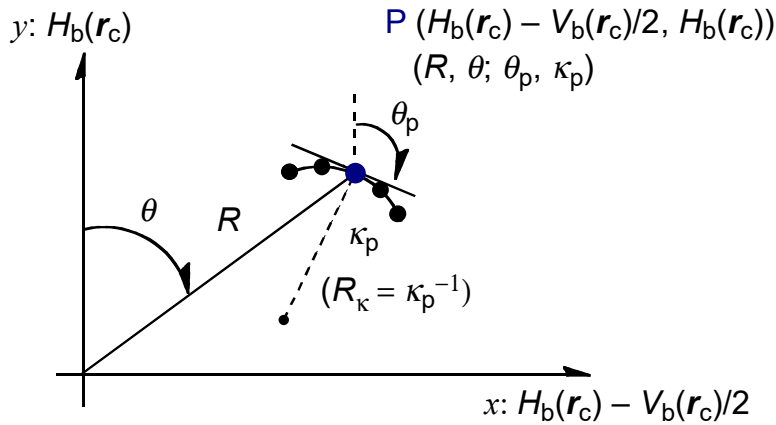

**Figure S1.** Polar  $(R, \theta)$  coordinate representation of  $H_b(\mathbf{r}_c)$  versus  $H_b(\mathbf{r}_c) - V_b(\mathbf{r}_c)/2$ , with  $(\theta_p, \kappa_p)$  parameters.

$$R = (x^2 + y^2)^{1/2} \quad (\text{S3})$$

$$\theta = 90^\circ - \tan^{-1}(y/x) \quad (\text{S4})$$

$$\theta_p = 90^\circ - \tan^{-1}(dy/dx) \quad (\text{S5})$$

$$\kappa_p = |d^2y/dx^2| / [1 + (dy/dx)^2]^{3/2} \quad (\text{S6})$$

$$k_b(\mathbf{r}_c) = V_b(\mathbf{r}_c)/G_b(\mathbf{r}_c) \quad (\text{S7})$$

$$\text{where } (x, y) = (H_b(\mathbf{r}_c) - V_b(\mathbf{r}_c)/2, H_b(\mathbf{r}_c))$$

## Criteria for Classification of Interactions: Behavior of Typical Interactions Elucidated by QTAIM-DFA

$H_b(r_c)$  are plotted versus  $H_b(r_c) - V_b(r_c)/2$  for typical interactions in vdW (van der Waals interactions), HBs (hydrogen bonds), CT-MCs (molecular complexes through charge transfer),  $X_3^-$  (trihalide ions), CT-TBPs (trigonal bipyramidal adducts through charge-transfer), Cov-w (weak covalent bonds) and Cov-s (strong covalent bonds) [35–37]. Rough criteria are obtained by applying QTAIM-DFA, after the analysis of the plots for the typical interactions according to Equations (S3)–(S7). Scheme S3 shows the rough criteria, which are accomplished by the  $\theta$  and  $\theta_p$  values, together with the values of  $k_b(r_c)$ . The criteria will be employed to discuss the nature of interactions in question, as a reference.

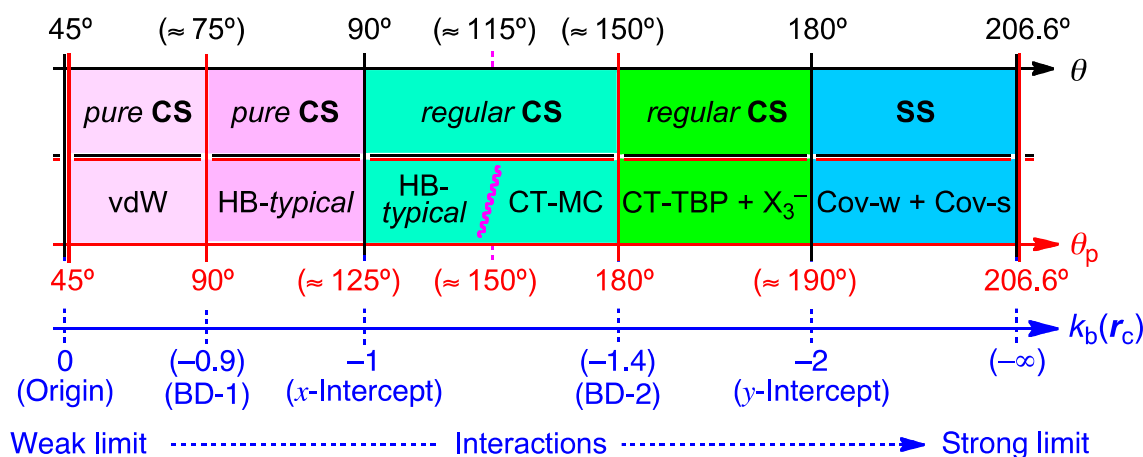

**Scheme S3.** Rough classification and characterization of interactions by  $\theta$  and  $\theta_p$ , together with  $k_b(r_c)$  ( $= V_b(r_c)/G_b(r_c)$ ).

## Characterization of interactions

The characterization of interactions is explained employing  $[^1\text{Cl}-^2\text{Cl}-^3\text{Cl}]^-$ . The wide range of the perturbed structures were generated by partially optimizing  $r(^2\text{Cl}-^3\text{Cl})$  in  $[^1\text{Cl}-^2\text{Cl}-^3\text{Cl}]^-$ , assuming the  $C_{\infty v}$  symmetry, with  $r(^1\text{Cl}-^2\text{Cl})$  being fixed in the wide range. The partial optimization method is called POM [35,36,65]. The QTAIM functions, such as  $V_b(r_c)$ ,  $G_b(r_c)$ ,  $H_b(r_c)$ ,  $H_b(r_c) - V_b(r_c)/2$  are calculated at BCPs for the wide varieties of the perturbed structures of  $[^1\text{Cl}-^2\text{Cl}-^3\text{Cl}]^-$ .  $H_b(r_c) - V_b(r_c)/2$  and  $H_b(r_c)$  are plotted versus the interaction distances  $r(^1\text{Cl}-^2\text{Cl})$  in the perturbed structures of  $[^1\text{Cl}-^2\text{Cl}-^3\text{Cl}]^-$ , in the wide range. Fig. S2 shows the plots. Each plot is analyzed using a regression curve of the ninth function and the first derivative of each regression curve is obtained. As shown in Fig. S2, the maximum value of  $H_b(r_c)$  ( $d(H_b(r_c))/dr = 0$ ) is defined as the borderline between vdW and t-HB interactions. Similarly, the maximum value of  $H_b(r_c) - V_b(r_c)/2$  ( $d(H_b(r_c) - V_b(r_c)/2)/dr = 0$ ) does to the borderline between CT-MC and CT-TBP. However, it seems difficult to find a characteristic

point corresponding to the borderline between  $t$ -HB and CT-MC in nature. Therefore, the borderline is tentatively given by  $\theta_p = 150^\circ$  based on the expectation from the experimental results, where  $\theta_p$  is defined by  $[90^\circ - \tan^{-1}[dH_b(r_c)/d(H_b(r_c) - V_b(r_c)/2)]]$  in the plot of  $H_b(r_c)$  versus  $H_b(r_c) - V_b(r_c)/2$ . The proposed classification and characterization of interactions, by means of the QTAIM functions of  $H_b(r_c)$ ,  $H_b(r_c) - V_b(r_c)/2$ ,  $G_b(r_c)$  and/or  $V_b(r_c)$ , are summarized in Table S1. The plot of  $H_b(r_c) - V_b(r_c)/2$  versus  $w$  in Fig. S2 is essentially the same as that of  $\nabla^2\rho_b(r_c)$  versus  $d(H\cdots F)$  in  $X-H\cdots F-Y$ , presented by Espinosa and co-workers [68,69].

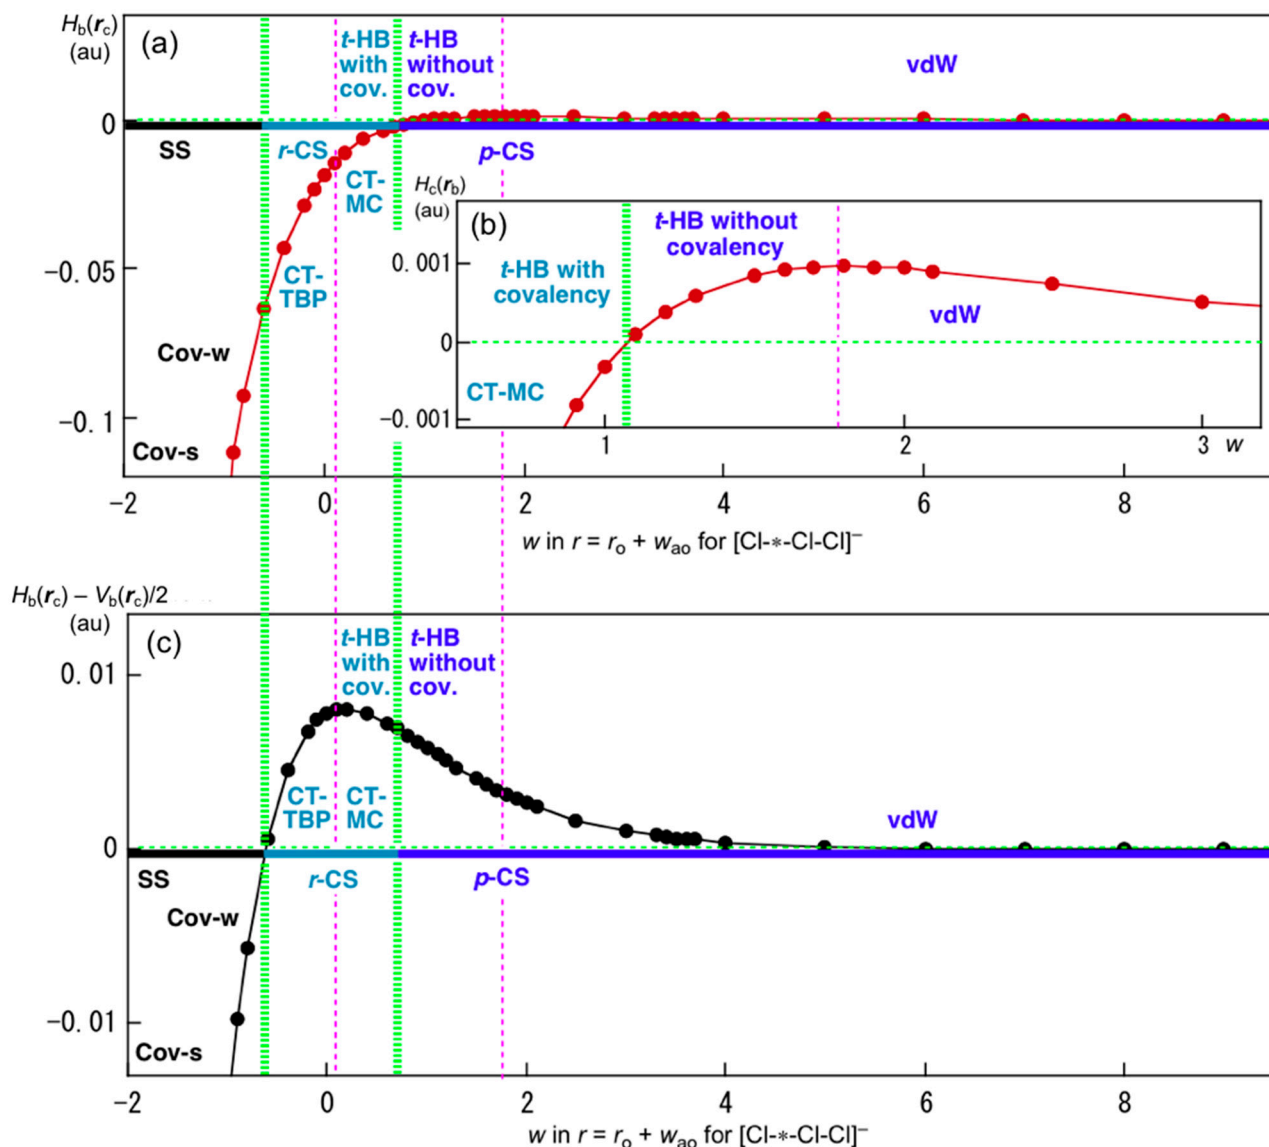

**Figure S2.** Plot of  $H_b(r_c)$  versus  $w$  in  $r(^1Cl-^2Cl) = r_o(^1Cl-^2Cl) + wa_o$  for  $^1Cl-^2Cl-^3Cl^-$  (a) with the magnified picture of (a) (b) and that of  $H_b(r_c) - V_b(r_c)/2$  versus  $w$  (c). Typical hydrogen bonds without covalency and typical hydrogen bonds with covalency are abbreviated as  $t$ -HB without cov. and  $t$ -HB with cov., respectively, whereas Cov-w and Cov-s stand for weak covalent bonds and strong covalent bonds, respectively.

**Table S1.** Proposed definitions for the classification and characterization of interactions by the signs  $H_b(r_c)$  and  $H_b(r_c) - V_b(r_c)/2$  and their first derivatives, together with the tentatively proposed definitions by the characteristic points on the plots of  $H_b(r_c)$  versus  $H_b(r_c) - V_b(r_c)/2$ . The tentatively proposed definitions are shown by italic. The requirements for the interactions are also shown.

| ChP/Interaction                      | Requirements by $H_b(r_c)$ and $V_b(r_c)$                                           | Requirements by $G_b(r_c)$ and $V_b(r_c)$                                       |
|--------------------------------------|-------------------------------------------------------------------------------------|---------------------------------------------------------------------------------|
| Origin                               | $H_b(r_c) - V_b(r_c)/2 = 0; H_b(r_c) = 0$                                           | $G_b(r_c) = 0; V_b(r_c) = 0$                                                    |
| vdW                                  | $H_b(r_c) > 0; dH_b(r_c)/d(-r) > 0$                                                 | $G_b(r_c) > -V_b(r_c); dG_b(r_c)/d(-r) > -dV_b(r_c)/d(-r)$                      |
| Borderline (BD-1)                    | $H_b(r_c) > 0; dH_b(r_c)/d(-r) = 0$                                                 | $G_b(r_c) > -V_b(r_c); dG_b(r_c)/d(-r) = -dV_b(r_c)/d(-r)$                      |
| $t$ -HB <sub>with no covalency</sub> | $H_b(r_c) > 0; dH_b(r_c)/d(-r) < 0$                                                 | $G_b(r_c) > -V_b(r_c); dG_b(r_c) < -dV_b(r_c)$                                  |
| Borderline (x-intercept)             | $H_b(r_c) = 0$ ( $\theta_p^a = 125^\circ$ )                                         | $G_b(r_c) = -V_b(r_c)$ ( $\theta_p^a = 125^\circ$ )                             |
| $t$ -HB <sub>with covalency</sub>    | $H_b(r_c) < 0; (125^\circ <) \theta_p^a < 150^\circ$                                | $G_b(r_c) < -V_b(r_c); (125^\circ <) \theta_p^b < 150^\circ$                    |
| <i>Borderline (Tentative)</i>        | $\theta_p^a = 150^\circ$                                                            | $\theta_p^b = 150^\circ$                                                        |
| CT-MC                                | $d(H_b(r_c) - V_b(r_c)/2)/d(-r) > 0;$<br>$150^\circ < \theta_p^a < 180^\circ$       | $dG_b(r_c) > dV_b(r_c)/2;$<br>$150^\circ < \theta_p^a < 180^\circ$              |
| Borderline (BD-2)                    | $d(H_b(r_c) - V_b(r_c)/2)/d(-r) = 0$<br>$(H_b(r_c) - V_b(r_c)/2 > 0; H_b(r_c) < 0)$ | $2dG_b(r_c)/d(-r) = -dV_b(r_c)/d(-r)$<br>$(-V_b(r_c)/2 < G_b(r_c) < -V_b(r_c))$ |
| CT-TBP with $X_3^-$                  | $d(H_b(r_c) - V_b(r_c)/2)/d(-r) < 0$<br>$(H_b(r_c) - V_b(r_c)/2 > 0; H_b(r_c) < 0)$ | $2dG_b(r_c)/d(-r) < -dV_b(r_c)/d(-r)$<br>$(-V_b(r_c)/2 < G_b(r_c) < -V_b(r_c))$ |
| Borderline (y-intercept)             | $H_b(r_c) - V_b(r_c)/2 = 0$ ( $H_b(r_c) < 0$ )                                      | $G_b(r_c) = -V_b(r_c)/2$ ( $G_b(r_c) < -V_b(r_c)$ )                             |
| Cov-w                                | $H_b(r_c) - V_b(r_c)/2 < 0; R^c < 0.15 \text{ au}$                                  | $G_b(r_c) < -V_b(r_c)/2; R^c < 0.15 \text{ au}$                                 |
| <i>Borderline (Tentative)</i>        | $R^c = 0.15 \text{ au}$                                                             | $R^d = 0.15 \text{ au}$                                                         |
| Cov-s                                | $H_b(r_c) - V_b(r_c)/2 < 0; R^c > 0.15 \text{ au}$                                  | $G_b(r_c) < -V_b(r_c)/2; R^d > 0.15 \text{ au}$                                 |

<sup>a</sup>  $\theta_p = 90^\circ - \tan^{-1} [dH_b(r_c)/d(H_b(r_c) - V_b(r_c)/2)]$ ,  $\theta_p = 125^\circ$  is tentatively given for  $\theta = 90^\circ$ , where  $\theta$  is defined by  $90^\circ - \tan^{-1} [H_b(r_c)/(H_b(r_c) - V_b(r_c)/2)]$  with  $H_b(r_c) = 0$ . <sup>b</sup>  $\theta_p = 90^\circ - \tan^{-1} [d(G_b(r_c) + V_b(r_c))/d(G_b(r_c) + V_b(r_c)/2)]$ ,  $\theta_p = 125^\circ$  is tentatively given for  $\theta = 90^\circ$ , where  $\theta$  is defined by  $90^\circ - \tan^{-1} [(G_b(r_c) + V_b(r_c))/(G_b(r_c) + V_b(r_c)/2)]$  with  $(G_b(r_c) + V_b(r_c)) = 0$ . <sup>c</sup>  $R = [(H_b(r_c) - V_b(r_c)/2)^2 + (H_b(r_c))^2]^{1/2}$ . <sup>d</sup>  $R = [(G_b(r_c) + V_b(r_c)/2)^2 + (G_b(r_c) + V_b(r_c))^2]^{1/2}$ .



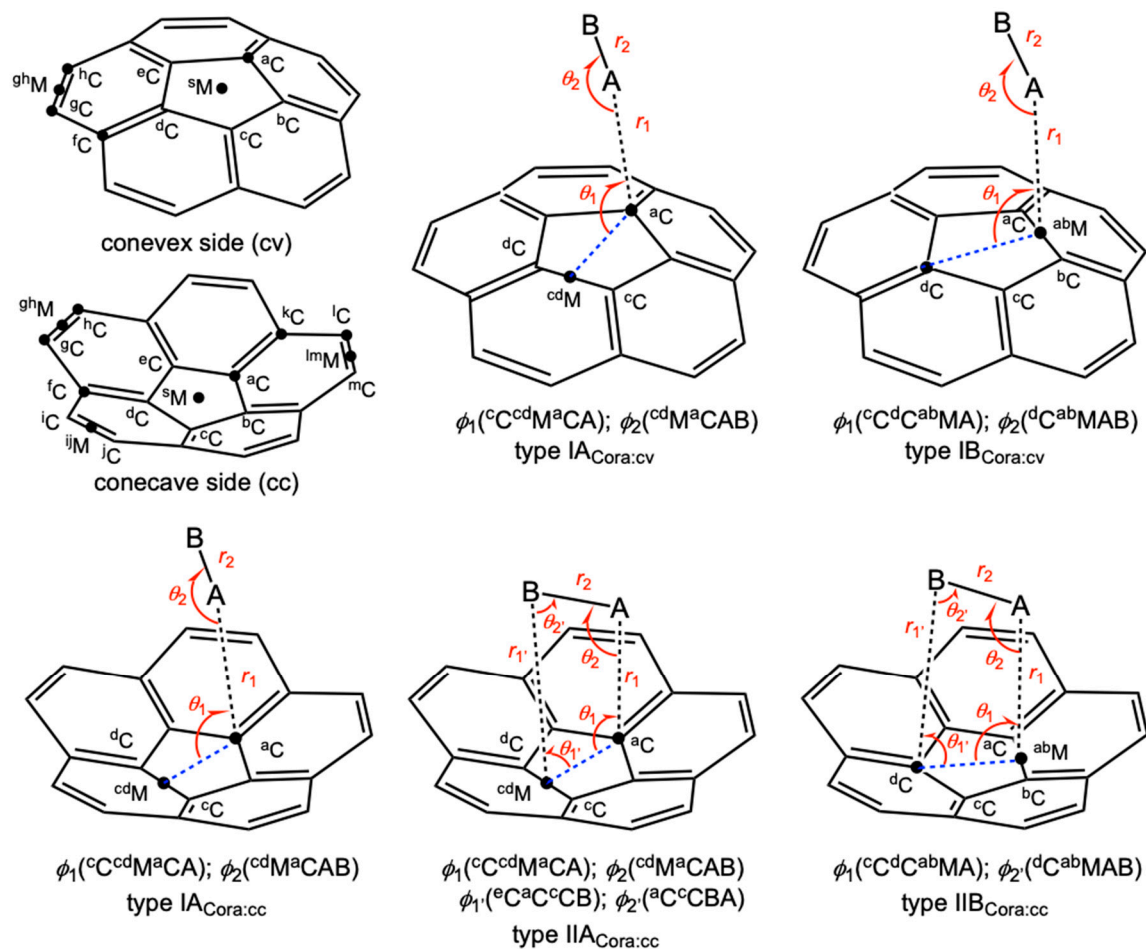

(A, B) = (H, X), (X, X) and (X, F) (X = F, Cl, Br and I)

**Scheme S4.** Convex (cv) and concave (cc) sides of corannulene and definition of structural types of B-A--- $\pi(\text{C}_{20}\text{H}_{10})$ , to be clarified, where (A, B) = (H, X), (X, X), or (X, F) (X = F, Cl, Br and I) with structural parameters.

**Table S2.** The structural parameters for X–H–\*– $\pi$ (C<sub>20</sub>H<sub>10</sub>) and Y–X–\*– $\pi$ (C<sub>20</sub>H<sub>10</sub>) (X, Y = F, Cl, Br and I), evaluated with MP2/BSS-A<sup>a,b</sup>

| species                                                                                             | $r_1$<br>(Å) | $r_2$<br>(Å) | $\theta_1$<br>(°) | $\theta_2$<br>(°) | $\phi_1$<br>(°) | $\phi_2$<br>(°) |
|-----------------------------------------------------------------------------------------------------|--------------|--------------|-------------------|-------------------|-----------------|-----------------|
| Convex side                                                                                         |              |              |                   |                   |                 |                 |
| F–H–*– $\pi$ ( <sup>a</sup> C) (C <sub>1</sub> : IA <sub>Cora:cv</sub> )                            | 2.1577       | 0.9278       | 106.1             | 174.7             | -107.92         | 153.65          |
| Cl–H–*– $\pi$ ( <sup>ab</sup> M) (C <sub>s</sub> : IB <sub>Cora:cv</sub> )                          | 2.2123       | 1.2864       | 120.8             | 172.6             | -90.08          | 177.87          |
| Br–H–*– $\pi$ ( <sup>ab</sup> M) (C <sub>1</sub> : IB <sub>Cora:cv</sub> )                          | 2.2059       | 1.4259       | 120.3             | 171.1             | -89.86          | -179.80         |
| I–H–*– $\pi$ ( <sup>ab</sup> M) (C <sub>s</sub> : IB <sub>Cora:cv</sub> )                           | 2.2118       | 1.6300       | 120.8             | 172.6             | -89.87          | 180.00          |
| F–F–*– $\pi$ ( <sup>a</sup> C) (C <sub>s</sub> : IA <sub>Cora:cv</sub> )                            | 2.5216       | 1.4178       | 108.4             | 177.3             | -90.00          | 0.00            |
| Cl–Cl–*– $\pi$ ( <sup>a</sup> C) (C <sub>s</sub> : IA <sub>Cora:cv</sub> )                          | 2.6865       | 2.0125       | 105.6             | 178.4             | -90.00          | 0.00            |
| Br–Br–*– $\pi$ ( <sup>a</sup> C) (C <sub>s</sub> : IA <sub>Cora:cv</sub> )                          | 2.7162       | 2.3079       | 105.8             | 178.3             | -90.00          | 0.00            |
| I–I–*– $\pi$ ( <sup>a</sup> C) (C <sub>s</sub> : IA <sub>Cora:cv</sub> )                            | 2.8729       | 2.6935       | 102.5             | 179.2             | -90.00          | 0.00            |
| F–Cl–*– $\pi$ ( <sup>a</sup> C) (C <sub>s</sub> : IA <sub>Cora:cv</sub> )                           | 2.5441       | 1.6757       | 108.9             | 177.2             | -90.00          | 0.00            |
| F–Br–*– $\pi$ ( <sup>a</sup> C) (C <sub>s</sub> : IA <sub>Cora:cv</sub> )                           | 2.5710       | 1.8145       | 108.8             | 177.3             | -90.00          | 0.00            |
| F–I–*– $\pi$ ( <sup>a</sup> C) (C <sub>1</sub> : IA <sub>Cora:cv</sub> )                            | 2.7019       | 1.9583       | 106.5             | 106.5             | -90.00          | 0.00            |
| Concave side                                                                                        |              |              |                   |                   |                 |                 |
| F–H–*– $\pi$ ( <sup>a</sup> C) (C <sub>1</sub> : IA <sub>Cora:cc</sub> )                            | 2.2571       | 0.9263       | 75.0              | 167.8             | -90.28          | -1.08           |
| Cl–H–*– $\pi$ ( <sup>a</sup> C) (C <sub>s</sub> : IIA <sub>Cora:cc</sub> )                          | 2.3179       | 1.2859       | 82.4              | 141.3             | -90.00          | 0.00            |
| <i>H–Cl–*–<math>\pi</math>(<sup>c</sup>C) (C<sub>s</sub>: IIA<sub>Cora:cc</sub>)<sup>c,d</sup></i>  | 3.3969       | 1.2859       | 70.9              | 63.3              | -83.25          | -8.97           |
| Br–H–*– $\pi$ ( <sup>a</sup> C) (C <sub>1</sub> : IIA <sub>Cora:cc</sub> )                          | 2.3134       | 1.4253       | 83.7              | 140.5             | -90.00          | 0.00            |
| <i>H–Br–*–<math>\pi</math>(<sup>c</sup>C) (C<sub>1</sub>: IIA<sub>Cora:cc</sub>)<sup>c,d</sup></i>  | 3.4851       | 1.4253       | 72.1              | 61.8              | -83.22          | -8.96           |
| I–H–*– $\pi$ ( <sup>f</sup> C) (C <sub>1</sub> : IIA <sub>Cora:cc</sub> )                           | 2.4148       | 1.6163       | 88.1              | 131.7             | -90.00          | 0.01            |
| <i>I–H–*–<math>\pi</math>(<sup>c</sup>C) (C<sub>1</sub>: IIA<sub>Cora:cc</sub>)<sup>c,d</sup></i>   | 3.6219       | 1.6163       | 73.5              | 64.6              | -83.17          | -10.21          |
| F–F–*– $\pi$ ( <sup>a</sup> C) (C <sub>s</sub> : IIA <sub>Cora:cc</sub> )                           | 2.9638       | 1.4045       | 78.7              | 104.6             | -90.00          | 0.00            |
| <i>F–F–*–<math>\pi</math>(<sup>c</sup>C) (C<sub>s</sub>: IIA<sub>Cora:cc</sub>)<sup>c,d</sup></i>   | 3.0747       | 1.4045       | 82.5              | 90.4              | -78.29          | -16.90          |
| Cl–Cl–*– $\pi$ ( <sup>f</sup> C) (C <sub>1</sub> : IIA <sub>Cora:cc</sub> )                         | 3.2393       | 1.9909       | 72.7              | 99.4              | -90.00          | 0.00            |
| <i>Cl–Cl–*–<math>\pi</math>(<sup>j</sup>M) (C<sub>1</sub>: IIA<sub>Cora:cc</sub>)</i>               | 3.2877       | 1.9909       | 60.2              | 125.7             | -87.85          | -12.25          |
| Br–Br–*– $\pi$ ( <sup>a</sup> C) (C <sub>s</sub> : IIB <sub>Cora:cc</sub> )                         | 3.1310       | 2.2747       | 76.8              | 136.4             | -90.18          | 0.00            |
| <i>Br–Br–*–<math>\pi</math>(<sup>i</sup>C) (C<sub>s</sub>: IIB<sub>Cora:cc</sub>)<sup>c,d</sup></i> | 3.8110       | 2.2747       | 77.0              | 79.1              | -106.96         | 10.37           |
| I–I–*– $\pi$ ( <sup>a</sup> C) (C <sub>s</sub> : IIB <sub>Cora:cc</sub> )                           | 3.2751       | 2.6589       | 77.0              | 133.9             | -90.26          | 0.00            |
| <i>I–I–*–<math>\pi</math>(<sup>d</sup>C) (C<sub>s</sub>: IIB<sub>Cora:cc</sub>)<sup>c,d</sup></i>   | 4.6346       | 2.6589       | 100.5             | 48.6              | -83.78          | 0.00            |
| <i>I–I–*–<math>\pi</math>(<sup>g</sup>C) (C<sub>s</sub>: IIB<sub>Cora:cc</sub>)<sup>c,d</sup></i>   | 3.9223       | 2.6589       | 83.8              | 74.4              | -108.28         | 11.02           |
| F–Cl–*– $\pi$ ( <sup>a</sup> C) (C <sub>1</sub> : IA <sub>Cora:cc</sub> )                           | 2.9621       | 1.6482       | 73.4              | 177.0             | -90.00          | 0.04            |
| F–Br–*– $\pi$ ( <sup>a</sup> C) (C <sub>1</sub> : IA <sub>Cora:cc</sub> )                           | 3.0397       | 1.7818       | 73.9              | 177.4             | -90.00          | 0.08            |
| F–I–*– $\pi$ ( <sup>a</sup> C) (C <sub>s</sub> : IA <sub>Cora:cc</sub> )                            | 3.1824       | 1.9358       | 73.8              | 178.9             | -90.00          | -180.00         |

<sup>a</sup> See text for BSS-A. <sup>b</sup> See Scheme S1 for the definition of the structural parameters. <sup>c</sup> Data shown in italic correspond to the additional interaction. <sup>d</sup> The descriptions of  $r_1$ ,  $r_2$ ,  $\theta_1$ ,  $\theta_2$ ,  $\phi_1$  and  $\phi_2$  should be read as  $r_1'$ ,  $r_2'$ ,  $\theta_1'$ ,  $\theta_2'$ ,  $\phi_1'$  and  $\phi_2'$ , respectively.

**Table S3.**  $\Delta E_{\text{ES}}$  and  $\Delta E_{\text{ZP}}$  in  $\text{X-H}^*-\pi(\text{C}_{20}\text{H}_{10})$  and  $\text{Y-X}^*-\pi(\text{C}_{20}\text{H}_{10})$  ( $\text{X}, \text{Y} = \text{F}, \text{Cl}, \text{Br}$  and  $\text{I}$ ), evaluated with MP2/BSS-A, together with second-perturbation energies  $E(2)$  for the donor-acceptor ( $\text{NBO}(i) \rightarrow \text{NBO}(j)$ ) interactions of  $\pi(\text{C}=\text{C}) \rightarrow \sigma^*(\text{X-H})$  and  $\pi(\text{C}=\text{C}) \rightarrow \sigma^*(\text{Y-X})$ , calculated with the NBO analysis under M06-2X/BSS-A//MP2/BSS-A<sup>a</sup>

| species                                                                                  | $\Delta E_{\text{ES}}^{b,c}$<br>(kJ mol <sup>-1</sup> ) | $\Delta E_{\text{ZP}}^{b,d}$<br>(kJ mol <sup>-1</sup> ) | $E(2)^e$<br>(kcal mol <sup>-1</sup> ) | $\varepsilon_j - \varepsilon_i^f$<br>(au) | $F(i,j)^g$<br>(au) |
|------------------------------------------------------------------------------------------|---------------------------------------------------------|---------------------------------------------------------|---------------------------------------|-------------------------------------------|--------------------|
| Convex side                                                                              |                                                         |                                                         |                                       |                                           |                    |
| F-H- $\pi^{\text{aC}}$ ( $\text{C}_1$ : $\text{IA}_{\text{Cora:cv}}$ )                   | -23.4                                                   | -19.1                                                   | 2.54                                  | 0.82                                      | 0.041              |
| Cl-H- $\pi^{\text{abM}}$ ( $\text{C}_5$ : $\text{IB}_{\text{Cora:cv}}$ )                 | -25.9                                                   | -23.3                                                   | 1.25 <sup>h</sup>                     | 0.56                                      | 0.024              |
| Br-H- $\pi^{\text{abM}}$ ( $\text{C}_1$ : $\text{IB}_{\text{Cora:cv}}$ )                 | -27.8                                                   | -25.6                                                   | 1.58 <sup>h</sup>                     | 0.48                                      | 0.025              |
| I-H- $\pi^{\text{abM}}$ ( $\text{C}_5$ : $\text{IB}_{\text{Cora:cv}}$ )                  | -28.0                                                   | -25.5                                                   | 1.84 <sup>h</sup>                     | 0.43                                      | 0.025              |
| F-F- $\pi^{\text{aC}}$ ( $\text{C}_5$ : $\text{IA}_{\text{Cora:cv}}$ )                   | -17.0                                                   | -15.8                                                   | 4.47                                  | 0.27                                      | 0.031              |
| Cl-Cl- $\pi^{\text{aC}}$ ( $\text{C}_5$ : $\text{IA}_{\text{Cora:cv}}$ )                 | -36.6                                                   | -35.2                                                   | 6.78                                  | 0.32                                      | 0.042              |
| Br-Br- $\pi^{\text{aC}}$ ( $\text{C}_5$ : $\text{IA}_{\text{Cora:cv}}$ )                 | -43.0                                                   | -41.7                                                   | 10.45                                 | 0.28                                      | 0.048              |
| I-I- $\pi^{\text{aC}}$ ( $\text{C}_5$ : $\text{IA}_{\text{Cora:cv}}$ )                   | -48.6                                                   | -47.5                                                   | 9.00                                  | 0.27                                      | 0.044              |
| F-Cl- $\pi^{\text{aC}}$ ( $\text{C}_5$ : $\text{IA}_{\text{Cora:cv}}$ )                  | -41.4                                                   | -39.2                                                   | 13.23                                 | 0.34                                      | 0.060              |
| F-Br- $\pi^{\text{aC}}$ ( $\text{C}_5$ : $\text{IA}_{\text{Cora:cv}}$ )                  | -53.2                                                   | -50.9                                                   | 19.21                                 | 0.33                                      | 0.071              |
| F-I- $\pi^{\text{aC}}$ ( $\text{C}_1$ : $\text{IA}_{\text{Cora:cv}}$ )                   | -64.3                                                   | -61.9                                                   | 45.02 <sup>i</sup>                    | 0.18                                      | 0.081              |
| Concave side                                                                             |                                                         |                                                         |                                       |                                           |                    |
| F-H- $\pi^{\text{aC}}$ ( $\text{C}_1$ : $\text{IA}_{\text{Cora:cc}}$ )                   | -27.8                                                   | -24.8                                                   | 1.16                                  | 0.81                                      | 0.027              |
| Cl-H- $\pi^{\text{aC}}$ ( $\text{C}_5$ : $\text{IIA}_{\text{Cora:cc}}$ )                 | -44.7                                                   | -42.0                                                   | 2.77                                  | 0.55                                      | 0.035              |
| Br-H- $\pi^{\text{aC}}$ ( $\text{C}_1$ : $\text{IIA}_{\text{Cora:cc}}$ )                 | -49.2                                                   | -46.7                                                   | 3.73                                  | 0.49                                      | 0.038              |
| I-H- $\pi^{\text{aC}}$ ( $\text{C}_1$ : $\text{IIA}_{\text{Cora:cc}}$ )                  | -12.3                                                   | -10.0                                                   | 3.52                                  | 0.43                                      | 0.035              |
| F-F- $\pi^{\text{aC}}$ ( $\text{C}_5$ : $\text{IIA}_{\text{Cora:cc}}$ )                  | -28.5                                                   | -26.7                                                   | <i>j</i>                              | <i>j</i>                                  | <i>j</i>           |
| Cl-Cl- $\pi^{\text{aC}}$ ( $\text{C}_1$ : $\text{IIA}_{\text{Cora:cc}}$ )                | -58.6                                                   | -56.9                                                   | 0.71                                  | 0.37                                      | 0.015              |
| Br-Br- $\pi^{\text{aC}}$ ( $\text{C}_5$ : $\text{IIB}_{\text{Cora:cc}}$ )                | -62.8                                                   | -61.4                                                   | 0.93 <sup>h</sup>                     | 0.28                                      | 0.014              |
| I-I- $\pi^{\text{aC}}$ ( $\text{C}_5$ : $\text{IIB}_{\text{Cora:cc}}$ )                  | -70.9                                                   | -69.9                                                   | 0.98 <sup>h,k</sup>                   | 0.26                                      | 0.014              |
| F-Cl- $\pi^{\text{aC}}$ ( $\text{C}_1$ : $\text{IA}_{\text{Cora:cc}}$ )                  | -48.5                                                   | -46.8                                                   | 2.56                                  | 0.35                                      | 0.027              |
| F-Br- $\pi^{\text{aC}}$ ( $\text{C}_1$ : $\text{IA}_{\text{Cora:cc}}$ )                  | -55.1                                                   | -53.6                                                   | 3.18                                  | 0.32                                      | 0.028              |
| F-I- $\pi^{\text{aC}}$ ( $\text{C}_5$ : $\text{IA}_{\text{Cora:cc}}$ )                   | -63.2                                                   | -62.1                                                   | 2.69                                  | 0.33                                      | 0.026              |
| Convex side                                                                              |                                                         |                                                         |                                       |                                           |                    |
| F-H- $\pi^{\text{SM}}$ ( $\text{C}_{5v}$ : $\text{ID}_{\text{Cora:cv}}$ ) <sup>l</sup>   | -20.3                                                   | -19.1                                                   | 0.20 <sup>h</sup>                     | 1.25                                      | 0.014              |
| Cl-H- $\pi^{\text{SM}}$ ( $\text{C}_{5v}$ : $\text{ID}_{\text{Cora:cv}}$ ) <sup>l</sup>  | -24.4                                                   | -23.7                                                   | 0.09 <sup>h</sup>                     | 0.55                                      | 0.006              |
| Br-H- $\pi^{\text{SM}}$ ( $\text{C}_{5v}$ : $\text{ID}_{\text{Cora:cv}}$ ) <sup>l</sup>  | -25.8                                                   | -25.2                                                   | 0.12 <sup>h</sup>                     | 0.48                                      | 0.007              |
| I-H- $\pi^{\text{SM}}$ ( $\text{C}_{5v}$ : $\text{ID}_{\text{Cora:cv}}$ ) <sup>l</sup>   | -27.0                                                   | -26.4                                                   | 1.49 <sup>h,i</sup>                   | 0.25                                      | 0.017              |
| F-F- $\pi^{\text{SM}}$ ( $\text{C}_{5v}$ : $\text{ID}_{\text{Cora:cv}}$ ) <sup>l</sup>   | -14.6                                                   | -13.8                                                   | 0.06 <sup>h</sup>                     | 0.27                                      | 0.004              |
| Cl-Cl- $\pi^{\text{SM}}$ ( $\text{C}_{5v}$ : $\text{ID}_{\text{Cora:cv}}$ ) <sup>l</sup> | -30.5                                                   | -29.7                                                   | 1.42 <sup>h,i</sup>                   | 0.14                                      | 0.012              |
| Br-Br- $\pi^{\text{SM}}$ ( $\text{C}_{5v}$ : $\text{ID}_{\text{Cora:cv}}$ ) <sup>l</sup> | -33.8                                                   | -33.1                                                   | 2.49 <sup>h,i</sup>                   | 0.09                                      | 0.013              |
| I-I- $\pi^{\text{SM}}$ ( $\text{C}_{5v}$ : $\text{ID}_{\text{Cora:cv}}$ ) <sup>l</sup>   | -40.6                                                   | -40.0                                                   | 3.31 <sup>h,i</sup>                   | 0.07                                      | 0.014              |
| F-Cl- $\pi^{\text{SM}}$ ( $\text{C}_{5v}$ : $\text{ID}_{\text{Cora:cv}}$ ) <sup>l</sup>  | -27.9                                                   | -26.8                                                   | 1.35 <sup>h,i</sup>                   | 0.16                                      | 0.013              |
| F-Br- $\pi^{\text{SM}}$ ( $\text{C}_{5v}$ : $\text{ID}_{\text{Cora:cv}}$ ) <sup>l</sup>  | -33.4                                                   | -32.3                                                   | 2.15 <sup>h,i</sup>                   | 0.13                                      | 0.015              |
| F-I- $\pi^{\text{SM}}$ ( $\text{C}_{5v}$ : $\text{ID}_{\text{Cora:cv}}$ ) <sup>l</sup>   | -62.8                                                   | -62.1                                                   | 0.76 <sup>h</sup>                     | 0.32                                      | 0.014              |
| Concave side                                                                             |                                                         |                                                         |                                       |                                           |                    |
| F-H- $\pi^{\text{SM}}$ ( $\text{C}_{5v}$ : $\text{ID}_{\text{Cora:cc}}$ ) <sup>l</sup>   | -26.8                                                   | -26.1                                                   | 0.23 <sup>h</sup>                     | 1.24                                      | 0.015              |
| Cl-H- $\pi^{\text{SM}}$ ( $\text{C}_{5v}$ : $\text{ID}_{\text{Cora:cc}}$ ) <sup>l</sup>  | -42.1                                                   | -41.2                                                   | 0.31 <sup>h</sup>                     | 0.55                                      | 0.012              |
| Br-H- $\pi^{\text{SM}}$ ( $\text{C}_{5v}$ : $\text{ID}_{\text{Cora:cc}}$ ) <sup>l</sup>  | -46.0                                                   | -45.4                                                   | 0.47 <sup>h</sup>                     | 0.48                                      | 0.013              |
| I-H- $\pi^{\text{SM}}$ ( $\text{C}_{5v}$ : $\text{ID}_{\text{Cora:cc}}$ ) <sup>l</sup>   | -8.4                                                    | -7.6                                                    | 0.60 <sup>h</sup>                     | 0.43                                      | 0.014              |
| F-F- $\pi^{\text{SM}}$ ( $\text{C}_{5v}$ : $\text{ID}_{\text{Cora:cc}}$ ) <sup>l</sup>   | -25.3                                                   | -24.5                                                   | 0.92 <sup>h,i</sup>                   | 0.09                                      | 0.008              |
| Cl-Cl- $\pi^{\text{SM}}$ ( $\text{C}_{5v}$ : $\text{ID}_{\text{Cora:cc}}$ ) <sup>l</sup> | -54.9                                                   | -53.8                                                   | 0.45 <sup>h</sup>                     | 0.32                                      | 0.011              |
| Br-Br- $\pi^{\text{SM}}$ ( $\text{C}_{5v}$ : $\text{ID}_{\text{Cora:cc}}$ ) <sup>l</sup> | -59.1                                                   | -58.2                                                   | 0.63 <sup>h</sup>                     | 0.28                                      | 0.012              |
| I-I- $\pi^{\text{SM}}$ ( $\text{C}_{5v}$ : $\text{ID}_{\text{Cora:cc}}$ ) <sup>l</sup>   | -66.3                                                   | -65.7                                                   | 0.78 <sup>h</sup>                     | 0.26                                      | 0.013              |
| F-Cl- $\pi^{\text{SM}}$ ( $\text{C}_{5v}$ : $\text{ID}_{\text{Cora:cc}}$ ) <sup>l</sup>  | -47.8                                                   | -46.6                                                   | 1.35 <sup>h,i</sup>                   | 0.16                                      | 0.013              |
| F-Br- $\pi^{\text{SM}}$ ( $\text{C}_{5v}$ : $\text{ID}_{\text{Cora:cc}}$ ) <sup>l</sup>  | -54.4                                                   | -53.3                                                   | 0.68 <sup>h</sup>                     | 0.31                                      | 0.013              |
| F-I- $\pi^{\text{SM}}$ ( $\text{C}_{5v}$ : $\text{ID}_{\text{Cora:cc}}$ ) <sup>l</sup>   | -43.1                                                   | -41.8                                                   | 2.56 <sup>h,i</sup>                   | 0.14                                      | 0.017              |

<sup>a</sup> See text for BSS-A. <sup>b</sup>  $\Delta E = E(\text{X-H}^*-\pi(\text{C}_{24}\text{H}_{12})/\text{Y-X}^*-\pi(\text{C}_{24}\text{H}_{12})) - (E(\text{X-H}/\text{Y-X}) + E(\text{C}_{24}\text{H}_{12}))$ . <sup>c</sup>  $\Delta E_{\text{ES}}$  stands for  $\Delta E$  on the energy surface. <sup>d</sup>  $\Delta E_{\text{Ent}}$  ( $\Delta E_{\text{ZP}}$ ) stands for  $\Delta E$  with the correction of the heat of enthalpy. <sup>e</sup> Second-perturbation energy. <sup>f</sup> The diagonal elements (orbital energies). <sup>g</sup> The off-diagonal NBO Fock matrix element. <sup>h</sup> Only one side of the CT interaction is shown due to symmetry. <sup>i</sup> NBO (*i*) is  $n_p(\text{C})$  which constitutes  $\pi(\text{C}=\text{C})$ . <sup>j</sup> Not detected. <sup>k</sup> Non negligible  $E(2)$  value for 0.66 kcal mol<sup>-1</sup> relative to 0.98 kcal mol<sup>-1</sup> is also detected. <sup>l</sup> Two imaginary frequencies being predicted for each.

**Table S4.** The  $r_{BP}$  and  $R_{SL}$  values evaluated with MP2/BSS-A for the optimized and observed structures of B–A–\*– $\pi(C_{20}H_{10})$ , together with the  $\Delta r_{BP}$  values<sup>a</sup>

| Compound                                                                                      | $r_{BP}^b$ (Å) | $R_{SL}^c$ (Å) | $\Delta r_{BP}^d$ (Å) |
|-----------------------------------------------------------------------------------------------|----------------|----------------|-----------------------|
| Convex side                                                                                   |                |                |                       |
| F–H–*– $\pi^{(a)C}$ ( $C_1$ : IA <sub>Cora:cv</sub> )                                         | 2.1958         | 2.1577         | 0.038                 |
| Cl–H–*– $\pi^{(ab)M}$ ( $C_s$ : IB <sub>Cora:cv</sub> )                                       | 2.2157         | 2.2118         | 0.004                 |
| Br–H–*– $\pi^{(ab)M}$ ( $C_1$ : IB <sub>Cora:cv</sub> )                                       | 2.8865         | 2.2059         | 0.681                 |
| I–H–*– $\pi^{(ab)M}$ ( $C_s$ : IB <sub>Cora:cv</sub> )                                        | 2.2101         | 2.1984         | 0.012                 |
| F–F–*– $\pi^{(a)C}$ ( $C_s$ : IA <sub>Cora:cv</sub> )                                         | 2.5238         | 2.5216         | 0.002                 |
| Cl–Cl–*– $\pi^{(a)C}$ ( $C_s$ : IA <sub>Cora:cv</sub> )                                       | 2.6869         | 2.6865         | 0.000                 |
| Br–Br–*– $\pi^{(a)C}$ ( $C_s$ : IA <sub>Cora:cv</sub> )                                       | 2.7165         | 2.7162         | 0.000                 |
| I–I–*– $\pi^{(a)C}$ ( $C_s$ : IA <sub>Cora:cv</sub> )                                         | 2.8730         | 2.8729         | 0.000                 |
| F–Cl–*– $\pi^{(a)C}$ ( $C_s$ : IA <sub>Cora:cv</sub> )                                        | 2.5458         | 2.5441         | 0.002                 |
| F–Br–*– $\pi^{(a)C}$ ( $C_s$ : IA <sub>Cora:cv</sub> )                                        | 2.5720         | 2.5710         | 0.001                 |
| F–I–*– $\pi^{(a)C}$ ( $C_1$ : IA <sub>Cora:cv</sub> )                                         | 2.7022         | 2.7019         | 0.000                 |
| Concave side                                                                                  |                |                |                       |
| F–H–*– $\pi^{(a)C}$ ( $C_1$ : IA <sub>Cora:cc</sub> )                                         | 2.2862         | 2.2571         | 0.029                 |
| Cl–H–*– $\pi^{(a)C}$ ( $C_s$ : IIA <sub>Cora:cc</sub> )                                       | 2.4148         | 2.3179         | 0.097                 |
| <i>H–Cl–*–<math>\pi^{(d)C}</math> (<math>C_s</math>: IIA<sub>Cora:cc</sub>)<sup>d</sup></i>   | <i>2.4148</i>  | <i>2.3179</i>  | <i>0.097</i>          |
| Br–H–*– $\pi^{(a)C}$ ( $C_1$ : IIA <sub>Cora:cc</sub> )                                       | 2.4934         | 2.3134         | 0.180                 |
| <i>H–Br–*–<math>\pi^{(d)C}</math> (<math>C_1</math>: IIA<sub>Cora:cc</sub>)<sup>d</sup></i>   | <i>3.4962</i>  | <i>3.4851</i>  | <i>0.011</i>          |
| I–H–*– $\pi^{(f)C}$ ( $C_1$ : IIA <sub>Cora:cc</sub> )                                        | 2.4387         | 2.4148         | 0.024                 |
| <i>H–I–*–<math>\pi^{(d)C}</math> (<math>C_1</math>: IIA<sub>Cora:cc</sub>)<sup>d</sup></i>    | <i>2.4387</i>  | <i>2.4148</i>  | <i>0.024</i>          |
| F–F–*– $\pi^{(a)C}$ ( $C_s$ : IIA <sub>Cora:cc</sub> )                                        | 3.0965         | 3.0747         | 0.022                 |
| <i>F–F–*–<math>\pi^{(d)C}</math> (<math>C_s</math>: IIA<sub>Cora:cc</sub>)<sup>d</sup></i>    | <i>3.0009</i>  | <i>2.9638</i>  | <i>0.037</i>          |
| Cl–Cl–*– $\pi^{(f)C}$ ( $C_1$ : IIA <sub>Cora:cc</sub> )                                      | 3.1816         | 3.1218         | 0.060                 |
| <i>Cl–Cl–*–<math>\pi^{(ij)M}</math> (<math>C_1</math>: IIA<sub>Cora:cc</sub>)<sup>d</sup></i> | <i>3.9133</i>  | <i>3.2127</i>  | <i>0.701</i>          |
| Br–Br–*– $\pi^{(a)C}$ ( $C_s$ : IIB <sub>Cora:cc</sub> )                                      | 3.2291         | 3.2100         | 0.019                 |
| <i>Br–Br–*–<math>\pi^{(d)C}</math> (<math>C_s</math>: IIB<sub>Cora:cc</sub>)<sup>d</sup></i>  | <i>3.8225</i>  | <i>3.8078</i>  | <i>0.015</i>          |
| <i>Br–Br–*–<math>\pi^{(g)C}</math> (<math>C_s</math>: IIB<sub>Cora:cc</sub>)<sup>d</sup></i>  | <i>3.8225</i>  | <i>3.8078</i>  | <i>0.015</i>          |
| I–I–*– $\pi^{(a)C}$ ( $C_s$ : IIB <sub>Cora:cc</sub> )                                        | 3.3618         | 3.3507         | 0.011                 |
| <i>I–I–*–<math>\pi^{(d)C}</math> (<math>C_s</math>: IIB<sub>Cora:cc</sub>)<sup>d</sup></i>    | <i>3.9632</i>  | <i>3.9223</i>  | <i>0.041</i>          |
| <i>I–I–*–<math>\pi^{(g)C}</math> (<math>C_s</math>: IIB<sub>Cora:cc</sub>)<sup>d</sup></i>    | <i>3.9632</i>  | <i>3.9223</i>  | <i>0.041</i>          |
| F–Cl–*– $\pi^{(a)C}$ ( $C_1$ : IA <sub>Cora:cc</sub> )                                        | 2.9661         | 2.9621         | 0.004                 |
| F–Br–*– $\pi^{(a)C}$ ( $C_1$ : IA <sub>Cora:cc</sub> )                                        | 3.0416         | 3.0397         | 0.002                 |
| F–I–*– $\pi^{(a)C}$ ( $C_s$ : IA <sub>Cora:cc</sub> )                                         | 3.1833         | 3.1824         | 0.001                 |

<sup>a</sup> See text for BSS-A. <sup>b</sup> The lengths of BPs. <sup>c</sup> Straight-line distances. <sup>d</sup>  $\Delta r_{BP} = r_{BP} - R_{SL}$ . <sup>d</sup> Data shown in italic correspond to the additional interaction.

**Table S5.** The  $r_{BP}$  and  $R_{SL}$  values evaluated with MP2/BSS-A for the optimized and observed structures of B-A- $\pi(C_{20}H_{10})$ , together with the  $\Delta r_{BP}$  values<sup>a</sup>

| Compound                                                 | $r_{BP}^b$ (Å) | $R_{SL}^c$ (Å) | $\Delta r_{BP}^d$ (Å) |
|----------------------------------------------------------|----------------|----------------|-----------------------|
| Convex side                                              |                |                |                       |
| F-H- $\pi^{(a)}C$ ( $C_{5v}$ : ID <sub>Cora:cv</sub> )   | 2.6264         | 2.5708         | 0.056                 |
| Cl-H- $\pi^{(a)}C$ ( $C_{5v}$ : ID <sub>Cora:cv</sub> )  | 2.5863         | 2.5469         | 0.039                 |
| Br-H- $\pi^{(a)}C$ ( $C_{5v}$ : ID <sub>Cora:cv</sub> )  | 2.5794         | 2.5436         | 0.036                 |
| I-H- $\pi^{(a)}C$ ( $C_{5v}$ : ID <sub>Cora:cv</sub> )   | 2.5664         | 2.5353         | 0.031                 |
| F-F- $\pi^{(a)}C$ ( $C_{5v}$ : ID <sub>Cora:cv</sub> )   | 3.0443         | 3.0163         | 0.028                 |
| Cl-Cl- $\pi^{(a)}C$ ( $C_{5v}$ : ID <sub>Cora:cv</sub> ) | 3.2257         | 3.2004         | 0.025                 |
| Br-Br- $\pi^{(a)}C$ ( $C_{5v}$ : ID <sub>Cora:cv</sub> ) | 3.2977         | 3.2801         | 0.018                 |
| I-I- $\pi^{(a)}C$ ( $C_{5v}$ : ID <sub>Cora:cv</sub> )   | 3.3932         | 3.3775         | 0.016                 |
| F-Cl- $\pi^{(a)}C$ ( $C_{5v}$ : ID <sub>Cora:cv</sub> )  | 3.2552         | 3.2162         | 0.039                 |
| F-Br- $\pi^{(a)}C$ ( $C_{5v}$ : ID <sub>Cora:cv</sub> )  | 3.2846         | 3.2595         | 0.025                 |
| F-I- $\pi^{(a)}C$ ( $C_{5v}$ : ID <sub>Cora:cv</sub> )   | 3.3401         | 3.3178         | 0.022                 |
| Concave side                                             |                |                |                       |
| F-H- $\pi^{(a)}C$ ( $C_{5v}$ : ID <sub>Cora:cc</sub> )   | 2.5357         | 2.4590         | 0.077                 |
| Cl-H- $\pi^{(a)}C$ ( $C_{5v}$ : ID <sub>Cora:cc</sub> )  | 2.4370         | 2.3858         | 0.051                 |
| Br-H- $\pi^{(a)}C$ ( $C_{5v}$ : ID <sub>Cora:cc</sub> )  | 2.4274         | 2.3802         | 0.047                 |
| I-H- $\pi^{(a)}C$ ( $C_{5v}$ : ID <sub>Cora:cc</sub> )   | 2.4180         | 2.3786         | 0.039                 |
| F-F- $\pi^{(a)}C$ ( $C_{5v}$ : ID <sub>Cora:cc</sub> )   | 2.9206         | 2.8966         | 0.024                 |
| Cl-Cl- $\pi^{(a)}C$ ( $C_{5v}$ : ID <sub>Cora:cc</sub> ) | 3.1061         | 3.0880         | 0.018                 |
| Br-Br- $\pi^{(a)}C$ ( $C_{5v}$ : ID <sub>Cora:cc</sub> ) | 3.1956         | 3.1861         | 0.010                 |
| I-I- $\pi^{(a)}C$ ( $C_{5v}$ : ID <sub>Cora:cc</sub> )   | 3.3271         | 3.3205         | 0.007                 |
| F-Cl- $\pi^{(a)}C$ ( $C_{5v}$ : ID <sub>Cora:cc</sub> )  | 3.1291         | 3.0974         | 0.032                 |
| F-Br- $\pi^{(a)}C$ ( $C_{5v}$ : ID <sub>Cora:cc</sub> )  | 3.1884         | 3.1713         | 0.017                 |
| F-I- $\pi^{(a)}C$ ( $C_{5v}$ : ID <sub>Cora:cc</sub> )   | 3.2987         | 3.2867         | 0.012                 |

<sup>a</sup> See text for BSS-A. <sup>b</sup> The lengths of BPs. <sup>c</sup> Straight-line distances. <sup>d</sup>  $\Delta r_{BP} = r_{BP} - R_{SL}$ .

**Table S6.** The structural parameters for the H-\* $\pi$  and X-\* $\pi$  interactions with  $\pi(\text{C}_{20}\text{H}_{10})$ ,  $\pi(\text{C}_{24}\text{H}_{12})$  and  $\pi(\text{C}_6\text{H}_6)$ , (X = F, Cl, Br and I), evaluated with MP2/BSS-A,<sup>a</sup> together with the values from the corresponding ones of the adducts with  $\pi(\text{C}_6\text{H}_6)$ , respectively

| species                                                                 | $r_1$<br>(Å) | $r_2$<br>(Å) | $\theta_1$<br>(°) | $\theta_2$<br>(°) | $\phi_1$<br>(°) | $\phi_2$<br>(°) |
|-------------------------------------------------------------------------|--------------|--------------|-------------------|-------------------|-----------------|-----------------|
| Convex side                                                             |              |              |                   |                   |                 |                 |
| F-H-* $\pi^{(sM)}$ ( $C_{5v}$ : ID <sub>Cora:cv</sub> ) <sup>b</sup>    | 2.2724       | 0.9241       | 90.00             | 180.00            | -90.00          | 83.12           |
| Cl-H-* $\pi^{(sM)}$ ( $C_{5v}$ : ID <sub>Cora:cv</sub> ) <sup>b</sup>   | 2.2455       | 1.2818       | 90.00             | 180.00            | -90.00          | 162.89          |
| Br-H-* $\pi^{(sM)}$ ( $C_{5v}$ : ID <sub>Cora:cv</sub> ) <sup>b</sup>   | 2.2418       | 1.4199       | 90.00             | 180.00            | -90.00          | -93.61          |
| I-H-* $\pi^{(sM)}$ ( $C_{5v}$ : ID <sub>Cora:cv</sub> ) <sup>b</sup>    | 2.2324       | 1.6142       | 90.00             | 180.00            | -90.00          | 135.83          |
| F-F-* $\pi^{(sM)}$ ( $C_{5v}$ : ID <sub>Cora:cv</sub> ) <sup>b</sup>    | 2.7666       | 1.4031       | 90.00             | 180.00            | -90.00          | 88.63           |
| Cl-Cl-* $\pi^{(sM)}$ ( $C_{5v}$ : ID <sub>Cora:cv</sub> ) <sup>b</sup>  | 2.9662       | 1.9921       | 90.00             | 180.00            | -90.00          | -102.14         |
| Br-Br-* $\pi^{(sM)}$ ( $C_{5v}$ : ID <sub>Cora:cv</sub> ) <sup>b</sup>  | 3.0521       | 2.2791       | 90.00             | 180.00            | -90.00          | -42.80          |
| I-I-* $\pi^{(sM)}$ ( $C_{5v}$ : ID <sub>Cora:cv</sub> ) <sup>b</sup>    | 3.1566       | 2.6678       | 90.00             | 180.00            | -90.00          | -65.30          |
| F-Cl-* $\pi^{(sM)}$ ( $C_{5v}$ : ID <sub>Cora:cv</sub> ) <sup>b</sup>   | 2.9832       | 1.6442       | 90.00             | 180.00            | -90.00          | 83.81           |
| F-Br-* $\pi^{(sM)}$ ( $C_{5v}$ : ID <sub>Cora:cv</sub> ) <sup>b</sup>   | 3.0299       | 1.7783       | 90.00             | 180.00            | -90.00          | 141.67          |
| F-I-* $\pi^{(sM)}$ ( $C_{5v}$ : ID <sub>Cora:cv</sub> ) <sup>b</sup>    | 3.0925       | 1.9340       | 90.00             | 180.00            | -90.00          | 119.25          |
| Concave side                                                            |              |              |                   |                   |                 |                 |
| F-H-* $\pi^{(sM)}$ ( $C_{5v}$ : ID <sub>Cora:cc</sub> ) <sup>b</sup>    | 2.1444       | 0.9249       | 90.00             | 180.00            | 90.00           | -121.02         |
| Cl-H-* $\pi^{(sM)}$ ( $C_{5v}$ : ID <sub>Cora:cc</sub> ) <sup>b</sup>   | 2.0599       | 1.2835       | 90.00             | 180.00            | 90.00           | -134.23         |
| Br-H-* $\pi^{(sM)}$ ( $C_{5v}$ : ID <sub>Cora:cc</sub> ) <sup>b</sup>   | 2.0534       | 1.4216       | 90.00             | 180.00            | 90.00           | 145.32          |
| I-H-* $\pi^{(sM)}$ ( $C_{5v}$ : ID <sub>Cora:cc</sub> ) <sup>b</sup>    | 2.0514       | 1.6121       | 90.00             | 180.00            | 90.00           | 61.10           |
| F-F-* $\pi^{(sM)}$ ( $C_{5v}$ : ID <sub>Cora:cc</sub> ) <sup>b</sup>    | 2.6351       | 1.4038       | 90.00             | 180.00            | 90.00           | -81.04          |
| Cl-Cl-* $\pi^{(sM)}$ ( $C_{5v}$ : ID <sub>Cora:cc</sub> ) <sup>b</sup>  | 2.8438       | 1.9914       | 90.00             | 180.00            | 90.00           | 114.89          |
| Br-Br-* $\pi^{(sM)}$ ( $C_{5v}$ : ID <sub>Cora:cc</sub> ) <sup>b</sup>  | 2.9501       | 2.2781       | 90.00             | 180.00            | 90.00           | -36.00          |
| I-I-* $\pi^{(sM)}$ ( $C_{5v}$ : ID <sub>Cora:cc</sub> ) <sup>b</sup>    | 3.0951       | 2.6650       | 90.00             | 180.00            | 90.00           | -48.94          |
| F-Cl-* $\pi^{(sM)}$ ( $C_{5v}$ : ID <sub>Cora:cc</sub> ) <sup>b</sup>   | 2.8541       | 1.6461       | 90.00             | 180.00            | 90.00           | -77.74          |
| F-Br-* $\pi^{(sM)}$ ( $C_{5v}$ : ID <sub>Cora:cc</sub> ) <sup>b</sup>   | 2.9342       | 1.7798       | 90.00             | 180.00            | 90.00           | -135.79         |
| F-I-* $\pi^{(sM)}$ ( $C_{5v}$ : ID <sub>Cora:cc</sub> ) <sup>b</sup>    | 3.0588       | 1.9348       | 90.00             | 180.00            | 90.00           | 77.56           |
| Y-X-* $\pi(\text{C}_{24}\text{H}_{12})$                                 |              |              |                   |                   |                 |                 |
| F-H-* $\pi(\text{M}_o)$ ( $C_{6v}$ : ID <sub>Cor</sub> ) <sup>b</sup>   | 2.2261       | 0.9239       | 90.00             | 180.00            | -90.00          | -23.31          |
| Cl-H-* $\pi(\text{M}_o)$ ( $C_{6v}$ : ID <sub>Cor</sub> ) <sup>b</sup>  | 2.1648       | 1.2815       | 90.00             | 180.00            | -90.00          | 141.49          |
| Br-H-* $\pi(\text{M}_o)$ ( $C_{6v}$ : ID <sub>Cor</sub> ) <sup>b</sup>  | 2.1555       | 1.4197       | 90.00             | 180.00            | -90.00          | -180.00         |
| I-H-* $\pi(\text{M}_o)$ ( $C_{6v}$ : ID <sub>Cor</sub> ) <sup>b</sup>   | 2.1348       | 1.6139       | 90.00             | 180.00            | -90.00          | 87.85           |
| F-F-* $\pi(\text{M}_o)$ ( $C_{6v}$ : ID <sub>Cor</sub> ) <sup>b</sup>   | 2.7234       | 1.4027       | 90.00             | 180.00            | -90.00          | 150.12          |
| Cl-Cl-* $\pi(\text{M}_o)$ ( $C_{6v}$ : ID <sub>Cor</sub> ) <sup>b</sup> | 2.9193       | 1.9913       | 90.00             | 180.00            | -90.00          | 93.40           |
| Br-Br-* $\pi(\text{M}_o)$ ( $C_{6v}$ : ID <sub>Cor</sub> ) <sup>b</sup> | 3.0091       | 2.2781       | 90.00             | 180.00            | -90.00          | 180.00          |
| I-I-* $\pi(\text{M}_o)$ ( $C_{6v}$ : ID <sub>Cor</sub> ) <sup>b</sup>   | 3.1252       | 2.6662       | 90.00             | 180.00            | -90.00          | 0.00            |
| F-Cl-* $\pi(\text{M}_o)$ ( $C_{6v}$ : ID <sub>Cor</sub> ) <sup>b</sup>  | 2.9516       | 1.6436       | 90.00             | 180.00            | -90.00          | -94.92          |
| F-Br-* $\pi(\text{M}_o)$ ( $C_{6v}$ : ID <sub>Cor</sub> ) <sup>b</sup>  | 3.0072       | 1.7776       | 90.00             | 180.00            | -90.00          | 105.76          |
| F-I-* $\pi(\text{M}_o)$ ( $C_{6v}$ : ID <sub>Cor</sub> ) <sup>b</sup>   | 3.0898       | 1.9332       | 90.00             | 180.00            | -90.00          | 180.00          |
| Y-X-* $\pi(\text{C}_6\text{H}_6)$                                       |              |              |                   |                   |                 |                 |
| F-H-* $\pi(\text{M}_o)$ ( $C_{6v}$ : ID <sub>Bzn</sub> ) <sup>b</sup>   | 2.2223       | 0.9250       | 90.00             | 180.00            | 90.00           | -69.61          |
| Cl-H-* $\pi(\text{M}_o)$ ( $C_{6v}$ : ID <sub>Bzn</sub> ) <sup>b</sup>  | 2.2422       | 1.2826       | 90.00             | 180.00            | 90.00           | -52.40          |
| Br-H-* $\pi(\text{M}_o)$ ( $C_{6v}$ : ID <sub>Bzn</sub> ) <sup>b</sup>  | 2.2605       | 1.4206       | 90.00             | 180.00            | 90.00           | -171.08         |
| I-H-* $\pi(\text{M}_o)$ ( $C_{6v}$ : ID <sub>Bzn</sub> ) <sup>b</sup>   | 2.2749       | 1.6151       | 90.00             | 180.00            | 90.00           | 119.98          |
| F-F-* $\pi(\text{M}_o)$ ( $C_{6v}$ : ID <sub>Bzn</sub> ) <sup>b</sup>   | 2.9041       | 1.4013       | 90.00             | 180.00            | 90.00           | -68.01          |
| Cl-Cl-* $\pi(\text{M}_o)$ ( $C_{6v}$ : ID <sub>Bzn</sub> ) <sup>b</sup> | 3.1058       | 1.9901       | 90.00             | 180.00            | 90.00           | 55.03           |
| Br-Br-* $\pi(\text{M}_o)$ ( $C_{6v}$ : ID <sub>Bzn</sub> ) <sup>b</sup> | 3.2256       | 2.2754       | 90.00             | 180.00            | 90.00           | 104.17          |
| I-I-* $\pi(\text{M}_o)$ ( $C_{6v}$ : ID <sub>Bzn</sub> ) <sup>b</sup>   | 3.3740       | 2.6623       | 90.00             | 180.00            | 90.00           | -129.82         |
| F-Cl-* $\pi(\text{M}_o)$ ( $C_{6v}$ : ID <sub>Bzn</sub> ) <sup>b</sup>  | 3.1210       | 1.6420       | 90.00             | 180.00            | 90.00           | 49.37           |
| F-Br-* $\pi(\text{M}_o)$ ( $C_{6v}$ : ID <sub>Bzn</sub> ) <sup>b</sup>  | 3.2037       | 1.7748       | 90.00             | 180.00            | 90.00           | 53.37           |
| F-I-* $\pi(\text{M}_o)$ ( $C_{6v}$ : ID <sub>Bzn</sub> ) <sup>b</sup>   | 3.3184       | 1.9301       | 90.00             | 180.00            | 90.00           | -130.35         |

<sup>a</sup> See text for BSS-A. <sup>b</sup> Two imaginary frequencies being predicted for each.

**Table S7.** QTAIM functions and QTAIM-DFA parameters for X-H-\* $\pi$ (C<sub>20</sub>H<sub>10</sub>) and Y-X-\* $\pi$ (C<sub>20</sub>H<sub>10</sub>) (X, Y = F, Cl, Br, and I) on concave side, evaluated with MP2/BSS-A<sup>1,2</sup> with NIV

| Y-X-* $\pi$ (C <sub>20</sub> H <sub>10</sub> )<br>(symmetry: type)                      | $\rho_b(r_c)$<br>( <i>ea</i> <sub>0</sub> <sup>-3</sup> ) | $c\nabla^2\rho_b(r_c)^3$<br>(au) | $H_b(r_c)$<br>(au) | $R^4$<br>(au) | $\theta^5$<br>(°) | freq<br>(cm <sup>-1</sup> ) | $\theta_p^6$<br>(°) | $\kappa_p^7$<br>(au <sup>-1</sup> ) | Predicted<br>nature                      |
|-----------------------------------------------------------------------------------------|-----------------------------------------------------------|----------------------------------|--------------------|---------------|-------------------|-----------------------------|---------------------|-------------------------------------|------------------------------------------|
| Concave side                                                                            |                                                           |                                  |                    |               |                   |                             |                     |                                     |                                          |
| F-H-* $\pi$ ( <sup>a</sup> C) (C <sub>1</sub> : IAC <sub>Coracc</sub> )                 | 0.0144                                                    | 0.0065                           | 0.0021             | 0.0068        | 72.0              | 100.0                       | 100.2               | 282.2                               | <i>p</i> -CS/ <i>t</i> -HB <sub>nc</sub> |
| Cl-H-* $\pi$ ( <sup>a</sup> C) (C <sub>s</sub> : IIA <sub>Coracc</sub> )                | 0.0162                                                    | 0.0064                           | 0.0015             | 0.0065        | 76.9              | 77.7                        | 125.4               | 955.4                               | <i>p</i> -CS/ <i>t</i> -HB <sub>nc</sub> |
| H-Cl-* $\pi$ ( <sup>c</sup> C) (C <sub>s</sub> : IIA <sub>Coracc</sub> ) <sup>9</sup>   | 0.0083                                                    | 0.0038                           | 0.0013             | 0.0040        | 71.1              | 77.7                        | 89.9                | 4888                                | <i>p</i> -CS/ <i>v</i> <i>d</i> <i>w</i> |
| Br-H-* $\pi$ ( <sup>a</sup> C) (C <sub>1</sub> : IIA <sub>Coracc</sub> )                | 0.0174                                                    | 0.0065                           | 0.0014             | 0.0066        | 78.2              | 59.0                        | 137.7               | 1830                                | <i>p</i> -CS/ <i>t</i> -HB <sub>nc</sub> |
| H-Br-* $\pi$ ( <sup>c</sup> C) (C <sub>1</sub> : IIA <sub>Coracc</sub> ) <sup>9</sup>   | 0.0082                                                    | 0.0036                           | 0.0012             | 0.0038        | 71.6              | 59.0                        | 101.4               | 10580                               | <i>p</i> -CS/ <i>t</i> -HB <sub>nc</sub> |
| I-H-* $\pi$ ( <sup>i</sup> C) (C <sub>1</sub> : IIA <sub>Coracc</sub> )                 | 0.0172                                                    | 0.0062                           | 0.0012             | 0.0063        | 78.9              | 53.5                        | 92.2                | 344.1                               | <i>p</i> -CS/ <i>t</i> -HB <sub>nc</sub> |
| I-H-* $\pi$ ( <sup>c</sup> C) (C <sub>1</sub> : IIA <sub>Coracc</sub> ) <sup>9</sup>    | 0.0086                                                    | 0.0031                           | 0.0008             | 0.0032        | 75.1              | 53.5                        | 85.0                | 8.0                                 | <i>p</i> -CS/ <i>v</i> <i>d</i> <i>w</i> |
| F-F-* $\pi$ ( <sup>a</sup> C) (C <sub>s</sub> : IIA <sub>Coracc</sub> )                 | 0.0093                                                    | 0.0048                           | 0.0012             | 0.0050        | 76.3              | 76.2                        | 89.3                | 305.2                               | <i>p</i> -CS/ <i>v</i> <i>d</i> <i>w</i> |
| F-F-* $\pi$ ( <sup>c</sup> C) (C <sub>s</sub> : IIA <sub>Coracc</sub> ) <sup>9</sup>    | 0.0077                                                    | 0.0041                           | 0.0011             | 0.0043        | 74.9              | 76.2                        | 83.3                | 7.4                                 | <i>p</i> -CS/ <i>v</i> <i>d</i> <i>w</i> |
| Cl-Cl-* $\pi$ ( <sup>i</sup> C) (C <sub>1</sub> : IIA <sub>Coracc</sub> )               | 0.0118                                                    | 0.0054                           | 0.0017             | 0.0056        | 72.8              | 97.0                        | 84.5                | 94.5                                | <i>p</i> -CS/ <i>v</i> <i>d</i> <i>w</i> |
| Cl-Cl-* $\pi$ ( <sup>ij</sup> M) (C <sub>1</sub> : IIA <sub>Coracc</sub> ) <sup>9</sup> | 0.0099                                                    | 0.0042                           | 0.0015             | 0.0045        | 71.0              | 95.4                        | 76.5                | 69.3                                | <i>p</i> -CS/ <i>v</i> <i>d</i> <i>w</i> |
| Br-Br-* $\pi$ ( <sup>a</sup> C) (C <sub>s</sub> : IIB <sub>Coracc</sub> )               | 0.0124                                                    | 0.0054                           | 0.0014             | 0.0056        | 75.4              | 76.0                        | 88.5                | 98.1                                | <i>p</i> -CS/ <i>v</i> <i>d</i> <i>w</i> |
| Br-Br-* $\pi$ ( <sup>i</sup> C) (C <sub>s</sub> : IIB <sub>Coracc</sub> ) <sup>9</sup>  | 0.0046                                                    | 0.0018                           | 0.0007             | 0.0019        | 68.8              | 44.8                        | 71.5                | 37.6                                | <i>p</i> -CS/ <i>v</i> <i>d</i> <i>w</i> |
| I-I-* $\pi$ ( <sup>a</sup> C) (C <sub>s</sub> : IIB <sub>Coracc</sub> )                 | 0.0130                                                    | 0.0049                           | 0.0010             | 0.0050        | 78.7              | 70.9                        | 94.1                | 136.2                               | <i>p</i> -CS/ <i>t</i> -HB <sub>nc</sub> |
| I-I-* $\pi$ ( <sup>d</sup> C) (C <sub>s</sub> : IIB <sub>Coracc</sub> ) <sup>9</sup>    | 0.0111                                                    | 0.0045                           | 0.0011             | 0.0046        | 76.5              | 70.9                        | 87.7                | 102.1                               | <i>p</i> -CS/ <i>v</i> <i>d</i> <i>w</i> |
| I-I-* $\pi$ ( <sup>g</sup> C) (C <sub>s</sub> : IIB <sub>Coracc</sub> ) <sup>9</sup>    | 0.0050                                                    | 0.0017                           | 0.0006             | 0.0018        | 71.0              | 44.7                        | 75.6                | 58.4                                | <i>p</i> -CS/ <i>v</i> <i>d</i> <i>w</i> |
| F-Cl-* $\pi$ ( <sup>a</sup> C) (C <sub>1</sub> : IAC <sub>Coracc</sub> )                | 0.0137                                                    | 0.0065                           | 0.0017             | 0.0067        | 75.6              | 95.4                        | 93.8                | 131.4                               | <i>p</i> -CS/ <i>t</i> -HB <sub>nc</sub> |
| F-Br-* $\pi$ ( <sup>a</sup> C) (C <sub>1</sub> : IAC <sub>Coracc</sub> )                | 0.0139                                                    | 0.0061                           | 0.0014             | 0.0062        | 76.9              | 79.2                        | 97.1                | 168.1                               | <i>p</i> -CS/ <i>t</i> -HB <sub>nc</sub> |
| F-I-* $\pi$ ( <sup>a</sup> C) (C <sub>s</sub> : IAC <sub>Coracc</sub> )                 | 0.0141                                                    | 0.0054                           | 0.0008             | 0.0054        | 81.1              | 76.0                        | 107.7               | 228.9                               | <i>p</i> -CS/ <i>t</i> -HB <sub>nc</sub> |

<sup>1</sup> See text for BSS-A. <sup>2</sup> Data are given at BCP, which is shown by A-\* $\pi$ , where one side interaction is shown if two are identical due to symmetry. <sup>3</sup>  $c\nabla^2\rho_b(r_c) = H_b(r_c) - V_b(r_c)/2$ , where  $c = \hbar^2/8m$ . <sup>4</sup>  $R = (x^2 + y^2)^{1/2}$ , where  $(x, y) = (H_b(r_c) - V_b(r_c)/2, H_b(r_c))$ . <sup>5</sup>  $\theta = 90^\circ - \tan^{-1}(y/x)$ . <sup>6</sup>  $\theta_p = 90^\circ - \tan^{-1}(dy/dx)$ . <sup>7</sup>  $\kappa_p = |d^2y/dx^2|/[1 + (dy/dx)^2]^{3/2}$ . <sup>8</sup> Perturbed structures are generated employing  $w = -0.05, -0.025, (0), 0.025$ , and  $0.05$  in Equation (4) of the text. <sup>9</sup> Data shown in italics correspond to the additional interaction.

The nature of the additional interactions on the concave side, given in Table S7 in italics, are similarly calculated. The additional interactions are weaker than the corresponding original interactions based on the QTAIM-DFA parameters listed in Table S7. The predicted nature for the additional interactions are weaker than that for the original one for H-Cl-\* $\pi$ (<sup>c</sup>C) versus Cl-H-\* $\pi$ (<sup>a</sup>C) (C<sub>s</sub>: IIA<sub>Coracc</sub>) and H-I-\* $\pi$ (<sup>c</sup>C) versus I-H-\* $\pi$ (<sup>i</sup>C) (C<sub>s</sub>: IIA<sub>Coracc</sub>), while the same nature is predicted for H-Br-\* $\pi$ (<sup>c</sup>C) versus Br-H-\* $\pi$ (<sup>a</sup>C) (C<sub>s</sub>: IIA<sub>Coracc</sub>), F-F'-\* $\pi$ (<sup>c</sup>C) versus F'-F-\* $\pi$ (<sup>a</sup>C) (C<sub>s</sub>: IIA<sub>Coracc</sub>), Br-Br'-\* $\pi$ (<sup>i</sup>C) versus Br'-Br-\* $\pi$ (<sup>a</sup>C) (C<sub>s</sub>: IIA<sub>Coracc</sub>) and I-I'-\* $\pi$ (<sup>d</sup>C) versus I-I'-\* $\pi$ (<sup>g</sup>C) (The additional interactions seem to appear depending on the relative sizes of X-H, X-X, and cc of  $\pi$ (C<sub>20</sub>H<sub>10</sub>) in the adducts, together with the interaction ability of X.

**Table S8.**  $C_{ii}$  and  $\Delta E$  for X–H–\*– $\pi$ (C<sub>20</sub>H<sub>10</sub>) and Y–X–\*– $\pi$ (C<sub>20</sub>H<sub>10</sub>) (X, Y = F, Cl, Br, and I), evaluated with MP2/BSS-A,<sup>a</sup> employing the perturbed structures generated with CIV

| Compound                                                       | $C_{ii}$<br>(Å mdyne <sup>-1</sup> ) | $\Sigma_k C_{ii}^{-1} k^b$<br>(mdyn Å <sup>-1</sup> ) | $\Delta E_{ES}$<br>(kJ mol <sup>-1</sup> ) |
|----------------------------------------------------------------|--------------------------------------|-------------------------------------------------------|--------------------------------------------|
| Convex side (with CIV)                                         |                                      |                                                       |                                            |
| F–H–*– $\pi$ ( <sup>a</sup> C) (C <sub>1</sub> : IACora:cv)    | 17.674                               | 0.05658                                               | -23.4                                      |
| F–F–*– $\pi$ ( <sup>a</sup> C) (C <sub>s</sub> : IACora:cv)    | 9.004                                | 0.111062                                              | -17.0                                      |
| Cl–Cl–*– $\pi$ ( <sup>a</sup> C) (C <sub>s</sub> : IACora:cv)  | 4.795                                | 0.208551                                              | -36.6                                      |
| Br–Br–*– $\pi$ ( <sup>a</sup> C) (C <sub>s</sub> : IACora:cv)  | 4.197                                | 0.238265                                              | -43.0                                      |
| I–I–*– $\pi$ ( <sup>a</sup> C) (C <sub>s</sub> : IACora:cv)    | 3.828                                | 0.261233                                              | -48.6                                      |
| F–Cl–*– $\pi$ ( <sup>a</sup> C) (C <sub>s</sub> : IACora:cv)   | 4.321                                | 0.231428                                              | -41.4                                      |
| F–Br–*– $\pi$ ( <sup>a</sup> C) (C <sub>s</sub> : IACora:cv)   | 3.036                                | 0.329381                                              | -53.2                                      |
| F–I–*– $\pi$ ( <sup>a</sup> C) (C <sub>1</sub> : IACora:cv)    | 2.487                                | 0.402091                                              | -64.3                                      |
| Concave side (with CIV)                                        |                                      |                                                       |                                            |
| F–H–*– $\pi$ ( <sup>a</sup> C) (C <sub>1</sub> : IACora:cc)    | 8.175                                | 0.122324                                              | -27.8                                      |
| Cl–H–*– $\pi$ ( <sup>a</sup> C) (C <sub>s</sub> : IIAcora:cc)  | 31.667, 9.879, 9.879                 | 0.234028                                              | -44.7                                      |
| Br–H–*– $\pi$ ( <sup>a</sup> C) (C <sub>1</sub> : IIAcora:cc)  | 34.149, 8.662, 8.662                 | 0.260177                                              | -49.2                                      |
| I–H–*– $\pi$ ( <sup>f</sup> C) (C <sub>1</sub> : IIAcora:cc)   | 57.414, 8.001, 8.001                 | 0.267386                                              | -12.3                                      |
| F–F–*– $\pi$ ( <sup>a</sup> C) (C <sub>s</sub> : IIAcora:cc)   | 12.665, 18.106, 18.106               | 0.189418                                              | -28.5                                      |
| Br–Br–*– $\pi$ ( <sup>a</sup> C) (C <sub>s</sub> : IIBcora:cc) | 80.397, 80.397, 24.007, 9.442, 9.442 | 0.278351                                              | -62.8                                      |
| I–I–*– $\pi$ ( <sup>a</sup> C) (C <sub>s</sub> : IIBcora:cc)   | 40.039, 40.039, 6.620, 4.975, 4.975  | 0.603019                                              | -70.9                                      |
| F–Cl–*– $\pi$ ( <sup>a</sup> C) (C <sub>1</sub> : IACora:cc)   | 6.162                                | 0.162285                                              | -48.5                                      |
| F–Br–*– $\pi$ ( <sup>a</sup> C) (C <sub>1</sub> : IACora:cc)   | 5.875                                | 0.170213                                              | -55.1                                      |
| F–I–*– $\pi$ ( <sup>a</sup> C) (C <sub>s</sub> : IACora:cc)    | 5.412                                | 0.184775                                              | -63.2                                      |

<sup>a</sup> See text for BSS-A. <sup>b</sup> Calculated according to Equation (18) in the text.



**Table S9.** QTAIM functions and QTAIM-DFA parameters for X-H- $\pi$ (C<sub>20</sub>H<sub>10</sub>) and Y-X- $\pi$ (C<sub>20</sub>H<sub>10</sub>) (X, Y = F, Cl, Br and I) ( $C_{5v}$ : ID<sub>Cora:cv</sub> and ID<sub>Cora:cc</sub>), evaluated with MP2/BSS-A<sup>a,b</sup>

| Y-X- $\pi$ (C <sub>20</sub> H <sub>10</sub> )<br>(symm: type) | $\rho_b(\mathbf{r}_c)$<br>( $ea_0^{-3}$ ) | $c\nabla^2\rho_b(\mathbf{r}_c)^c$<br>(au) | $H_b(\mathbf{r}_c)$<br>(au) | $R^d$<br>(au) | $\theta^e$<br>(°) | freq<br>(cm <sup>-1</sup> ) | $\theta_p^f$<br>(°) | $\kappa_p^g$<br>(au <sup>-1</sup> ) | predicted<br>nature                      |
|---------------------------------------------------------------|-------------------------------------------|-------------------------------------------|-----------------------------|---------------|-------------------|-----------------------------|---------------------|-------------------------------------|------------------------------------------|
| Convex side ( $C_{5v}$ : ID <sub>Cora:cv</sub> )              |                                           |                                           |                             |               |                   |                             |                     |                                     |                                          |
| F-H- $\pi$ ( <sup>a</sup> C) <sup>h</sup>                     | 0.0079                                    | 0.0039                                    | 0.0017                      | 0.0042        | 66.1              | 91.3                        | 68.9                | 64.2                                | <i>p</i> -CS/vdW                         |
| Cl-H- $\pi$ ( <sup>a</sup> C) <sup>h</sup>                    | 0.0098                                    | 0.0044                                    | 0.0015                      | 0.0046        | 71.5              | 78.9                        | 74.4                | 57.0                                | <i>p</i> -CS/vdW                         |
| Br-H- $\pi$ ( <sup>a</sup> C) <sup>h</sup>                    | 0.0104                                    | 0.0045                                    | 0.0014                      | 0.0047        | 72.5              | 58.6                        | 75.8                | 57.5                                | <i>p</i> -CS/vdW                         |
| I-H- $\pi$ ( <sup>a</sup> C) <sup>h</sup>                     | 0.0111                                    | 0.0047                                    | 0.0014                      | 0.0049        | 73.6              | 51.1                        | 77.7                | 57.4                                | <i>p</i> -CS/vdW                         |
| F-F- $\pi$ ( <sup>a</sup> C) <sup>h</sup>                     | 0.0067                                    | 0.0038                                    | 0.0014                      | 0.0041        | 70.5              | 70.6                        | 73.5                | 9.8                                 | <i>p</i> -CS/vdW                         |
| Cl-Cl- $\pi$ ( <sup>a</sup> C) <sup>h</sup>                   | 0.0090                                    | 0.0044                                    | 0.0017                      | 0.0047        | 69.3              | 70.2                        | 78.0                | 74.7                                | <i>p</i> -CS/vdW                         |
| Br-Br- $\pi$ ( <sup>a</sup> C) <sup>h</sup>                   | 0.0094                                    | 0.0042                                    | 0.0014                      | 0.0044        | 71.0              | 54.0                        | 80.6                | 88.6                                | <i>p</i> -CS/vdW                         |
| I-I- $\pi$ ( <sup>a</sup> C) <sup>h</sup>                     | 0.0107                                    | 0.0042                                    | 0.0011                      | 0.0043        | 74.9              | 50.7                        | 87.6                | 120.1                               | <i>p</i> -CS/vdW                         |
| F-Cl- $\pi$ ( <sup>a</sup> C) <sup>h</sup>                    | 0.0084                                    | 0.0041                                    | 0.0015                      | 0.0044        | 69.6              | 74.1                        | 77.6                | 75.5                                | <i>p</i> -CS/vdW                         |
| F-Br- $\pi$ ( <sup>a</sup> C) <sup>h</sup>                    | 0.0094                                    | 0.0041                                    | 0.0014                      | 0.0044        | 71.7              | 62.6                        | 81.3                | 95.0                                | <i>p</i> -CS/vdW                         |
| F-I- $\pi$ ( <sup>a</sup> C) <sup>f</sup>                     | 0.0113                                    | 0.0043                                    | 0.0010                      | 0.0045        | 76.5              | 74.6                        | 90.8                | 133.9                               | <i>p</i> -CS/ <i>t</i> -HB <sub>nc</sub> |
| Concave side ( $C_{5v}$ : ID <sub>Cora:cc</sub> )             |                                           |                                           |                             |               |                   |                             |                     |                                     |                                          |
| F-H- $\pi$ ( <sup>a</sup> C) <sup>h</sup>                     | 0.0104                                    | 0.0054                                    | 0.0021                      | 0.0058        | 68.2              | 100.4                       | 76.0                | 91.4                                | <i>p</i> -CS/vdW                         |
| Cl-H- $\pi$ ( <sup>a</sup> C) <sup>h</sup>                    | 0.0143                                    | 0.0066                                    | 0.0018                      | 0.0068        | 74.8              | 98.5                        | 84.8                | 100.6                               | <i>p</i> -CS/vdW                         |
| Br-H- $\pi$ ( <sup>a</sup> C) <sup>h</sup>                    | 0.0151                                    | 0.0067                                    | 0.0017                      | 0.0069        | 75.9              | 74.5                        | 86.8                | 104.9                               | <i>p</i> -CS/vdW                         |
| I-H- $\pi$ ( <sup>a</sup> C) <sup>h</sup>                     | 0.0160                                    | 0.0069                                    | 0.0015                      | 0.0071        | 77.8              | 66.1                        | 88.1                | 100.0                               | <i>p</i> -CS/vdW                         |
| F-F- $\pi$ ( <sup>a</sup> C) <sup>h</sup>                     | 0.0090                                    | 0.0053                                    | 0.0017                      | 0.0056        | 72.7              | 87.2                        | 75.7                | 10.2                                | <i>p</i> -CS/vdW                         |
| Cl-Cl- $\pi$ ( <sup>a</sup> C) <sup>h</sup>                   | 0.0117                                    | 0.0059                                    | 0.0018                      | 0.0062        | 72.9              | 88.7                        | 85.5                | 61.8                                | <i>p</i> -CS/vdW                         |
| Br-Br- $\pi$ ( <sup>a</sup> C) <sup>h</sup>                   | 0.0117                                    | 0.0053                                    | 0.0015                      | 0.0056        | 74.0              | 67.9                        | 86.7                | 78.7                                | <i>p</i> -CS/vdW                         |
| I-I- $\pi$ ( <sup>a</sup> C) <sup>h</sup>                     | 0.0124                                    | 0.0049                                    | 0.0011                      | 0.0050        | 77.6              | 63.1                        | 93.4                | 134.8                               | <i>p</i> -CS/ <i>t</i> -HB <sub>nc</sub> |
| F-Cl- $\pi$ ( <sup>a</sup> C) <sup>h</sup>                    | 0.0112                                    | 0.0055                                    | 0.0017                      | 0.0058        | 73.1              | 93.5                        | 83.8                | 82.1                                | <i>p</i> -CS/vdW                         |
| F-Br- $\pi$ ( <sup>a</sup> C) <sup>h</sup>                    | 0.0115                                    | 0.0052                                    | 0.0014                      | 0.0054        | 74.5              | 78.2                        | 86.4                | 79.6                                | <i>p</i> -CS/vdW                         |
| F-I- $\pi$ ( <sup>a</sup> C) <sup>h</sup>                     | 0.0124                                    | 0.0049                                    | 0.0010                      | 0.0050        | 78.5              | 60.8                        | 94.6                | 147.1                               | <i>p</i> -CS/ <i>t</i> -HB <sub>nc</sub> |

<sup>a</sup> See text for BSS-A. <sup>b</sup> Data are given at BCP, which is shown by A- $\pi$ , where one side interaction is shown if two are identical due to the symmetry. <sup>c</sup>  $c\nabla^2\rho_b(\mathbf{r}_c) = H_b(\mathbf{r}_c) - V_b(\mathbf{r}_c)/2$ , where  $c = \hbar^2/8m$ . <sup>d</sup>  $R = (x^2 + y^2)^{1/2}$ , where  $(x, y) = (H_b(\mathbf{r}_c) - V_b(\mathbf{r}_c)/2, H_b(\mathbf{r}_c))$ . <sup>e</sup>  $\theta = 90^\circ - \tan^{-1}(y/x)$ , where  $(x, y) = (H_b(\mathbf{r}_c) - V_b(\mathbf{r}_c)/2, H_b(\mathbf{r}_c))$ . <sup>f</sup>  $\theta_p = 90^\circ - \tan^{-1}(dy/dx)$ . <sup>g</sup>  $\kappa_p = |d^2y/dx^2|/[1 + (dy/dx)^2]^{3/2}$ . <sup>h</sup> Two imaginary frequencies being predicted for each.

**Table S10.** QTAIM functions and QTAIM-DFA parameters for X-H- $\pi$ (C<sub>24</sub>H<sub>12</sub>) and Y-X- $\pi$ (C<sub>24</sub>H<sub>12</sub>) (X, Y = F, Cl, Br and I) ( $C_{6v}$ : ID<sub>Cor</sub> and ID<sub>Cor</sub>), evaluated with MP2/BSS-A<sup>a,b</sup>

| Y-X- $\pi$ (C <sub>20</sub> H <sub>10</sub> )<br>(symm: type) | $\rho_b(\mathbf{r}_c)$<br>( $ea_0^{-3}$ ) | $c\nabla^2\rho_b(\mathbf{r}_c)^c$<br>(au) | $H_b(\mathbf{r}_c)$<br>(au) | $R^d$<br>(au) | $\theta^e$<br>(°) | freq<br>(cm <sup>-1</sup> ) | $\theta_p^f$<br>(°) | $\kappa_p^g$<br>(au <sup>-1</sup> ) | predicted<br>nature |
|---------------------------------------------------------------|-------------------------------------------|-------------------------------------------|-----------------------------|---------------|-------------------|-----------------------------|---------------------|-------------------------------------|---------------------|
| F-H- $\pi$ ( $C_{6v}$ : ID <sub>Cor</sub> ) <sup>h</sup>      | 0.0071                                    | 0.0033                                    | 0.0014                      | 0.0036        | 67.0              | 84.2                        | 68.8                | 60.5                                | <i>p</i> -CS/vdW    |
| Cl-H- $\pi$ ( $C_{6v}$ : ID <sub>Cor</sub> ) <sup>h</sup>     | 0.0094                                    | 0.0039                                    | 0.0013                      | 0.0041        | 72.0              | 76.0                        | 73.7                | 51.8                                | <i>p</i> -CS/vdW    |
| Br-H- $\pi$ ( $C_{6v}$ : ID <sub>Cor</sub> ) <sup>h</sup>     | 0.0100                                    | 0.0041                                    | 0.0013                      | 0.0043        | 72.7              | 56.8                        | 75.2                | 55.8                                | <i>p</i> -CS/vdW    |
| I-H- $\pi$ ( $C_{6v}$ : ID <sub>Cor</sub> ) <sup>h</sup>      | 0.0108                                    | 0.0044                                    | 0.0013                      | 0.0046        | 73.7              | 49.7                        | 77.6                | 61.2                                | <i>p</i> -CS/vdW    |
| F-F- $\pi$ ( $C_{6v}$ : ID <sub>Cor</sub> ) <sup>h</sup>      | 0.0063                                    | 0.0034                                    | 0.0012                      | 0.0036        | 71.3              | 67.6                        | 74.9                | 11.6                                | <i>p</i> -CS/vdW    |
| Cl-Cl- $\pi$ ( $C_{6v}$ : ID <sub>Cor</sub> ) <sup>h</sup>    | 0.0086                                    | 0.0041                                    | 0.0016                      | 0.0044        | 69.0              | 67.9                        | 76.5                | 73.2                                | <i>p</i> -CS/vdW    |
| Br-Br- $\pi$ ( $C_{6v}$ : ID <sub>Cor</sub> ) <sup>h</sup>    | 0.0089                                    | 0.0039                                    | 0.0014                      | 0.0041        | 70.4              | 52.4                        | 78.8                | 86.4                                | <i>p</i> -CS/vdW    |
| I-I- $\pi$ ( $C_{6v}$ : ID <sub>Cor</sub> ) <sup>h</sup>      | 0.0101                                    | 0.0038                                    | 0.0011                      | 0.0039        | 74.2              | 48.5                        | 85.4                | 122.3                               | <i>p</i> -CS/vdW    |
| F-Cl- $\pi$ ( $C_{6v}$ : ID <sub>Cor</sub> ) <sup>h</sup>     | 0.0079                                    | 0.0037                                    | 0.0014                      | 0.0039        | 69.1              | 71.3                        | 75.8                | 72.3                                | <i>p</i> -CS/vdW    |
| F-Br- $\pi$ ( $C_{6v}$ : ID <sub>Cor</sub> ) <sup>h</sup>     | 0.0086                                    | 0.0037                                    | 0.0013                      | 0.0039        | 70.8              | 60.1                        | 78.8                | 87.3                                | <i>p</i> -CS/vdW    |
| F-I- $\pi$ ( $C_{6v}$ : ID <sub>Cor</sub> ) <sup>h</sup>      | 0.0101                                    | 0.0038                                    | 0.0010                      | 0.0039        | 75.1              | 57.7                        | 86.8                | 130.2                               | <i>p</i> -CS/vdW    |

<sup>a</sup> See text for BSS-A. <sup>b</sup> Data are given at BCP, which is shown by A- $\pi$ , where one side interaction is shown if two are identical due to the symmetry. <sup>c</sup>  $c\nabla^2\rho_b(\mathbf{r}_c) = H_b(\mathbf{r}_c) - V_b(\mathbf{r}_c)/2$ , where  $c = \hbar^2/8m$ . <sup>d</sup>  $R = (x^2 + y^2)^{1/2}$ , where  $(x, y) = (H_b(\mathbf{r}_c) - V_b(\mathbf{r}_c)/2, H_b(\mathbf{r}_c))$ . <sup>e</sup>  $\theta = 90^\circ - \tan^{-1}(y/x)$ , where  $(x, y) = (H_b(\mathbf{r}_c) - V_b(\mathbf{r}_c)/2, H_b(\mathbf{r}_c))$ . <sup>f</sup>  $\theta_p = 90^\circ - \tan^{-1}(dy/dx)$ . <sup>g</sup>  $\kappa_p = |d^2y/dx^2|/[1 + (dy/dx)^2]^{3/2}$ . <sup>h</sup> Two imaginary frequencies being predicted for each.

**Table S11.** QTAIM functions and QTAIM-DFA parameters for X-H- $\pi$ (C<sub>6</sub>H<sub>6</sub>) and Y-X- $\pi$ (C<sub>6</sub>H<sub>6</sub>) (X, Y = F, Cl, Br and I) ( $C_{6v}$ : ID<sub>Bzn</sub> and ID<sub>Bzn</sub>), evaluated with MP2/BSS-A<sup>a,b</sup>

| Y-X- $\pi$ (C <sub>20</sub> H <sub>10</sub> )<br>(symm: type) | $\rho_b(\mathbf{r}_c)$<br>( $ea_0^{-3}$ ) | $c\nabla^2\rho_b(\mathbf{r}_c)^c$<br>(au) | $H_b(\mathbf{r}_c)$<br>(au) | $R^d$<br>(au) | $\theta^e$<br>(°) | freq<br>(cm <sup>-1</sup> ) | $\theta_p^f$<br>(°) | $\kappa_p^g$<br>(au <sup>-1</sup> ) | predicted<br>nature |
|---------------------------------------------------------------|-------------------------------------------|-------------------------------------------|-----------------------------|---------------|-------------------|-----------------------------|---------------------|-------------------------------------|---------------------|
| F-H- $\pi$ ( $C_{6v}$ : ID <sub>Bzn</sub> ) <sup>h</sup>      | 0.0076                                    | 0.0036                                    | 0.0015                      | 0.0039        | 67.4              | 110.2                       | 69.5                | 61.4                                | <i>p</i> -CS/vdW    |
| Cl-H- $\pi$ ( $C_{6v}$ : ID <sub>Bzn</sub> ) <sup>h</sup>     | 0.0087                                    | 0.0036                                    | 0.0012                      | 0.0038        | 72.2              | 93.9                        | 72.1                | 38.0                                | <i>p</i> -CS/vdW    |
| Br-H- $\pi$ ( $C_{6v}$ : ID <sub>Bzn</sub> ) <sup>h</sup>     | 0.0088                                    | 0.0036                                    | 0.0011                      | 0.0038        | 72.8              | 73.9                        | 72.7                | 35.2                                | <i>p</i> -CS/vdW    |
| I-H- $\pi$ ( $C_{6v}$ : ID <sub>Bzn</sub> ) <sup>h</sup>      | 0.0090                                    | 0.0036                                    | 0.0011                      | 0.0038        | 73.5              | 66.1                        | 74.1                | 33.0                                | <i>p</i> -CS/vdW    |
| F-F- $\pi$ ( $C_{6v}$ : ID <sub>Bzn</sub> ) <sup>h</sup>      | 0.0049                                    | 0.0026                                    | 0.0008                      | 0.0027        | 71.9              | 67.7                        | 75.4                | 8.4                                 | <i>p</i> -CS/vdW    |
| Cl-Cl- $\pi$ ( $C_{6v}$ : ID <sub>Bzn</sub> ) <sup>h</sup>    | 0.0065                                    | 0.0030                                    | 0.0012                      | 0.0033        | 68.0              | 79.4                        | 72.1                | 54.8                                | <i>p</i> -CS/vdW    |
| Br-Br- $\pi$ ( $C_{6v}$ : ID <sub>Bzn</sub> ) <sup>h</sup>    | 0.0065                                    | 0.0028                                    | 0.0011                      | 0.0030        | 68.9              | 67.2                        | 73.5                | 63.8                                | <i>p</i> -CS/vdW    |
| I-I- $\pi$ ( $C_{6v}$ : ID <sub>Bzn</sub> ) <sup>h</sup>      | 0.0070                                    | 0.0026                                    | 0.0008                      | 0.0027        | 72.2              | 64.5                        | 77.8                | 76.0                                | <i>p</i> -CS/vdW    |
| F-Cl- $\pi$ ( $C_{6v}$ : ID <sub>Bzn</sub> ) <sup>h</sup>     | 0.0062                                    | 0.0028                                    | 0.0011                      | 0.0031        | 68.4              | 84.1                        | 72.2                | 52.4                                | <i>p</i> -CS/vdW    |
| F-Br- $\pi$ ( $C_{6v}$ : ID <sub>Bzn</sub> ) <sup>h</sup>     | 0.0064                                    | 0.0027                                    | 0.0010                      | 0.0029        | 69.6              | 75.2                        | 74.1                | 63.4                                | <i>p</i> -CS/vdW    |
| F-I- $\pi$ ( $C_{6v}$ : ID <sub>Bzn</sub> ) <sup>h</sup>      | 0.0072                                    | 0.0027                                    | 0.0008                      | 0.0028        | 73.0              | 74.3                        | 79.2                | 82.0                                | <i>p</i> -CS/vdW    |

<sup>a</sup> See text for BSS-A. <sup>b</sup> Data are given at BCP, which is shown by A- $\pi$ , where one side interaction is shown if two are identical due to the symmetry. <sup>c</sup>  $c\nabla^2\rho_b(\mathbf{r}_c) = H_b(\mathbf{r}_c) - V_b(\mathbf{r}_c)/2$ , where  $c = \hbar^2/8m$ . <sup>d</sup>  $R = (x^2 + y^2)^{1/2}$ , where  $(x, y) = (H_b(\mathbf{r}_c) - V_b(\mathbf{r}_c)/2, H_b(\mathbf{r}_c))$ . <sup>e</sup>  $\theta = 90^\circ - \tan^{-1}(y/x)$ , where  $(x, y) = (H_b(\mathbf{r}_c) - V_b(\mathbf{r}_c)/2, H_b(\mathbf{r}_c))$ . <sup>f</sup>  $\theta_p = 90^\circ - \tan^{-1}(dy/dx)$ . <sup>g</sup>  $\kappa_p = |d^2y/dx^2|/[1 + (dy/dx)^2]^{3/2}$ . <sup>h</sup> Two imaginary frequencies being predicted for each.

**Table S12.**  $\Delta E_{\text{ES}}$  for X–H–\*– $\pi$  and Y–X–\*– $\pi$  adducts with  $\pi(\text{C}_{20}\text{H}_{10})$ ,  $\pi(\text{C}_{24}\text{H}_{12})$  and  $\pi(\text{C}_6\text{H}_6)$  (X, Y = F, Cl, Br and I) (type ID), evaluated with MP2/BSS-A, together with those differences  $\Delta\Delta E_{\text{ES}}^a$

| species                     | $\Delta E_{\text{ES:Cor}^a}^b$<br>(kJ mol <sup>−1</sup> ) | $\Delta\Delta E_{\text{ES:Cor}^a}^c$<br>(kJ mol <sup>−1</sup> ) | $\Delta E_{\text{ES:Cor}^b}$<br>(kJ mol <sup>−1</sup> ) | $\Delta\Delta E_{\text{ES:Cor}^c}$<br>(kJ mol <sup>−1</sup> ) | $\Delta E_{\text{ES:Bzn}^b}$<br>(kJ mol <sup>−1</sup> ) |
|-----------------------------|-----------------------------------------------------------|-----------------------------------------------------------------|---------------------------------------------------------|---------------------------------------------------------------|---------------------------------------------------------|
| Convex side                 |                                                           |                                                                 |                                                         |                                                               |                                                         |
| F–H–*– $\pi(\text{aC})^d$   | -20.3                                                     | 3.5                                                             | -19.7                                                   | 4.1                                                           | -23.7                                                   |
| Cl–H–*– $\pi(\text{aC})^d$  | -24.4                                                     | 0.3                                                             | -27.1                                                   | -2.4                                                          | -24.7                                                   |
| Br–H–*– $\pi(\text{aC})^d$  | -25.8                                                     | -1.2                                                            | -29.5                                                   | -4.9                                                          | -24.6                                                   |
| I–H–*– $\pi(\text{aC})^d$   | -27.0                                                     | -4.0                                                            | -31.9                                                   | -9.0                                                          | -23.0                                                   |
| F–F–*– $\pi(\text{aC})^d$   | -14.6                                                     | -4.1                                                            | -15.6                                                   | -5.1                                                          | -10.5                                                   |
| Cl–Cl–*– $\pi(\text{aC})^d$ | -30.5                                                     | -8.7                                                            | -34.6                                                   | -12.8                                                         | -21.8                                                   |
| Br–Br–*– $\pi(\text{aC})^d$ | -33.8                                                     | -9.8                                                            | -39.1                                                   | -15.2                                                         | -23.9                                                   |
| I–I–*– $\pi(\text{aC})^d$   | -40.6                                                     | -15.0                                                           | -46.8                                                   | -21.2                                                         | -25.6                                                   |
| F–Cl–*– $\pi(\text{aC})^d$  | -27.9                                                     | -6.0                                                            | -30.6                                                   | -8.7                                                          | -21.9                                                   |
| F–Br–*– $\pi(\text{aC})^d$  | -33.4                                                     | -8.0                                                            | -36.7                                                   | -11.3                                                         | -25.4                                                   |
| F–I–*– $\pi(\text{aC})^d$   | -62.8                                                     | -33.9                                                           | -46.1                                                   | -17.2                                                         | -29.0                                                   |
| Concave side                |                                                           |                                                                 |                                                         |                                                               |                                                         |
| F–H–*– $\pi(\text{aC})^d$   | -26.8                                                     | -3.1                                                            |                                                         |                                                               |                                                         |
| Cl–H–*– $\pi(\text{aC})^d$  | -42.1                                                     | -17.3                                                           |                                                         |                                                               |                                                         |
| Br–H–*– $\pi(\text{aC})^d$  | -46.0                                                     | -21.4                                                           |                                                         |                                                               |                                                         |
| I–H–*– $\pi(\text{aC})^d$   | -8.4                                                      | 14.6                                                            |                                                         |                                                               |                                                         |
| F–F–*– $\pi(\text{aC})^d$   | -25.3                                                     | -14.8                                                           |                                                         |                                                               |                                                         |
| Cl–Cl–*– $\pi(\text{aC})^d$ | -54.9                                                     | -33.1                                                           |                                                         |                                                               |                                                         |
| Br–Br–*– $\pi(\text{aC})^d$ | -59.1                                                     | -35.2                                                           |                                                         |                                                               |                                                         |
| I–I–*– $\pi(\text{aC})^d$   | -66.3                                                     | -40.7                                                           |                                                         |                                                               |                                                         |
| F–Cl–*– $\pi(\text{aC})^d$  | -47.8                                                     | -25.9                                                           |                                                         |                                                               |                                                         |
| F–Br–*– $\pi(\text{aC})^d$  | -54.4                                                     | -28.9                                                           |                                                         |                                                               |                                                         |
| F–I–*– $\pi(\text{aC})^d$   | -43.1                                                     | -14.1                                                           |                                                         |                                                               |                                                         |

<sup>a</sup> See text for BSS-A. <sup>b</sup>  $\Delta E_{\text{ES}} = E_{\text{ES}}(\text{X–H–*–}\pi(\text{C}_{20}\text{H}_{10}/\text{C}_{24}\text{H}_{12}/\text{C}_6\text{H}_6)/\text{Y–X–*–}\pi(\text{C}_{20}\text{H}_{10}/\text{C}_{24}\text{H}_{12}/\text{C}_6\text{H}_6)) - (E_{\text{ES}}(\text{X–H}/\text{Y–X}) + E(\text{C}_{20}\text{H}_{10}/\text{C}_{24}\text{H}_{12}/\text{C}_6\text{H}_6))$ . <sup>c</sup>  $\Delta\Delta E_{\text{ES}} = \Delta E_{\text{ES}}(\text{X–H–*–}\pi(\text{C}_{20}\text{H}_{10}/\text{C}_{24}\text{H}_{12})/\text{Y–X–*–}\pi(\text{C}_{20}\text{H}_{10}/\text{C}_{24}\text{H}_{12})) - \Delta E_{\text{ES}}(\text{X–H–*–}\pi(\text{C}_6\text{H}_6)/\text{Y–X–*–}\pi(\text{C}_6\text{H}_6))$ . <sup>d</sup> Two imaginary frequencies being predicted for each.

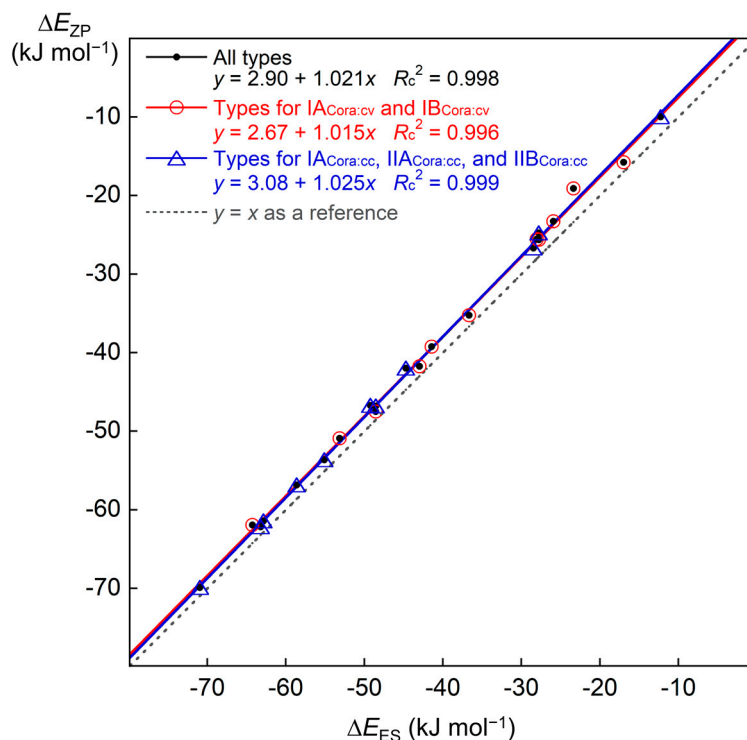

**Figure S3.** Plots of  $\Delta E_{ZP}$  versus  $\Delta E_{ES}$  for the optimized structures of B-A-\*- $\pi$ (C<sub>20</sub>H<sub>10</sub>), evaluated with MP2/BSS-A.

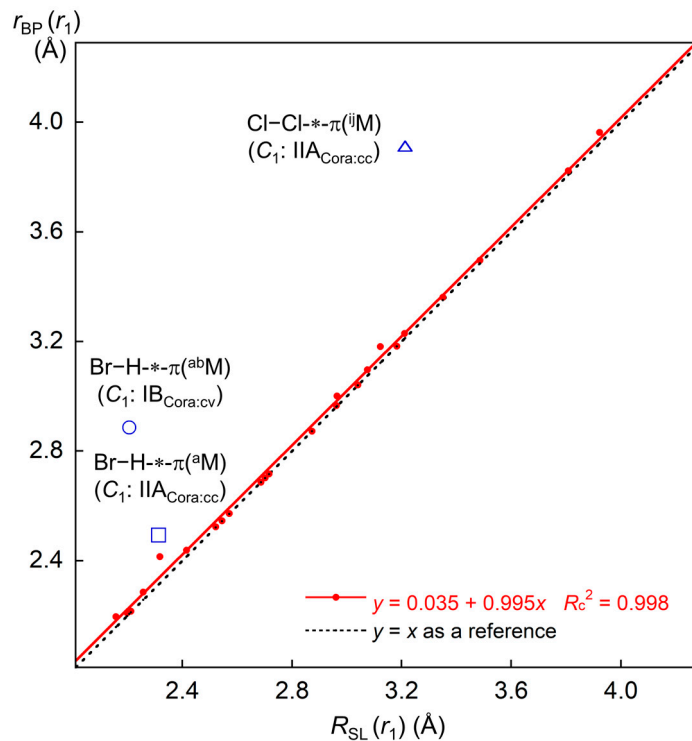

**Figure S4.** Plot of  $r_{BP}(r_1)$  versus  $R_{SL}(r_1)$  for the optimized structures of B-A-\*- $\pi$ (C<sub>20</sub>H<sub>10</sub>) with MP2/BSS-A. See Scheme 1 in the text. Br-H-\*- $\pi$ (<sup>ab</sup>M) (C<sub>1</sub>: IBCora:cv), Br-H-\*- $\pi$ (<sup>a</sup>C) (C<sub>1</sub>: IIAcora:cc) and Cl-Cl-\*- $\pi$ (<sup>ij</sup>M) (C<sub>1</sub>: IIAcora:cc) are omitted.

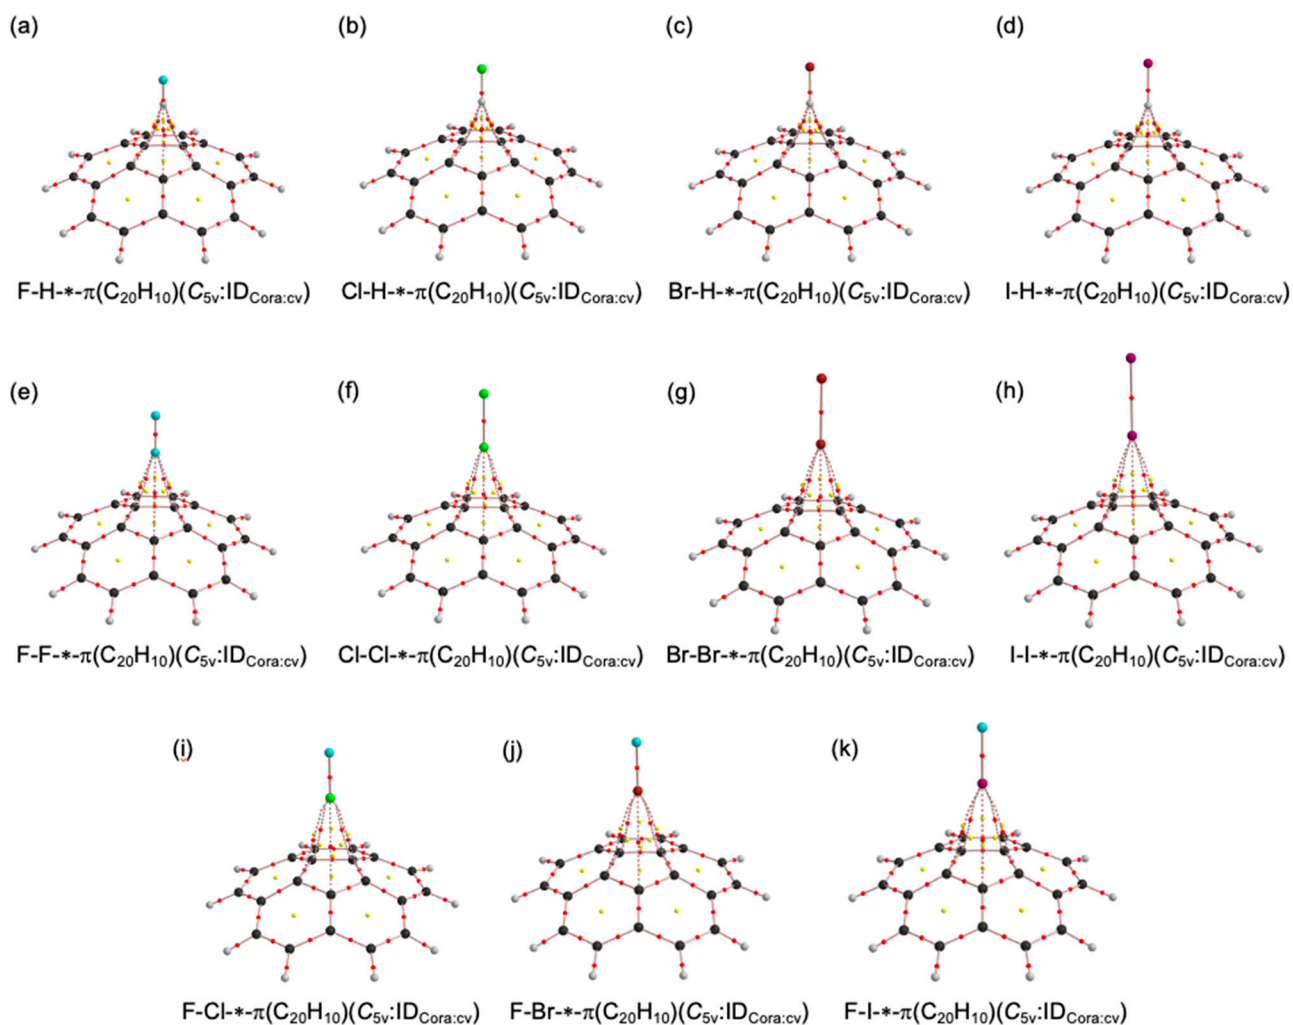

**Figure S5.** Molecular graphs for  $\text{X-H} \cdots \pi(\text{C}_{20}\text{H}_{10})$ ,  $\text{X-X} \cdots \pi(\text{C}_{20}\text{H}_{10})$  and  $\text{F-X} \cdots \pi(\text{C}_{20}\text{H}_{10})$  at convex (cv) side, evaluated with BSS-A:  $\text{F-H} \cdots \pi(\text{C}_{20}\text{H}_{10})$  ( $\text{C}_{5v}$ : type  $\text{ID}_{\text{Cora:cv}}$ ) (a),  $\text{Cl-H} \cdots \pi(\text{C}_{20}\text{H}_{10})$  ( $\text{C}_{5v}$ : type  $\text{ID}_{\text{Cora:cv}}$ ) (b),  $\text{Br-H} \cdots \pi(\text{C}_{20}\text{H}_{10})$  ( $\text{C}_{5v}$ : type  $\text{ID}_{\text{Cora:cv}}$ ) (c),  $\text{I-H} \cdots \pi(\text{C}_{20}\text{H}_{10})$  ( $\text{C}_{5v}$ : type  $\text{ID}_{\text{Cora:cv}}$ ) (d),  $\text{F-F} \cdots \pi(\text{C}_{20}\text{H}_{10})$  ( $\text{C}_{5v}$ : type  $\text{ID}_{\text{Cora:cv}}$ ) (e),  $\text{Cl-Cl} \cdots \pi(\text{C}_{20}\text{H}_{10})$  ( $\text{C}_{5v}$ : type  $\text{ID}_{\text{Cora:cv}}$ ) (f),  $\text{Br-Br} \cdots \pi(\text{C}_{20}\text{H}_{10})$  ( $\text{C}_{5v}$ : type  $\text{ID}_{\text{Cora:cv}}$ ) (g),  $\text{I-I} \cdots \pi(\text{C}_{20}\text{H}_{10})$  ( $\text{C}_{5v}$ : type  $\text{ID}_{\text{Cora:cv}}$ ) (h),  $\text{F-Cl} \cdots \pi(\text{C}_{20}\text{H}_{10})$  ( $\text{C}_{5v}$ : type  $\text{ID}_{\text{Cora:cv}}$ ) (i),  $\text{F-Br} \cdots \pi(\text{C}_{20}\text{H}_{10})$  ( $\text{C}_{5v}$ : type  $\text{ID}_{\text{Cora:cv}}$ ) (j) and  $\text{F-I} \cdots \pi(\text{C}_{20}\text{H}_{10})$  ( $\text{C}_{5v}$ : type  $\text{ID}_{\text{Cora:cv}}$ ) (k). BPs are drawn as pink lines, BCPs as red dots, RCPs (ring critical points) as yellow dots and CCPs (cage critical points) as green dots. Carbon atoms are indicated in black and hydrogen atoms are in grey, with fluorine, chlorine, bromine and iodine atoms in dark yellow, green, dark brown and dark purple, respectively.

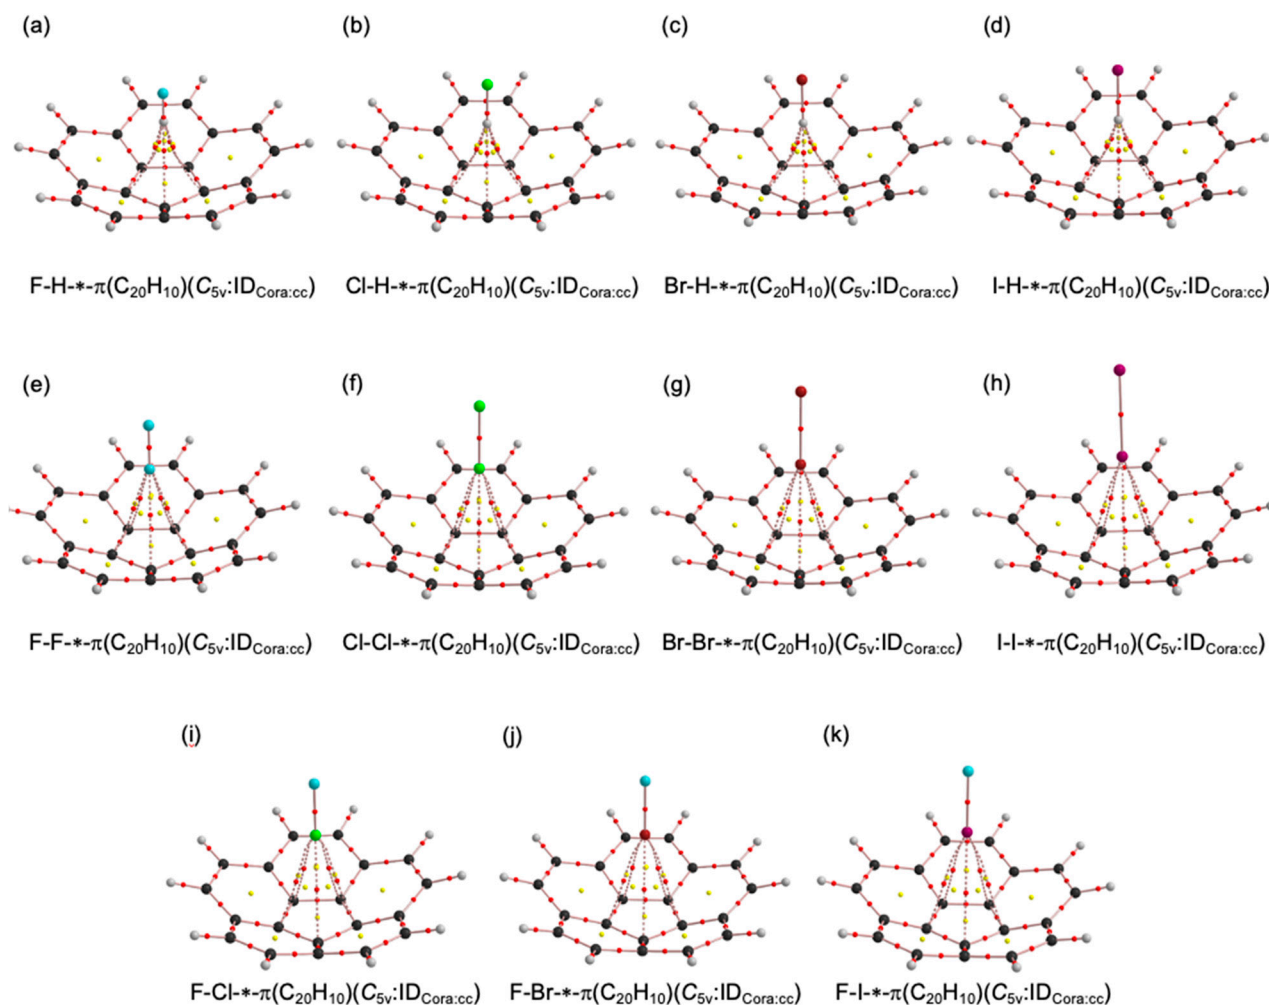

**Figure S6.** Molecular graphs for  $\text{X-H}-\pi(\text{C}_{20}\text{H}_{10})$ ,  $\text{X-X}-\pi(\text{C}_{20}\text{H}_{10})$  and  $\text{F-X}-\pi(\text{C}_{20}\text{H}_{10})$  at concave (cc) side, evaluated with BSS-A:  $\text{F-H}-\pi(\text{C}_{20}\text{H}_{10})$  ( $\text{C}_{5v}$ : type  $\text{ID}_{\text{Cora:cc}}$ ) (a),  $\text{Cl-H}-\pi(\text{C}_{20}\text{H}_{10})$  ( $\text{C}_{5v}$ : type  $\text{ID}_{\text{Cora:cc}}$ ) (b),  $\text{Br-H}-\pi(\text{C}_{20}\text{H}_{10})$  ( $\text{C}_{5v}$ : type  $\text{ID}_{\text{Cora:cc}}$ ) (c),  $\text{I-H}-\pi(\text{C}_{20}\text{H}_{10})$  ( $\text{C}_{5v}$ : type  $\text{ID}_{\text{Cora:cc}}$ ) (d),  $\text{F-F}-\pi(\text{C}_{20}\text{H}_{10})$  ( $\text{C}_{5v}$ : type  $\text{ID}_{\text{Cora:cc}}$ ) (e),  $\text{Cl-Cl}-\pi(\text{C}_{20}\text{H}_{10})$  ( $\text{C}_{5v}$ : type  $\text{ID}_{\text{Cora:cc}}$ ) (f),  $\text{Br-Br}-\pi(\text{C}_{20}\text{H}_{10})$  ( $\text{C}_{5v}$ : type  $\text{ID}_{\text{Cora:cc}}$ ) (g),  $\text{I-I}-\pi(\text{C}_{20}\text{H}_{10})$  ( $\text{C}_{5v}$ : type  $\text{ID}_{\text{Cora:cc}}$ ) (h),  $\text{F-Cl}-\pi(\text{C}_{20}\text{H}_{10})$  ( $\text{C}_{5v}$ : type  $\text{ID}_{\text{Cora:cc}}$ ) (i),  $\text{F-Br}-\pi(\text{C}_{20}\text{H}_{10})$  ( $\text{C}_{5v}$ : type  $\text{ID}_{\text{Cora:cc}}$ ) (j) and  $\text{F-I}-\pi(\text{C}_{20}\text{H}_{10})$  ( $\text{C}_{5v}$ : type  $\text{ID}_{\text{Cora:cc}}$ ) (k). BPs are drawn as pink lines, BCPs as red dots, RCPs (ring critical points) as yellow dots and CCPs (cage critical points) as green dots. Carbon atoms are indicated in black and hydrogen atoms are in grey, with fluorine, chlorine, bromine and iodine atoms in dark yellow, green, dark brown and dark purple, respectively.

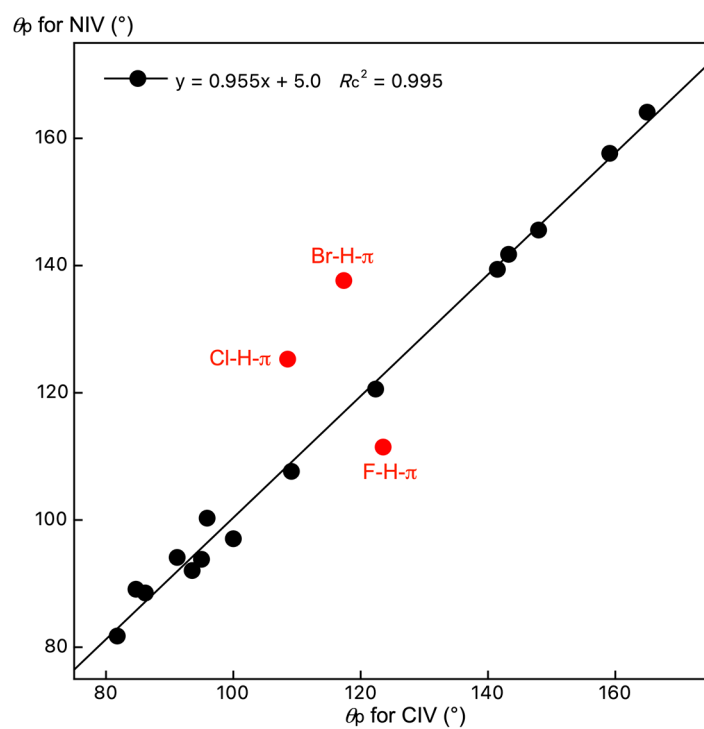

**Figure S7.** Plot of  $\theta_p$  for NIV versus  $\theta_p$  for CIV for the optimized structures of B-A- $\pi$ (C<sub>20</sub>H<sub>10</sub>) with MP2/BSS-A. F-H- $\pi$ (<sup>a</sup>C) (C<sub>1</sub>: IACora:cv), Cl-H- $\pi$ (<sup>a</sup>C) (C<sub>s</sub>: IIACorac:cc), and Br-H- $\pi$ (<sup>a</sup>C) (C<sub>1</sub>: IIACorac:cc) are omitted.

### Optimized structures given by Cartesian coordinates

Optimized structures given by Cartesian coordinates for examined molecules, together with the total energies calculated with the MP2/BSS-A method of the Gaussian 09 program package. The BSS-A is 6-311G(2d,p) basis sets applied to C and H, together with the basis set of 6-311+G(3df) for F, Cl, and Br and the (7433211/743111/7411/2 + 1s1p) type for I, implemented from the Sapporo Basis Set Factory. The optimized structures were confirmed by the frequency analysis. All structures have all positive frequencies, except for C<sub>20</sub>H<sub>10</sub> (type ID<sub>Cora:cv</sub> and type ID<sub>Cora:cc</sub>), C<sub>24</sub>H<sub>12</sub> (type ID<sub>Cor</sub>) and C<sub>6</sub>H<sub>6</sub> (type ID<sub>Bzn</sub>), which have two imaginary ones. C<sub>12</sub>H<sub>24</sub> was optimized by the C<sub>i</sub> symmetry reduced from D<sub>6h</sub>, since imaginary frequencies were detected for full planer structures calculated with MP2 level of theory.

MP2/BSS-A

Adduct C<sub>20</sub>H<sub>10</sub>

Symmetry C<sub>5v</sub>

Energy MP2 = -766.192999 au

Standard Orientation

|   |   |           |           |           |
|---|---|-----------|-----------|-----------|
| 6 | 0 | 0.000000  | 1.201919  | 0.644592  |
| 6 | 0 | -1.143093 | 0.371413  | 0.644592  |
| 6 | 0 | 1.143093  | 0.371413  | 0.644592  |
| 6 | 0 | -0.706470 | -0.972373 | 0.644592  |
| 6 | 0 | 0.706470  | -0.972373 | 0.644592  |
| 6 | 0 | 0.000000  | 2.479265  | 0.098113  |
| 6 | 0 | -2.357921 | 0.766135  | 0.098113  |
| 6 | 0 | 2.357921  | 0.766135  | 0.098113  |
| 6 | 0 | -1.457275 | -2.005768 | 0.098113  |
| 6 | 0 | 1.457275  | -2.005768 | 0.098113  |
| 6 | 0 | 1.301667  | 2.977158  | -0.264348 |
| 6 | 0 | -3.233683 | -0.317966 | -0.264348 |
| 6 | 0 | 2.429209  | 2.157951  | -0.264348 |
| 6 | 0 | -2.803000 | -1.643471 | -0.264348 |
| 6 | 0 | 3.233683  | -0.317966 | -0.264348 |
| 6 | 0 | -0.696859 | -3.173672 | -0.264348 |
| 6 | 0 | 2.803000  | -1.643471 | -0.264348 |
| 6 | 0 | 0.696859  | -3.173672 | -0.264348 |
| 6 | 0 | -1.301667 | 2.977158  | -0.264348 |
| 6 | 0 | -2.429209 | 2.157951  | -0.264348 |
| 1 | 0 | 1.403035  | 3.992174  | -0.642028 |
| 1 | 0 | 3.363222  | 2.568015  | -0.642028 |
| 1 | 0 | 4.230345  | -0.100715 | -0.642028 |
| 1 | 0 | 3.481620  | -2.405054 | -0.642028 |
| 1 | 0 | 1.211462  | -4.054420 | -0.642028 |
| 1 | 0 | -1.211462 | -4.054420 | -0.642028 |
| 1 | 0 | -3.481620 | -2.405054 | -0.642028 |
| 1 | 0 | -4.230345 | -0.100715 | -0.642028 |
| 1 | 0 | -3.363222 | 2.568015  | -0.642028 |
| 1 | 0 | -1.403035 | 3.992174  | -0.642028 |

MP2/BSS-A

Adduct C<sub>20</sub>H<sub>10</sub>-HF (type: IA<sub>Cora:cv</sub>)

Symmetry C<sub>1</sub>



|                      |                      |           |           |           |
|----------------------|----------------------|-----------|-----------|-----------|
| Energy               | MP2 = -866.528641 au |           |           |           |
| Standard Orientation |                      |           |           |           |
| 6                    | 0                    | 0.663116  | 0.923137  | 0.301280  |
| 6                    | 0                    | 1.001877  | -0.450045 | 0.246636  |
| 6                    | 0                    | -0.181799 | -1.199422 | 0.437506  |
| 6                    | 0                    | -1.249328 | -0.291362 | 0.604877  |
| 6                    | 0                    | -0.727854 | 1.018681  | 0.523471  |
| 6                    | 0                    | 1.391589  | 1.902084  | -0.363980 |
| 6                    | 0                    | 2.637530  | 1.446785  | -0.921996 |
| 6                    | 0                    | 2.972850  | 0.094037  | -0.975051 |
| 1                    | 0                    | 3.303672  | 2.159846  | -1.402135 |
| 1                    | 0                    | 3.885853  | -0.189856 | -1.493023 |
| 6                    | 0                    | 2.091496  | -0.927998 | -0.475670 |
| 6                    | 0                    | 2.010505  | -2.321789 | -0.825226 |
| 6                    | 0                    | 0.841649  | -3.059279 | -0.641869 |
| 1                    | 0                    | 2.845423  | -2.797665 | -1.334182 |
| 1                    | 0                    | 0.814477  | -4.079435 | -1.018083 |
| 6                    | 0                    | -0.352105 | -2.473428 | -0.089318 |
| 6                    | 0                    | -1.724897 | -2.880655 | -0.240179 |
| 6                    | 0                    | -2.779815 | -1.984801 | -0.074108 |
| 1                    | 0                    | -1.952695 | -3.886144 | -0.586390 |
| 1                    | 0                    | -3.786815 | -2.329388 | -0.298136 |
| 6                    | 0                    | -2.559061 | -0.601237 | 0.258054  |
| 6                    | 0                    | -3.403130 | 0.540677  | 0.023084  |
| 6                    | 0                    | -2.887829 | 1.833789  | -0.057596 |
| 1                    | 0                    | -4.458354 | 0.393196  | -0.195306 |
| 1                    | 0                    | -3.562846 | 2.639986  | -0.335624 |
| 6                    | 0                    | -1.481423 | 2.102307  | 0.089316  |
| 6                    | 0                    | -0.707462 | 3.215026  | -0.397564 |
| 6                    | 0                    | 0.666221  | 3.120453  | -0.613637 |
| 1                    | 0                    | -1.212918 | 4.129894  | -0.698396 |
| 1                    | 0                    | 1.175262  | 3.965023  | -1.072130 |
| 1                    | 0                    | 2.094771  | -0.084555 | 2.070828  |
| 9                    | 0                    | 2.613488  | 0.004150  | 2.834933  |

MP2/BSS-A  
Adduct C<sub>20</sub>H<sub>10</sub>-HCl (type: IB<sub>Cora:cv</sub>)  
Symmetry C<sub>s</sub>  
Energy MP2 = -1226.500001 au  
Standard Orientation

|   |   |           |           |           |
|---|---|-----------|-----------|-----------|
| 6 | 0 | -0.009076 | -0.659803 | 0.706002  |
| 6 | 0 | -0.009076 | -0.659803 | -0.706002 |
| 6 | 0 | -0.431340 | 0.618593  | -1.142458 |
| 6 | 0 | -0.687025 | 1.405652  | 0.000000  |
| 6 | 0 | -0.431340 | 0.618593  | 1.142458  |
| 6 | 0 | 0.827598  | -1.479196 | 1.455954  |
| 6 | 0 | 1.523330  | -2.481459 | 0.693015  |
| 6 | 0 | 1.523330  | -2.481459 | -0.693015 |
| 1 | 0 | 2.144435  | -3.212590 | 1.205221  |
| 1 | 0 | 2.144435  | -3.212590 | -1.205221 |
| 6 | 0 | 0.827598  | -1.479196 | -1.455954 |
| 6 | 0 | 1.052918  | -1.018546 | -2.807996 |

|    |   |           |           |           |
|----|---|-----------|-----------|-----------|
| 6  | 0 | 0.642716  | 0.243650  | -3.234855 |
| 1  | 0 | 1.641923  | -1.627048 | -3.490264 |
| 1  | 0 | 0.931539  | 0.567134  | -4.232339 |
| 6  | 0 | -0.034761 | 1.163187  | -2.357479 |
| 6  | 0 | -0.120428 | 2.598647  | -2.426730 |
| 6  | 0 | -0.373130 | 3.376303  | -1.297490 |
| 1  | 0 | 0.111884  | 3.106806  | -3.359858 |
| 1  | 0 | -0.327206 | 4.458359  | -1.397786 |
| 6  | 0 | -0.563514 | 2.789940  | 0.000000  |
| 6  | 0 | -0.373130 | 3.376303  | 1.297490  |
| 6  | 0 | -0.120428 | 2.598647  | 2.426730  |
| 1  | 0 | -0.327206 | 4.458359  | 1.397786  |
| 1  | 0 | 0.111884  | 3.106806  | 3.359858  |
| 6  | 0 | -0.034761 | 1.163187  | 2.357479  |
| 6  | 0 | 0.642716  | 0.243650  | 3.234855  |
| 6  | 0 | 1.052918  | -1.018546 | 2.807996  |
| 1  | 0 | 0.931539  | 0.567134  | 4.232339  |
| 1  | 0 | 1.641923  | -1.627048 | 3.490264  |
| 1  | 0 | -1.462254 | -2.327239 | 0.000000  |
| 17 | 0 | -2.174917 | -3.398127 | 0.000000  |

# MP2/BSS-A

Adduct C<sub>20</sub>H<sub>10</sub>-HBr (type: IB<sub>Cora:cv</sub>)

Symmetry C<sub>1</sub>

Energy MP2 = -3339.514026 au

Standard Orientation

|   |   |           |           |           |
|---|---|-----------|-----------|-----------|
| 6 | 0 | -0.214366 | 0.707459  | 0.286619  |
| 6 | 0 | -0.214519 | -0.707216 | 0.286702  |
| 6 | 0 | 0.957966  | -1.142975 | -0.369062 |
| 6 | 0 | 1.683749  | -0.000146 | -0.770529 |
| 6 | 0 | 0.958211  | 1.142885  | -0.369193 |
| 6 | 0 | -0.860051 | 1.459272  | 1.262036  |
| 6 | 0 | -1.714760 | 0.698139  | 2.134070  |
| 6 | 0 | -1.714907 | -0.697356 | 2.134159  |
| 1 | 0 | -2.315256 | 1.211497  | 2.881495  |
| 1 | 0 | -2.315509 | -1.210496 | 2.881648  |
| 6 | 0 | -0.860358 | -1.458776 | 1.262218  |
| 6 | 0 | -0.371234 | -2.805676 | 1.398809  |
| 6 | 0 | 0.789859  | -3.234693 | 0.757109  |
| 1 | 0 | -0.858323 | -3.487022 | 2.092525  |
| 1 | 0 | 1.160453  | -4.232760 | 0.979760  |
| 6 | 0 | 1.565880  | -2.358956 | -0.082701 |
| 6 | 0 | 2.958947  | -2.430305 | -0.439074 |
| 6 | 0 | 3.676211  | -1.302277 | -0.835348 |
| 1 | 0 | 3.500667  | -3.364133 | -0.307002 |
| 1 | 0 | 4.747178  | -1.404303 | -0.995483 |
| 6 | 0 | 3.066321  | -0.000303 | -0.911906 |
| 6 | 0 | 3.676490  | 1.301549  | -0.835500 |
| 6 | 0 | 2.959467  | 2.429779  | -0.439360 |
| 1 | 0 | 4.747479  | 1.403327  | -0.995645 |
| 1 | 0 | 3.501389  | 3.363504  | -0.307396 |
| 6 | 0 | 1.566385  | 2.358772  | -0.082980 |

|    |   |           |           |           |
|----|---|-----------|-----------|-----------|
| 6  | 0 | 0.790549  | 3.234777  | 0.756723  |
| 6  | 0 | -0.370638 | 2.806085  | 1.398469  |
| 1  | 0 | 1.161356  | 4.232791  | 0.979254  |
| 1  | 0 | -0.857584 | 3.487619  | 2.092100  |
| 1  | 0 | -2.113121 | -0.000468 | -0.836361 |
| 35 | 0 | -3.438113 | 0.000006  | -1.363213 |

MP2/BSS-A

Adduct C<sub>20</sub>H<sub>10</sub>-HI (type: IB<sub>Cora:cv</sub>)

Symmetry C<sub>s</sub>

Energy MP2 = -7684.863174 au

Standard Orientation

|    |   |           |           |           |
|----|---|-----------|-----------|-----------|
| 6  | 0 | -0.424248 | -0.223111 | 0.706002  |
| 6  | 0 | -0.424248 | -0.223111 | -0.706002 |
| 6  | 0 | 0.357686  | -1.319096 | -1.142458 |
| 6  | 0 | 0.834998  | -1.995121 | 0.000000  |
| 6  | 0 | 0.357686  | -1.319096 | 1.142458  |
| 6  | 0 | -1.466060 | 0.311730  | 1.455954  |
| 6  | 0 | -2.427413 | 1.062979  | 0.693015  |
| 6  | 0 | -2.427413 | 1.062979  | -0.693015 |
| 1  | 0 | -3.237188 | 1.577361  | 1.205221  |
| 1  | 0 | -3.237188 | 1.577361  | -1.205221 |
| 6  | 0 | -1.466060 | 0.311730  | -1.455954 |
| 6  | 0 | -1.544844 | -0.194985 | -2.807996 |
| 6  | 0 | -0.779229 | -1.279069 | -3.234855 |
| 1  | 0 | -2.287641 | 0.211776  | -3.490264 |
| 1  | 0 | -0.959291 | -1.673580 | -4.232339 |
| 6  | 0 | 0.140187  | -1.956710 | -2.357479 |
| 6  | 0 | 0.647141  | -3.302400 | -2.426730 |
| 6  | 0 | 1.118820  | -3.970327 | -1.297490 |
| 1  | 0 | 0.575750  | -3.856564 | -3.359858 |
| 1  | 0 | 1.395421  | -5.017440 | -1.397786 |
| 6  | 0 | 1.127003  | -3.353885 | 0.000000  |
| 6  | 0 | 1.118820  | -3.970327 | 1.297490  |
| 6  | 0 | 0.647141  | -3.302400 | 2.426730  |
| 1  | 0 | 1.395421  | -5.017440 | 1.397786  |
| 1  | 0 | 0.575750  | -3.856564 | 3.359858  |
| 6  | 0 | 0.140187  | -1.956710 | 2.357479  |
| 6  | 0 | -0.779229 | -1.279069 | 3.234855  |
| 6  | 0 | -1.544844 | -0.194985 | 2.807996  |
| 1  | 0 | -0.959291 | -1.673580 | 4.232339  |
| 1  | 0 | -2.287641 | 0.211776  | 3.490264  |
| 1  | 0 | 0.469904  | 1.799897  | 0.000000  |
| 53 | 0 | 0.930557  | 3.363451  | 0.000000  |

MP2/BSS-A

Adduct C<sub>20</sub>H<sub>10</sub>-F<sub>2</sub> (type: IA<sub>Cora:cv</sub>)

Symmetry C<sub>s</sub>

Energy MP2 = -965.466833 au

Standard Orientation

|   |   |           |           |          |
|---|---|-----------|-----------|----------|
| 6 | 0 | -0.146028 | -0.157223 | 1.143062 |
| 6 | 0 | 0.117781  | -0.944457 | 0.000000 |

|   |   |           |           |           |
|---|---|-----------|-----------|-----------|
| 6 | 0 | -0.146028 | -0.157223 | -1.143062 |
| 6 | 0 | -0.572791 | 1.115772  | -0.706492 |
| 6 | 0 | -0.572791 | 1.115772  | 0.706492  |
| 6 | 0 | 0.493209  | -0.361352 | 2.359088  |
| 6 | 0 | 1.273607  | -1.569645 | 2.429662  |
| 6 | 0 | 1.532741  | -2.348108 | 1.302304  |
| 1 | 0 | 1.757929  | -1.842700 | 3.364605  |
| 1 | 0 | 2.207432  | -3.194956 | 1.405756  |
| 6 | 0 | 1.037178  | -1.987767 | 0.000000  |
| 6 | 0 | 1.532741  | -2.348108 | -1.302304 |
| 6 | 0 | 1.273607  | -1.569645 | -2.429662 |
| 1 | 0 | 2.207432  | -3.194956 | -1.405756 |
| 1 | 0 | 1.757929  | -1.842700 | -3.364605 |
| 6 | 0 | 0.493209  | -0.361352 | -2.359088 |
| 6 | 0 | 0.492710  | 0.781211  | -3.235371 |
| 6 | 0 | 0.074104  | 2.039034  | -2.804132 |
| 1 | 0 | 0.917110  | 0.694274  | -4.233086 |
| 1 | 0 | 0.190072  | 2.880483  | -3.483575 |
| 6 | 0 | -0.382953 | 2.268955  | -1.458008 |
| 6 | 0 | -0.409068 | 3.491083  | -0.697068 |
| 6 | 0 | -0.409068 | 3.491083  | 0.697068  |
| 1 | 0 | -0.329631 | 4.446354  | -1.211166 |
| 1 | 0 | -0.329631 | 4.446354  | 1.211166  |
| 6 | 0 | -0.382953 | 2.268955  | 1.458008  |
| 6 | 0 | 0.074104  | 2.039034  | 2.804132  |
| 6 | 0 | 0.492710  | 0.781211  | 3.235371  |
| 1 | 0 | 0.190072  | 2.880483  | 3.483575  |
| 1 | 0 | 0.917110  | 0.694274  | 4.233086  |
| 9 | 0 | -1.896631 | -2.461204 | 0.000000  |
| 9 | 0 | -3.068030 | -3.259939 | 0.000000  |

MP2/BSS-A

Adduct C<sub>20</sub>H<sub>10</sub>-Cl<sub>2</sub> (type: IACora:cv)

Symmetry C<sub>s</sub>

Energy MP2 = -1685.565071 au

Standard Orientation

|   |   |           |           |           |
|---|---|-----------|-----------|-----------|
| 6 | 0 | -0.134609 | -0.209295 | 1.143290  |
| 6 | 0 | -0.648955 | 0.444342  | 0.000000  |
| 6 | 0 | -0.134609 | -0.209295 | -1.143290 |
| 6 | 0 | 0.699492  | -1.259329 | -0.706443 |
| 6 | 0 | 0.699492  | -1.259329 | 0.706443  |
| 6 | 0 | -0.803084 | -0.231141 | 2.360257  |
| 6 | 0 | -1.945082 | 0.643023  | 2.430712  |
| 6 | 0 | -2.455189 | 1.286245  | 1.302546  |
| 1 | 0 | -2.491080 | 0.739463  | 3.366591  |
| 1 | 0 | -3.375258 | 1.856661  | 1.407780  |
| 6 | 0 | -1.871214 | 1.111917  | 0.000000  |
| 6 | 0 | -2.455189 | 1.286245  | -1.302546 |
| 6 | 0 | -1.945082 | 0.643023  | -2.430712 |
| 1 | 0 | -3.375258 | 1.856661  | -1.407780 |
| 1 | 0 | -2.491080 | 0.739463  | -3.366591 |
| 6 | 0 | -0.803084 | -0.231141 | -2.360257 |

|    |   |           |           |           |
|----|---|-----------|-----------|-----------|
| 6  | 0 | -0.412622 | -1.304551 | -3.237226 |
| 6  | 0 | 0.408137  | -2.345440 | -2.805319 |
| 1  | 0 | -0.838827 | -1.365605 | -4.236005 |
| 1  | 0 | 0.586518  | -3.175149 | -3.485626 |
| 6  | 0 | 0.915084  | -2.407866 | -1.458671 |
| 6  | 0 | 1.354326  | -3.547712 | -0.697413 |
| 6  | 0 | 1.354326  | -3.547712 | 0.697413  |
| 1  | 0 | 1.603495  | -4.473598 | -1.210970 |
| 1  | 0 | 1.603495  | -4.473598 | 1.210970  |
| 6  | 0 | 0.915084  | -2.407866 | 1.458671  |
| 6  | 0 | 0.408137  | -2.345440 | 2.805319  |
| 6  | 0 | -0.412622 | -1.304551 | 3.237226  |
| 1  | 0 | 0.586518  | -3.175149 | 3.485626  |
| 1  | 0 | -0.838827 | -1.365605 | 4.236005  |
| 17 | 0 | 0.932985  | 2.615716  | 0.000000  |
| 17 | 0 | 2.163125  | 4.208502  | 0.000000  |

MP2/BSS-A

Adduct C<sub>20</sub>H<sub>10</sub>-Br<sub>2</sub> (type: IACora:cv)

Symmetry C<sub>s</sub>

Energy MP2 = -5911.628544 au

Standard Orientation

|   |   |           |           |           |
|---|---|-----------|-----------|-----------|
| 6 | 0 | -0.230590 | -0.956918 | 1.143734  |
| 6 | 0 | -0.883474 | -0.438937 | 0.000000  |
| 6 | 0 | -0.230590 | -0.956918 | -1.143734 |
| 6 | 0 | 0.826445  | -1.780293 | -0.706456 |
| 6 | 0 | 0.826445  | -1.780293 | 0.706456  |
| 6 | 0 | -0.875600 | -1.135776 | 2.360339  |
| 6 | 0 | -2.191367 | -0.555819 | 2.430353  |
| 6 | 0 | -2.839705 | -0.051239 | 1.302035  |
| 1 | 0 | -2.745015 | -0.591254 | 3.366064  |
| 1 | 0 | -3.868592 | 0.285175  | 1.407508  |
| 6 | 0 | -2.232080 | -0.082552 | 0.000000  |
| 6 | 0 | -2.839705 | -0.051239 | -1.302035 |
| 6 | 0 | -2.191367 | -0.555819 | -2.430353 |
| 1 | 0 | -3.868592 | 0.285175  | -1.407508 |
| 1 | 0 | -2.745015 | -0.591254 | -3.366064 |
| 6 | 0 | -0.875600 | -1.135776 | -2.360339 |
| 6 | 0 | -0.242766 | -2.086378 | -3.237724 |
| 6 | 0 | 0.800509  | -2.904016 | -2.805814 |
| 1 | 0 | -0.642284 | -2.245598 | -4.236650 |
| 1 | 0 | 1.170160  | -3.667699 | -3.486352 |
| 6 | 0 | 1.307455  | -2.845574 | -1.458940 |
| 6 | 0 | 2.002124  | -3.849597 | -0.697625 |
| 6 | 0 | 2.002124  | -3.849597 | 0.697625  |
| 1 | 0 | 2.461523  | -4.691344 | -1.210913 |
| 1 | 0 | 2.461523  | -4.691344 | 1.210913  |
| 6 | 0 | 1.307455  | -2.845574 | 1.458940  |
| 6 | 0 | 0.800509  | -2.904016 | 2.805814  |
| 6 | 0 | -0.242766 | -2.086378 | 3.237724  |
| 1 | 0 | 1.170160  | -3.667699 | 3.486352  |
| 1 | 0 | -0.642284 | -2.245598 | 4.236650  |

|    |   |          |          |          |
|----|---|----------|----------|----------|
| 35 | 0 | 0.148080 | 2.073757 | 0.000000 |
| 35 | 0 | 1.088025 | 4.181606 | 0.000000 |

MP2/BSS-A

Adduct C<sub>20</sub>H<sub>10</sub>-I<sub>2</sub> (type: IACora:cv)

Symmetry C<sub>s</sub>

Energy MP2 = -14602.365869 au

Standard Orientation

|    |   |           |           |           |
|----|---|-----------|-----------|-----------|
| 6  | 0 | -0.243202 | -1.592295 | 1.143645  |
| 6  | 0 | -0.966119 | -1.177517 | 0.000000  |
| 6  | 0 | -0.243202 | -1.592295 | -1.143645 |
| 6  | 0 | 0.923272  | -2.250892 | -0.706187 |
| 6  | 0 | 0.923272  | -2.250892 | 0.706187  |
| 6  | 0 | -0.854415 | -1.862731 | 2.360773  |
| 6  | 0 | -2.240249 | -1.480197 | 2.431290  |
| 6  | 0 | -2.956268 | -1.077181 | 1.302501  |
| 1  | 0 | -2.782387 | -1.594488 | 3.367426  |
| 1  | 0 | -4.023179 | -0.894577 | 1.408895  |
| 6  | 0 | -2.351886 | -1.021730 | 0.000000  |
| 6  | 0 | -2.956268 | -1.077181 | -1.302501 |
| 6  | 0 | -2.240249 | -1.480197 | -2.431290 |
| 1  | 0 | -4.023179 | -0.894577 | -1.408895 |
| 1  | 0 | -2.782387 | -1.594488 | -3.367426 |
| 6  | 0 | -0.854415 | -1.862731 | -2.360773 |
| 6  | 0 | -0.087212 | -2.708010 | -3.238714 |
| 6  | 0 | 1.065276  | -3.363065 | -2.806670 |
| 1  | 0 | -0.457816 | -2.923124 | -4.238297 |
| 1  | 0 | 1.544247  | -4.062619 | -3.487990 |
| 6  | 0 | 1.557403  | -3.232143 | -1.459195 |
| 6  | 0 | 2.392653  | -4.122458 | -0.697734 |
| 6  | 0 | 2.392653  | -4.122458 | 0.697734  |
| 1  | 0 | 2.971778  | -4.886868 | -1.210874 |
| 1  | 0 | 2.971778  | -4.886868 | 1.210874  |
| 6  | 0 | 1.557403  | -3.232143 | 1.459195  |
| 6  | 0 | 1.065276  | -3.363065 | 2.806670  |
| 6  | 0 | -0.087212 | -2.708010 | 3.238714  |
| 1  | 0 | 1.544247  | -4.062619 | 3.487990  |
| 1  | 0 | -0.457816 | -2.923124 | 4.238297  |
| 53 | 0 | -0.123492 | 1.569033  | 0.000000  |
| 53 | 0 | 0.703033  | 4.132599  | 0.000000  |

MP2/BSS-A

Adduct C<sub>20</sub>H<sub>10</sub>-ClF (type: IACora:cv)

Symmetry C<sub>s</sub>

Energy MP2 = -1325.546120 au

Standard Orientation

|   |   |           |           |           |
|---|---|-----------|-----------|-----------|
| 6 | 0 | -0.029431 | -0.019536 | 1.144068  |
| 6 | 0 | 0.307113  | -0.783334 | 0.000000  |
| 6 | 0 | -0.029431 | -0.019536 | -1.144068 |
| 6 | 0 | -0.586060 | 1.198436  | -0.706589 |
| 6 | 0 | -0.586060 | 1.198436  | 0.706589  |
| 6 | 0 | 0.627215  | -0.157097 | 2.359392  |

|    |   |           |           |           |
|----|---|-----------|-----------|-----------|
| 6  | 0 | 1.528847  | -1.277217 | 2.429034  |
| 6  | 0 | 1.871137  | -2.023975 | 1.301132  |
| 1  | 0 | 2.038007  | -1.499473 | 3.364249  |
| 1  | 0 | 2.630195  | -2.795717 | 1.405718  |
| 6  | 0 | 1.344234  | -1.717489 | 0.000000  |
| 6  | 0 | 1.871137  | -2.023975 | -1.301132 |
| 6  | 0 | 1.528847  | -1.277217 | -2.429034 |
| 1  | 0 | 2.630195  | -2.795717 | -1.405718 |
| 1  | 0 | 2.038007  | -1.499473 | -3.364249 |
| 6  | 0 | 0.627215  | -0.157097 | -2.359392 |
| 6  | 0 | 0.505035  | 0.978289  | -3.237078 |
| 6  | 0 | -0.044156 | 2.184459  | -2.805498 |
| 1  | 0 | 0.933971  | 0.935146  | -4.235499 |
| 1  | 0 | -0.019821 | 3.032734  | -3.485765 |
| 6  | 0 | -0.521512 | 2.365939  | -1.458849 |
| 6  | 0 | -0.674507 | 3.576837  | -0.697712 |
| 6  | 0 | -0.674507 | 3.576837  | 0.697712  |
| 1  | 0 | -0.692799 | 4.535632  | -1.210928 |
| 1  | 0 | -0.692799 | 4.535632  | 1.210928  |
| 6  | 0 | -0.521512 | 2.365939  | 1.458849  |
| 6  | 0 | -0.044156 | 2.184459  | 2.805498  |
| 6  | 0 | 0.505035  | 0.978289  | 3.237078  |
| 1  | 0 | -0.019821 | 3.032734  | 3.485765  |
| 1  | 0 | 0.933971  | 0.935146  | 4.235499  |
| 17 | 0 | -1.550150 | -2.521956 | 0.000000  |
| 9  | 0 | -2.828162 | -3.605788 | 0.000000  |

MP2/BSS-A

Adduct C<sub>20</sub>H<sub>10</sub>-BrF (type: IA<sub>Cora:cv</sub>)

Symmetry C<sub>s</sub>

Energy MP2 = -3438.587958 au

Standard Orientation

|   |   |           |           |           |
|---|---|-----------|-----------|-----------|
| 6 | 0 | 0.108280  | 0.266593  | 1.144661  |
| 6 | 0 | 0.541424  | -0.449651 | 0.000000  |
| 6 | 0 | 0.108280  | 0.266593  | -1.144661 |
| 6 | 0 | -0.606936 | 1.397060  | -0.706588 |
| 6 | 0 | -0.606936 | 1.397060  | 0.706588  |
| 6 | 0 | 0.779577  | 0.220422  | 2.358861  |
| 6 | 0 | 1.825896  | -0.765068 | 2.427911  |
| 6 | 0 | 2.266844  | -1.458991 | 1.300057  |
| 1 | 0 | 2.362358  | -0.914033 | 3.362420  |
| 1 | 0 | 3.125158  | -2.118520 | 1.404334  |
| 6 | 0 | 1.702284  | -1.229510 | 0.000000  |
| 6 | 0 | 2.266844  | -1.458991 | -1.300057 |
| 6 | 0 | 1.825896  | -0.765068 | -2.427911 |
| 1 | 0 | 3.125158  | -2.118520 | -1.404334 |
| 1 | 0 | 2.362358  | -0.914033 | -3.362420 |
| 6 | 0 | 0.779577  | 0.220422  | -2.358861 |
| 6 | 0 | 0.503986  | 1.328387  | -3.237154 |
| 6 | 0 | -0.204834 | 2.448007  | -2.805861 |
| 1 | 0 | 0.934977  | 1.343454  | -4.235419 |
| 1 | 0 | -0.296953 | 3.291458  | -3.486254 |

|    |   |           |           |           |
|----|---|-----------|-----------|-----------|
| 6  | 0 | -0.702171 | 2.562940  | -1.458991 |
| 6  | 0 | -1.016769 | 3.741265  | -0.698018 |
| 6  | 0 | -1.016769 | 3.741265  | 0.698018  |
| 1  | 0 | -1.162924 | 4.689162  | -1.210940 |
| 1  | 0 | -1.162924 | 4.689162  | 1.210940  |
| 6  | 0 | -0.702171 | 2.562940  | 1.458991  |
| 6  | 0 | -0.204834 | 2.448007  | 2.805861  |
| 6  | 0 | 0.503986  | 1.328387  | 3.237154  |
| 1  | 0 | -0.296953 | 3.291458  | 3.486254  |
| 1  | 0 | 0.934977  | 1.343454  | 4.235419  |
| 35 | 0 | -1.088436 | -2.438036 | 0.000000  |
| 9  | 0 | -2.304303 | -3.784910 | 0.000000  |

MP2/BSS-A

Adduct C<sub>20</sub>H<sub>10</sub>-IF (type: IACora:cv)

Symmetry C<sub>1</sub>

Energy MP2 = -7783.976623 au

Standard Orientation

|    |   |           |           |           |
|----|---|-----------|-----------|-----------|
| 6  | 0 | -0.538204 | -1.144696 | 0.205502  |
| 6  | 0 | 0.119699  | 0.000083  | 0.723483  |
| 6  | 0 | -0.538293 | 1.144743  | 0.205355  |
| 6  | 0 | -1.572776 | 0.706166  | -0.642020 |
| 6  | 0 | -1.572725 | -0.706308 | -0.641924 |
| 6  | 0 | -0.575023 | -2.358688 | 0.878203  |
| 6  | 0 | 0.275033  | -2.427731 | 2.036329  |
| 6  | 0 | 0.910126  | -1.299580 | 2.559162  |
| 1  | 0 | 0.356949  | -3.361985 | 2.587450  |
| 1  | 0 | 1.459482  | -1.404188 | 3.491794  |
| 6  | 0 | 0.751814  | 0.000184  | 1.971298  |
| 6  | 0 | 0.910007  | 1.300032  | 2.559011  |
| 6  | 0 | 0.274813  | 2.428065  | 2.036042  |
| 1  | 0 | 1.459351  | 1.404801  | 3.491630  |
| 1  | 0 | 0.356645  | 3.362389  | 2.587052  |
| 6  | 0 | -0.575220 | 2.358813  | 0.877911  |
| 6  | 0 | -1.639979 | 3.237731  | 0.466846  |
| 6  | 0 | -2.663651 | 2.806530  | -0.374526 |
| 1  | 0 | -1.707208 | 4.236335  | 0.891936  |
| 1  | 0 | -3.488554 | 3.487513  | -0.570963 |
| 6  | 0 | -2.717486 | 1.458963  | -0.881155 |
| 6  | 0 | -3.848050 | 0.698015  | -1.337346 |
| 6  | 0 | -3.847995 | -0.698427 | -1.337259 |
| 1  | 0 | -4.771037 | 1.210738  | -1.598335 |
| 1  | 0 | -4.770944 | -1.211255 | -1.598183 |
| 6  | 0 | -2.717374 | -1.459227 | -0.880963 |
| 6  | 0 | -2.663431 | -2.806723 | -0.374163 |
| 6  | 0 | -1.639717 | -3.237740 | 0.467255  |
| 1  | 0 | -3.488278 | -3.487801 | -0.570520 |
| 1  | 0 | -1.706860 | -4.236302 | 0.892460  |
| 53 | 0 | 2.344206  | -0.000013 | -0.810095 |
| 9  | 0 | 3.918683  | -0.000084 | -1.974614 |



|                      |                                                                    |           |           |           |
|----------------------|--------------------------------------------------------------------|-----------|-----------|-----------|
| Adduct               | C <sub>20</sub> H <sub>10</sub> -HF (type: ID <sub>Cora:cv</sub> ) |           |           |           |
| Symmetry             | C <sub>5v</sub>                                                    |           |           |           |
| Energy               | MP2 = -866.527462 au                                               |           |           |           |
| Standard Orientation |                                                                    |           |           |           |
| 6                    | 0                                                                  | 0.000000  | 1.202172  | 0.372081  |
| 6                    | 0                                                                  | -1.143333 | 0.371492  | 0.372081  |
| 6                    | 0                                                                  | 1.143333  | 0.371492  | 0.372081  |
| 6                    | 0                                                                  | -0.706619 | -0.972578 | 0.372081  |
| 6                    | 0                                                                  | 0.706619  | -0.972578 | 0.372081  |
| 6                    | 0                                                                  | 0.000000  | 2.481915  | -0.169484 |
| 6                    | 0                                                                  | -2.360441 | 0.766954  | -0.169484 |
| 6                    | 0                                                                  | 2.360441  | 0.766954  | -0.169484 |
| 6                    | 0                                                                  | -1.458833 | -2.007911 | -0.169484 |
| 6                    | 0                                                                  | 1.458833  | -2.007911 | -0.169484 |
| 6                    | 0                                                                  | -1.302188 | 2.978520  | -0.529743 |
| 6                    | 0                                                                  | -2.430343 | 2.158868  | -0.529743 |
| 1                    | 0                                                                  | -1.404881 | 3.993974  | -0.905495 |
| 1                    | 0                                                                  | -3.364363 | 2.570327  | -0.905495 |
| 6                    | 0                                                                  | 1.302188  | 2.978520  | -0.529743 |
| 6                    | 0                                                                  | 2.430343  | 2.158868  | -0.529743 |
| 1                    | 0                                                                  | 1.404881  | 3.993974  | -0.905495 |
| 1                    | 0                                                                  | 3.364363  | 2.570327  | -0.905495 |
| 6                    | 0                                                                  | -3.235139 | -0.318041 | -0.529743 |
| 6                    | 0                                                                  | -2.804222 | -1.644266 | -0.529743 |
| 1                    | 0                                                                  | -4.232627 | -0.101915 | -0.905495 |
| 1                    | 0                                                                  | -3.484172 | -2.405425 | -0.905495 |
| 6                    | 0                                                                  | 3.235139  | -0.318041 | -0.529743 |
| 6                    | 0                                                                  | 2.804222  | -1.644266 | -0.529743 |
| 1                    | 0                                                                  | 4.232627  | -0.101915 | -0.905495 |
| 1                    | 0                                                                  | 3.484172  | -2.405425 | -0.905495 |
| 6                    | 0                                                                  | -0.697238 | -3.175080 | -0.529743 |
| 1                    | 0                                                                  | -1.211026 | -4.056961 | -0.905495 |
| 6                    | 0                                                                  | 0.697238  | -3.175080 | -0.529743 |
| 1                    | 0                                                                  | 1.211026  | -4.056961 | -0.905495 |
| 1                    | 0                                                                  | 0.000000  | 0.000000  | 2.644435  |
| 9                    | 0                                                                  | 0.000000  | 0.000000  | 3.568577  |

|                      |                                                                     |           |           |           |
|----------------------|---------------------------------------------------------------------|-----------|-----------|-----------|
| Adduct               | C <sub>20</sub> H <sub>10</sub> -HCl (type: ID <sub>Cora:cv</sub> ) |           |           |           |
| Symmetry             | C <sub>5v</sub>                                                     |           |           |           |
| Energy               | MP2 = -1226.499431 au                                               |           |           |           |
| Standard Orientation |                                                                     |           |           |           |
| 6                    | 0                                                                   | 0.000000  | 1.201903  | 0.140200  |
| 6                    | 0                                                                   | -1.143078 | 0.371408  | 0.140200  |
| 6                    | 0                                                                   | 1.143078  | 0.371408  | 0.140200  |
| 6                    | 0                                                                   | -0.706461 | -0.972360 | 0.140200  |
| 6                    | 0                                                                   | 0.706461  | -0.972360 | 0.140200  |
| 6                    | 0                                                                   | 0.000000  | 2.482052  | -0.400338 |
| 6                    | 0                                                                   | -2.360572 | 0.766996  | -0.400338 |
| 6                    | 0                                                                   | 2.360572  | 0.766996  | -0.400338 |
| 6                    | 0                                                                   | -1.458914 | -2.008022 | -0.400338 |
| 6                    | 0                                                                   | 1.458914  | -2.008022 | -0.400338 |
| 6                    | 0                                                                   | -1.302445 | 2.978949  | -0.759716 |

|    |   |           |           |           |
|----|---|-----------|-----------|-----------|
| 6  | 0 | -2.430671 | 2.159245  | -0.759716 |
| 1  | 0 | -1.405458 | 3.994757  | -1.134528 |
| 1  | 0 | -3.364929 | 2.571118  | -1.134528 |
| 6  | 0 | 1.302445  | 2.978949  | -0.759716 |
| 6  | 0 | 2.430671  | 2.159245  | -0.759716 |
| 1  | 0 | 1.405458  | 3.994757  | -1.134528 |
| 1  | 0 | 3.364929  | 2.571118  | -1.134528 |
| 6  | 0 | -3.235626 | -0.318153 | -0.759716 |
| 6  | 0 | -2.804682 | -1.644462 | -0.759716 |
| 1  | 0 | -4.233550 | -0.102222 | -1.134528 |
| 1  | 0 | -3.485099 | -2.405719 | -1.134528 |
| 6  | 0 | 3.235626  | -0.318153 | -0.759716 |
| 6  | 0 | 2.804682  | -1.644462 | -0.759716 |
| 1  | 0 | 4.233550  | -0.102222 | -1.134528 |
| 1  | 0 | 3.485099  | -2.405719 | -1.134528 |
| 6  | 0 | -0.697282 | -3.175578 | -0.759716 |
| 1  | 0 | -1.211020 | -4.057934 | -1.134528 |
| 6  | 0 | 0.697282  | -3.175578 | -0.759716 |
| 1  | 0 | 1.211020  | -4.057934 | -1.134528 |
| 1  | 0 | 0.000000  | 0.000000  | 2.385703  |
| 17 | 0 | 0.000000  | 0.000000  | 3.667450  |

Adduct C<sub>20</sub>H<sub>10</sub>-HBr (type: ID<sub>Cora:cv</sub>)  
Symmetry C<sub>5v</sub>  
Energy MP2 = -3339.513281 au  
Standard Orientation

|   |   |           |           |           |
|---|---|-----------|-----------|-----------|
| 6 | 0 | 0.000000  | 1.201793  | -0.286313 |
| 6 | 0 | -1.142973 | 0.371374  | -0.286313 |
| 6 | 0 | 1.142973  | 0.371374  | -0.286313 |
| 6 | 0 | -0.706396 | -0.972271 | -0.286313 |
| 6 | 0 | 0.706396  | -0.972271 | -0.286313 |
| 6 | 0 | 0.000000  | 2.482122  | -0.826361 |
| 6 | 0 | -2.360638 | 0.767018  | -0.826361 |
| 6 | 0 | 2.360638  | 0.767018  | -0.826361 |
| 6 | 0 | -1.458955 | -2.008079 | -0.826361 |
| 6 | 0 | 1.458955  | -2.008079 | -0.826361 |
| 6 | 0 | -1.302567 | 2.979164  | -1.185274 |
| 6 | 0 | -2.430838 | 2.159427  | -1.185274 |
| 1 | 0 | -1.405742 | 3.995133  | -1.559638 |
| 1 | 0 | -3.365199 | 2.571504  | -1.559638 |
| 6 | 0 | 1.302567  | 2.979164  | -1.185274 |
| 6 | 0 | 2.430838  | 2.159427  | -1.185274 |
| 1 | 0 | 1.405742  | 3.995133  | -1.559638 |
| 1 | 0 | 3.365199  | 2.571504  | -1.559638 |
| 6 | 0 | -3.235869 | -0.318203 | -1.185274 |
| 6 | 0 | -2.804908 | -1.644565 | -1.185274 |
| 1 | 0 | -4.233995 | -0.102376 | -1.559638 |
| 1 | 0 | -3.485549 | -2.405856 | -1.559638 |
| 6 | 0 | 3.235869  | -0.318203 | -1.185274 |
| 6 | 0 | 2.804908  | -1.644565 | -1.185274 |
| 1 | 0 | 4.233995  | -0.102376 | -1.559638 |
| 1 | 0 | 3.485549  | -2.405856 | -1.559638 |

|    |   |           |           |           |
|----|---|-----------|-----------|-----------|
| 6  | 0 | -0.697310 | -3.175824 | -1.185274 |
| 1  | 0 | -1.211011 | -4.058405 | -1.559638 |
| 6  | 0 | 0.697310  | -3.175824 | -1.185274 |
| 1  | 0 | 1.211011  | -4.058405 | -1.559638 |
| 1  | 0 | 0.000000  | 0.000000  | 1.955468  |
| 35 | 0 | 0.000000  | 0.000000  | 3.375358  |

Adduct C<sub>20</sub>H<sub>10</sub>-HI (type: ID<sub>Cora:cv</sub>)  
Symmetry C<sub>5v</sub>  
Energy MP2 = -7684.862502 au  
Standard Orientation

|    |   |           |           |           |
|----|---|-----------|-----------|-----------|
| 6  | 0 | 0.000000  | 1.201653  | -0.669818 |
| 6  | 0 | -1.142840 | 0.371331  | -0.669818 |
| 6  | 0 | 1.142840  | 0.371331  | -0.669818 |
| 6  | 0 | -0.706314 | -0.972158 | -0.669818 |
| 6  | 0 | 0.706314  | -0.972158 | -0.669818 |
| 6  | 0 | 0.000000  | 2.481763  | -1.210113 |
| 6  | 0 | -2.360297 | 0.766907  | -1.210113 |
| 6  | 0 | 2.360297  | 0.766907  | -1.210113 |
| 6  | 0 | -1.458744 | -2.007788 | -1.210113 |
| 6  | 0 | 1.458744  | -2.007788 | -1.210113 |
| 6  | 0 | -1.302618 | 2.979238  | -1.568476 |
| 6  | 0 | -2.430892 | 2.159498  | -1.568476 |
| 1  | 0 | -1.405816 | 3.995369  | -1.942449 |
| 1  | 0 | -3.365401 | 2.571647  | -1.942449 |
| 6  | 0 | 1.302618  | 2.979238  | -1.568476 |
| 6  | 0 | 2.430892  | 2.159498  | -1.568476 |
| 1  | 0 | 1.405816  | 3.995369  | -1.942449 |
| 1  | 0 | 3.365401  | 2.571647  | -1.942449 |
| 6  | 0 | -3.235955 | -0.318228 | -1.568476 |
| 6  | 0 | -2.804992 | -1.644594 | -1.568476 |
| 1  | 0 | -4.234243 | -0.102374 | -1.942449 |
| 1  | 0 | -3.485748 | -2.406003 | -1.942449 |
| 6  | 0 | 3.235955  | -0.318228 | -1.568476 |
| 6  | 0 | 2.804992  | -1.644594 | -1.568476 |
| 1  | 0 | 4.234243  | -0.102374 | -1.942449 |
| 1  | 0 | 3.485748  | -2.406003 | -1.942449 |
| 6  | 0 | -0.697312 | -3.175914 | -1.568476 |
| 1  | 0 | -1.211090 | -4.058639 | -1.942449 |
| 6  | 0 | 0.697312  | -3.175914 | -1.568476 |
| 1  | 0 | 1.211090  | -4.058639 | -1.942449 |
| 1  | 0 | 0.000000  | 0.000000  | 1.562614  |
| 53 | 0 | 0.000000  | 0.000000  | 3.176761  |

Adduct C<sub>20</sub>H<sub>10</sub>-F<sub>2</sub> (type: ID<sub>Cora:cv</sub>)  
Symmetry C<sub>5v</sub>  
Energy MP2 = -965.465926 au  
Standard Orientation

|   |   |           |          |          |
|---|---|-----------|----------|----------|
| 6 | 0 | 0.000000  | 1.201754 | 0.142015 |
| 6 | 0 | -1.142936 | 0.371362 | 0.142015 |
| 6 | 0 | 1.142936  | 0.371362 | 0.142015 |

|   |   |           |           |           |
|---|---|-----------|-----------|-----------|
| 6 | 0 | -0.706373 | -0.972239 | 0.142015  |
| 6 | 0 | 0.706373  | -0.972239 | 0.142015  |
| 6 | 0 | 0.000000  | 2.480176  | -0.401782 |
| 6 | 0 | -2.358788 | 0.766417  | -0.401782 |
| 6 | 0 | 2.358788  | 0.766417  | -0.401782 |
| 6 | 0 | -1.457811 | -2.006505 | -0.401782 |
| 6 | 0 | 1.457811  | -2.006505 | -0.401782 |
| 6 | 0 | -1.301990 | 2.977825  | -0.763193 |
| 6 | 0 | -2.429743 | 2.158465  | -0.763193 |
| 1 | 0 | -1.403978 | 3.993169  | -1.139809 |
| 1 | 0 | -3.363876 | 2.569219  | -1.139809 |
| 6 | 0 | 1.301990  | 2.977825  | -0.763193 |
| 6 | 0 | 2.429743  | 2.158465  | -0.763193 |
| 1 | 0 | 1.403978  | 3.993169  | -1.139809 |
| 1 | 0 | 3.363876  | 2.569219  | -1.139809 |
| 6 | 0 | -3.234417 | -0.318068 | -0.763193 |
| 6 | 0 | -2.803654 | -1.643821 | -0.763193 |
| 1 | 0 | -4.231582 | -0.101305 | -1.139809 |
| 1 | 0 | -3.482968 | -2.405304 | -1.139809 |
| 6 | 0 | 3.234417  | -0.318068 | -0.763193 |
| 6 | 0 | 2.803654  | -1.643821 | -0.763193 |
| 1 | 0 | 4.231582  | -0.101305 | -1.139809 |
| 1 | 0 | 3.482968  | -2.405304 | -1.139809 |
| 6 | 0 | -0.696990 | -3.174402 | -0.763193 |
| 1 | 0 | -1.211284 | -4.055779 | -1.139809 |
| 6 | 0 | 0.696990  | -3.174402 | -0.763193 |
| 1 | 0 | 1.211284  | -4.055779 | -1.139809 |
| 9 | 0 | 0.000000  | 0.000000  | 2.908590  |
| 9 | 0 | 0.000000  | 0.000000  | 4.311707  |

Adduct C<sub>20</sub>H<sub>10</sub>-Cl<sub>2</sub> (type: ID<sub>Cora:cv</sub>)  
Symmetry C<sub>5v</sub>  
Energy MP2 = -1685.562745 au  
Standard Orientation

|   |   |           |           |           |
|---|---|-----------|-----------|-----------|
| 6 | 0 | 0.000000  | 1.201653  | -0.316103 |
| 6 | 0 | -1.142840 | 0.371331  | -0.316103 |
| 6 | 0 | 1.142840  | 0.371331  | -0.316103 |
| 6 | 0 | -0.706314 | -0.972158 | -0.316103 |
| 6 | 0 | 0.706314  | -0.972158 | -0.316103 |
| 6 | 0 | 0.000000  | 2.481548  | -0.856292 |
| 6 | 0 | -2.360092 | 0.766841  | -0.856292 |
| 6 | 0 | 2.360092  | 0.766841  | -0.856292 |
| 6 | 0 | -1.458617 | -2.007615 | -0.856292 |
| 6 | 0 | 1.458617  | -2.007615 | -0.856292 |
| 6 | 0 | -1.302685 | 2.979132  | -1.215089 |
| 6 | 0 | -2.430771 | 2.159530  | -1.215089 |
| 1 | 0 | -1.405756 | 3.995292  | -1.589148 |
| 1 | 0 | -3.365346 | 2.571567  | -1.589148 |
| 6 | 0 | 1.302685  | 2.979132  | -1.215089 |
| 6 | 0 | 2.430771  | 2.159530  | -1.215089 |
| 1 | 0 | 1.405756  | 3.995292  | -1.589148 |
| 1 | 0 | 3.365346  | 2.571567  | -1.589148 |

|    |   |           |           |           |
|----|---|-----------|-----------|-----------|
| 6  | 0 | -3.235875 | -0.318325 | -1.215089 |
| 6  | 0 | -2.804984 | -1.644469 | -1.215089 |
| 1  | 0 | -4.234151 | -0.102340 | -1.589148 |
| 1  | 0 | -3.485654 | -2.405976 | -1.589148 |
| 6  | 0 | 3.235875  | -0.318325 | -1.215089 |
| 6  | 0 | 2.804984  | -1.644469 | -1.215089 |
| 1  | 0 | 4.234151  | -0.102340 | -1.589148 |
| 1  | 0 | 3.485654  | -2.405976 | -1.589148 |
| 6  | 0 | -0.697195 | -3.175867 | -1.215089 |
| 1  | 0 | -1.211093 | -4.058542 | -1.589148 |
| 6  | 0 | 0.697195  | -3.175867 | -1.215089 |
| 1  | 0 | 1.211093  | -4.058542 | -1.589148 |
| 17 | 0 | 0.000000  | 0.000000  | 2.650083  |
| 17 | 0 | 0.000000  | 0.000000  | 4.642191  |

Adduct C<sub>20</sub>H<sub>10</sub>-Br<sub>2</sub> (type: ID<sub>Cora:cv</sub>)  
Symmetry C<sub>5v</sub>  
Energy MP2 = -5911.625030 au  
Standard Orientation

|    |   |           |           |           |
|----|---|-----------|-----------|-----------|
| 6  | 0 | 0.000000  | 1.201651  | -1.054572 |
| 6  | 0 | -1.142838 | 0.371331  | -1.054572 |
| 6  | 0 | 1.142838  | 0.371331  | -1.054572 |
| 6  | 0 | -0.706313 | -0.972156 | -1.054572 |
| 6  | 0 | 0.706313  | -0.972156 | -1.054572 |
| 6  | 0 | 0.000000  | 2.482470  | -1.592398 |
| 6  | 0 | -2.360969 | 0.767125  | -1.592398 |
| 6  | 0 | 2.360969  | 0.767125  | -1.592398 |
| 6  | 0 | -1.459159 | -2.008360 | -1.592398 |
| 6  | 0 | 1.459159  | -2.008360 | -1.592398 |
| 6  | 0 | -1.303203 | 2.980065  | -1.949443 |
| 6  | 0 | -2.431498 | 2.160310  | -1.949443 |
| 1  | 0 | -1.407028 | 3.996756  | -2.321834 |
| 1  | 0 | -3.366345 | 2.573229  | -2.321834 |
| 6  | 0 | 1.303203  | 2.980065  | -1.949443 |
| 6  | 0 | 2.431498  | 2.160310  | -1.949443 |
| 1  | 0 | 1.407028  | 3.996756  | -2.321834 |
| 1  | 0 | 3.366345  | 2.573229  | -2.321834 |
| 6  | 0 | -3.236922 | -0.318529 | -1.949443 |
| 6  | 0 | -2.805952 | -1.644920 | -1.949443 |
| 1  | 0 | -4.235936 | -0.103098 | -2.321834 |
| 1  | 0 | -3.487544 | -2.406413 | -2.321834 |
| 6  | 0 | 3.236922  | -0.318529 | -1.949443 |
| 6  | 0 | 2.805952  | -1.644920 | -1.949443 |
| 1  | 0 | 4.235936  | -0.103098 | -2.321834 |
| 1  | 0 | 3.487544  | -2.406413 | -2.321834 |
| 6  | 0 | -0.697325 | -3.176927 | -1.949443 |
| 1  | 0 | -1.210925 | -4.060474 | -2.321834 |
| 6  | 0 | 0.697325  | -3.176927 | -1.949443 |
| 1  | 0 | 1.210925  | -4.060474 | -2.321834 |
| 35 | 0 | 0.000000  | 0.000000  | 1.997520  |
| 35 | 0 | 0.000000  | 0.000000  | 4.276595  |

|                      |                                                                                |           |           |           |
|----------------------|--------------------------------------------------------------------------------|-----------|-----------|-----------|
| Adduct               | C <sub>20</sub> H <sub>10</sub> -I <sub>2</sub> (type: ID <sub>Cora:cv</sub> ) |           |           |           |
| Symmetry             | C <sub>5v</sub>                                                                |           |           |           |
| Energy               | MP2 = -14602.362851 au                                                         |           |           |           |
| Standard Orientation |                                                                                |           |           |           |
| 6                    | 0                                                                              | 0.000000  | 1.201482  | -1.668994 |
| 6                    | 0                                                                              | -1.142677 | 0.371278  | -1.668994 |
| 6                    | 0                                                                              | 1.142677  | 0.371278  | -1.668994 |
| 6                    | 0                                                                              | -0.706213 | -0.972019 | -1.668994 |
| 6                    | 0                                                                              | 0.706213  | -0.972019 | -1.668994 |
| 6                    | 0                                                                              | 0.000000  | 2.482890  | -2.204835 |
| 6                    | 0                                                                              | -2.361369 | 0.767255  | -2.204835 |
| 6                    | 0                                                                              | 2.361369  | 0.767255  | -2.204835 |
| 6                    | 0                                                                              | -1.459406 | -2.008700 | -2.204835 |
| 6                    | 0                                                                              | 1.459406  | -2.008700 | -2.204835 |
| 6                    | 0                                                                              | -1.303661 | 2.980956  | -2.559405 |
| 6                    | 0                                                                              | -2.432204 | 2.161021  | -2.559405 |
| 1                    | 0                                                                              | -1.408183 | 3.998257  | -2.929924 |
| 1                    | 0                                                                              | -3.367416 | 2.574791  | -2.929924 |
| 6                    | 0                                                                              | 1.303661  | 2.980956  | -2.559405 |
| 6                    | 0                                                                              | 2.432204  | 2.161021  | -2.559405 |
| 1                    | 0                                                                              | 1.408183  | 3.998257  | -2.929924 |
| 1                    | 0                                                                              | 3.367416  | 2.574791  | -2.929924 |
| 6                    | 0                                                                              | -3.237911 | -0.318689 | -2.559405 |
| 6                    | 0                                                                              | -2.806846 | -1.645371 | -2.559405 |
| 1                    | 0                                                                              | -4.237721 | -0.103732 | -2.929924 |
| 1                    | 0                                                                              | -3.489360 | -2.406949 | -2.929924 |
| 6                    | 0                                                                              | 3.237911  | -0.318689 | -2.559405 |
| 6                    | 0                                                                              | 2.806846  | -1.645371 | -2.559405 |
| 1                    | 0                                                                              | 4.237721  | -0.103732 | -2.929924 |
| 1                    | 0                                                                              | 3.489360  | -2.406949 | -2.929924 |
| 6                    | 0                                                                              | -0.697478 | -3.177917 | -2.559405 |
| 1                    | 0                                                                              | -1.210873 | -4.062367 | -2.929924 |
| 6                    | 0                                                                              | 0.697478  | -3.177917 | -2.559405 |
| 1                    | 0                                                                              | 1.210873  | -4.062367 | -2.929924 |
| 53                   | 0                                                                              | 0.000000  | 0.000000  | 1.487615  |
| 53                   | 0                                                                              | 0.000000  | 0.000000  | 4.155374  |

|                      |                                                                     |           |           |           |
|----------------------|---------------------------------------------------------------------|-----------|-----------|-----------|
| Adduct               | C <sub>20</sub> H <sub>10</sub> -ClF (type: ID <sub>Cora:cv</sub> ) |           |           |           |
| Symmetry             | C <sub>5v</sub>                                                     |           |           |           |
| Energy               | MP2 = -1325.540965 au                                               |           |           |           |
| Standard Orientation |                                                                     |           |           |           |
| 6                    | 0                                                                   | 0.000000  | 1.201784  | -0.061925 |
| 6                    | 0                                                                   | -1.142964 | 0.371372  | -0.061925 |
| 6                    | 0                                                                   | 1.142964  | 0.371372  | -0.061925 |
| 6                    | 0                                                                   | -0.706391 | -0.972264 | -0.061925 |
| 6                    | 0                                                                   | 0.706391  | -0.972264 | -0.061925 |
| 6                    | 0                                                                   | 0.000000  | 2.482245  | -0.600754 |
| 6                    | 0                                                                   | -2.360755 | 0.767056  | -0.600754 |
| 6                    | 0                                                                   | 2.360755  | 0.767056  | -0.600754 |
| 6                    | 0                                                                   | -1.459027 | -2.008178 | -0.600754 |
| 6                    | 0                                                                   | 1.459027  | -2.008178 | -0.600754 |

|    |   |           |           |           |
|----|---|-----------|-----------|-----------|
| 6  | 0 | -1.302909 | 2.979536  | -0.959064 |
| 6  | 0 | -2.431086 | 2.159867  | -0.959064 |
| 1  | 0 | -1.406323 | 3.995789  | -1.332672 |
| 1  | 0 | -3.365643 | 2.572259  | -1.332672 |
| 6  | 0 | 1.302909  | 2.979536  | -0.959064 |
| 6  | 0 | 2.431086  | 2.159867  | -0.959064 |
| 1  | 0 | 1.406323  | 3.995789  | -1.332672 |
| 1  | 0 | 3.365643  | 2.572259  | -1.332672 |
| 6  | 0 | -3.236328 | -0.318413 | -0.959064 |
| 6  | 0 | -2.805403 | -1.644664 | -0.959064 |
| 1  | 0 | -4.234799 | -0.102726 | -1.332672 |
| 1  | 0 | -3.486405 | -2.406045 | -1.332672 |
| 6  | 0 | 3.236328  | -0.318413 | -0.959064 |
| 6  | 0 | 2.805403  | -1.644664 | -0.959064 |
| 1  | 0 | 4.234799  | -0.102726 | -1.332672 |
| 1  | 0 | 3.486405  | -2.406045 | -1.332672 |
| 6  | 0 | -0.697252 | -3.176326 | -0.959064 |
| 1  | 0 | -1.210927 | -4.059277 | -1.332672 |
| 6  | 0 | 0.697252  | -3.176326 | -0.959064 |
| 1  | 0 | 1.210927  | -4.059277 | -1.332672 |
| 17 | 0 | 0.000000  | 0.000000  | 2.921286  |
| 9  | 0 | 0.000000  | 0.000000  | 4.565450  |

Adduct C<sub>20</sub>H<sub>10</sub>-BrF (type: ID<sub>Cora:cv</sub>)  
Symmetry C<sub>5v</sub>  
Energy MP2 = -3438.580448 au  
Standard Orientation

|   |   |           |           |           |
|---|---|-----------|-----------|-----------|
| 6 | 0 | 0.000000  | 1.201861  | -0.385041 |
| 6 | 0 | -1.143038 | 0.371395  | -0.385041 |
| 6 | 0 | 1.143038  | 0.371395  | -0.385041 |
| 6 | 0 | -0.706436 | -0.972326 | -0.385041 |
| 6 | 0 | 0.706436  | -0.972326 | -0.385041 |
| 6 | 0 | 0.000000  | 2.483138  | -0.921635 |
| 6 | 0 | -2.361605 | 0.767332  | -0.921635 |
| 6 | 0 | 2.361605  | 0.767332  | -0.921635 |
| 6 | 0 | -1.459552 | -2.008901 | -0.921635 |
| 6 | 0 | 1.459552  | -2.008901 | -0.921635 |
| 6 | 0 | -1.303421 | 2.980473  | -1.277965 |
| 6 | 0 | -2.431819 | 2.160644  | -1.277965 |
| 1 | 0 | -1.407598 | 3.997266  | -1.649822 |
| 1 | 0 | -3.366654 | 2.573928  | -1.649822 |
| 6 | 0 | 1.303421  | 2.980473  | -1.277965 |
| 6 | 0 | 2.431819  | 2.160644  | -1.277965 |
| 1 | 0 | 1.407598  | 3.997266  | -1.649822 |
| 1 | 0 | 3.366654  | 2.573928  | -1.649822 |
| 6 | 0 | -3.237378 | -0.318610 | -1.277965 |
| 6 | 0 | -2.806368 | -1.645122 | -1.277965 |
| 1 | 0 | -4.236598 | -0.103482 | -1.649822 |
| 1 | 0 | -3.488305 | -2.406491 | -1.649822 |
| 6 | 0 | 3.237378  | -0.318610 | -1.277965 |
| 6 | 0 | 2.806368  | -1.645122 | -1.277965 |
| 1 | 0 | 4.236598  | -0.103482 | -1.649822 |

|    |   |           |           |           |
|----|---|-----------|-----------|-----------|
| 1  | 0 | 3.488305  | -2.406491 | -1.649822 |
| 6  | 0 | -0.697388 | -3.177385 | -1.277965 |
| 1  | 0 | -1.210763 | -4.061222 | -1.649822 |
| 6  | 0 | 0.697388  | -3.177385 | -1.277965 |
| 1  | 0 | 1.210763  | -4.061222 | -1.649822 |
| 35 | 0 | 0.000000  | 0.000000  | 2.644815  |
| 9  | 0 | 0.000000  | 0.000000  | 4.423099  |

Adduct C<sub>20</sub>H<sub>10</sub>-IF (type: ID<sub>Cora:cv</sub>)  
Symmetry C<sub>5v</sub>  
Energy MP2 = -7783.976074 au  
Standard Orientation

|    |   |           |           |           |
|----|---|-----------|-----------|-----------|
| 6  | 0 | -0.706877 | 0.972932  | -1.510342 |
| 6  | 0 | 0.706877  | 0.972932  | -1.510342 |
| 6  | 0 | -1.143750 | -0.371627 | -1.510342 |
| 6  | 0 | 1.143750  | -0.371627 | -1.510342 |
| 6  | 0 | 0.000000  | -1.202610 | -1.510342 |
| 6  | 0 | -1.460075 | 2.009621  | -0.970695 |
| 6  | 0 | 1.460075  | 2.009621  | -0.970695 |
| 6  | 0 | -2.362451 | -0.767607 | -0.970695 |
| 6  | 0 | 2.362451  | -0.767607 | -0.970695 |
| 6  | 0 | 0.000000  | -2.484028 | -0.970695 |
| 6  | 0 | -0.697631 | 3.176193  | -0.611120 |
| 6  | 0 | 0.697631  | 3.176193  | -0.611120 |
| 1  | 0 | -1.210606 | 4.056992  | -0.231715 |
| 1  | 0 | 1.210606  | 4.056992  | -0.231715 |
| 6  | 0 | -2.805159 | 1.644984  | -0.611120 |
| 6  | 0 | -3.236319 | 0.318011  | -0.611120 |
| 1  | 0 | -3.484331 | 2.405034  | -0.231715 |
| 1  | 0 | -4.232527 | 0.102325  | -0.231715 |
| 6  | 0 | 2.805159  | 1.644984  | -0.611120 |
| 6  | 0 | 3.236319  | 0.318011  | -0.611120 |
| 1  | 0 | 3.484331  | 2.405034  | -0.231715 |
| 1  | 0 | 4.232527  | 0.102325  | -0.231715 |
| 6  | 0 | -2.431315 | -2.159537 | -0.611120 |
| 6  | 0 | -1.302524 | -2.979651 | -0.611120 |
| 1  | 0 | -3.364041 | -2.570599 | -0.231715 |
| 1  | 0 | -1.405239 | -3.993752 | -0.231715 |
| 6  | 0 | 2.431315  | -2.159537 | -0.611120 |
| 1  | 0 | 3.364041  | -2.570599 | -0.231715 |
| 6  | 0 | 1.302524  | -2.979651 | -0.611120 |
| 1  | 0 | 1.405239  | -3.993752 | -0.231715 |
| 53 | 0 | 0.000000  | 0.000000  | 1.548418  |
| 9  | 0 | 0.000000  | 0.000000  | 3.483260  |

Adduct C<sub>20</sub>H<sub>10</sub>-HF (type: IA<sub>Cora:cc</sub>)  
Symmetry C<sub>1</sub>  
Energy MP2 = -866.530331 au  
Standard Orientation

|   |   |          |           |           |
|---|---|----------|-----------|-----------|
| 6 | 0 | 1.177382 | -0.000742 | -0.822699 |
| 6 | 0 | 0.346302 | 1.144700  | -0.820370 |



|   |   |           |           |           |
|---|---|-----------|-----------|-----------|
| 6 | 0 | -0.997605 | 0.707225  | -0.811100 |
| 6 | 0 | -0.998486 | -0.705992 | -0.811096 |
| 6 | 0 | 0.344872  | -1.145145 | -0.820365 |
| 6 | 0 | 2.461543  | -0.001542 | -0.283677 |
| 6 | 0 | 2.961283  | 1.299806  | 0.077942  |
| 6 | 0 | 2.140925  | 2.426869  | 0.083769  |
| 1 | 0 | 3.976594  | 1.399097  | 0.454604  |
| 1 | 0 | 2.550842  | 3.358128  | 0.467811  |
| 6 | 0 | 0.747498  | 2.357630  | -0.270543 |
| 6 | 0 | -0.330627 | 3.232118  | 0.108315  |
| 6 | 0 | -1.654886 | 2.799635  | 0.122310  |
| 1 | 0 | -0.107773 | 4.224842  | 0.492289  |
| 1 | 0 | -2.411481 | 3.472825  | 0.518855  |
| 6 | 0 | -2.021055 | 1.456612  | -0.242337 |
| 6 | 0 | -3.182504 | 0.698601  | 0.139745  |
| 6 | 0 | -3.183374 | -0.694636 | 0.139749  |
| 1 | 0 | -4.053163 | 1.214383  | 0.538134  |
| 1 | 0 | -4.054676 | -1.209328 | 0.538141  |
| 6 | 0 | -2.022871 | -1.454099 | -0.242328 |
| 6 | 0 | -1.658380 | -2.797575 | 0.122326  |
| 6 | 0 | -0.334661 | -3.231710 | 0.108334  |
| 1 | 0 | -2.415815 | -3.469818 | 0.518874  |
| 1 | 0 | -0.113047 | -4.224709 | 0.492314  |
| 6 | 0 | 0.744554  | -2.358571 | -0.270529 |
| 6 | 0 | 2.137894  | -2.429548 | 0.083782  |
| 6 | 0 | 2.959659  | -1.303510 | 0.077949  |
| 1 | 0 | 2.546648  | -3.361316 | 0.467829  |
| 1 | 0 | 3.974845  | -1.404067 | 0.454610  |
| 1 | 0 | 0.605676  | -0.000292 | 1.360798  |
| 9 | 0 | 0.186287  | -0.000057 | 2.186743  |

Adduct  
Symmetry  
Energy  
Standard Orientation

C<sub>20</sub>H<sub>10</sub>-HCl (type: IIA<sub>Cora:cc</sub>)  
C<sub>s</sub>  
MP2 = -1226.507161 au

|   |   |           |           |           |
|---|---|-----------|-----------|-----------|
| 6 | 0 | 0.368869  | -0.971800 | 1.145042  |
| 6 | 0 | 1.200661  | -0.968781 | 0.000000  |
| 6 | 0 | 0.368869  | -0.971800 | -1.145042 |
| 6 | 0 | -0.974756 | -0.971963 | -0.706729 |
| 6 | 0 | -0.974756 | -0.971963 | 0.706729  |
| 6 | 0 | 0.761333  | -0.404979 | 2.353827  |
| 6 | 0 | 2.146778  | -0.024177 | 2.424370  |
| 6 | 0 | 2.967519  | -0.021133 | 1.298366  |
| 1 | 0 | 2.546983  | 0.373441  | 3.354309  |
| 1 | 0 | 3.975467  | 0.376246  | 1.393588  |
| 6 | 0 | 2.473355  | -0.400295 | 0.000000  |
| 6 | 0 | 2.967519  | -0.021133 | -1.298366 |
| 6 | 0 | 2.146778  | -0.024177 | -2.424370 |
| 1 | 0 | 3.975467  | 0.376246  | -1.393588 |
| 1 | 0 | 2.546983  | 0.373441  | -3.354309 |
| 6 | 0 | 0.761333  | -0.404979 | -2.353827 |
| 6 | 0 | -0.317972 | -0.028361 | -3.226415 |

|    |   |           |           |           |
|----|---|-----------|-----------|-----------|
| 6  | 0 | -1.641450 | -0.027298 | -2.793909 |
| 1  | 0 | -0.096214 | 0.365503  | -4.215622 |
| 1  | 0 | -2.402549 | 0.368319  | -3.462742 |
| 6  | 0 | -2.001210 | -0.402634 | -1.453124 |
| 6  | 0 | -3.163089 | -0.022898 | -0.696362 |
| 6  | 0 | -3.163089 | -0.022898 | 0.696362  |
| 1  | 0 | -4.034060 | 0.373903  | -1.213167 |
| 1  | 0 | -4.034060 | 0.373903  | 1.213167  |
| 6  | 0 | -2.001210 | -0.402634 | 1.453124  |
| 6  | 0 | -1.641450 | -0.027298 | 2.793909  |
| 6  | 0 | -0.317972 | -0.028361 | 3.226415  |
| 1  | 0 | -2.402549 | 0.368319  | 3.462742  |
| 1  | 0 | -0.096214 | 0.365503  | 4.215622  |
| 1  | 0 | 0.891023  | 1.328295  | 0.000000  |
| 17 | 0 | -0.039215 | 2.216133  | 0.000000  |

Adduct C<sub>20</sub>H<sub>10</sub>-HBr (type: IIA<sub>Cora:cc</sub>)  
Symmetry C<sub>1</sub>  
Energy MP2 = -3339.522197 au  
Standard Orientation

|    |   |           |           |           |
|----|---|-----------|-----------|-----------|
| 6  | 0 | -0.399026 | 1.144750  | -1.226538 |
| 6  | 0 | -1.230510 | -0.000076 | -1.212615 |
| 6  | 0 | -0.398877 | -1.144794 | -1.226541 |
| 6  | 0 | 0.944404  | -0.706623 | -1.245935 |
| 6  | 0 | 0.944312  | 0.706754  | -1.245932 |
| 6  | 0 | -0.783573 | 2.353708  | -0.654770 |
| 6  | 0 | -2.164295 | 2.424457  | -0.256883 |
| 6  | 0 | -2.985459 | 1.298613  | -0.243974 |
| 1  | 0 | -2.559691 | 3.354552  | 0.145207  |
| 1  | 0 | -3.988656 | 1.394456  | 0.165169  |
| 6  | 0 | -2.496231 | -0.000160 | -0.628553 |
| 6  | 0 | -2.985289 | -1.298996 | -0.243977 |
| 6  | 0 | -2.163979 | -2.424735 | -0.256891 |
| 1  | 0 | -3.988474 | -1.394971 | 0.165166  |
| 1  | 0 | -2.559254 | -3.354882 | 0.145197  |
| 6  | 0 | -0.783266 | -2.353806 | -0.654779 |
| 6  | 0 | 0.301744  | -3.226505 | -0.295017 |
| 6  | 0 | 1.625511  | -2.794437 | -0.314198 |
| 1  | 0 | 0.086098  | -4.216038 | 0.101461  |
| 1  | 0 | 2.392303  | -3.464173 | 0.068743  |
| 6  | 0 | 1.980014  | -1.453435 | -0.693954 |
| 6  | 0 | 3.148056  | -0.696298 | -0.334057 |
| 6  | 0 | 3.147965  | 0.696713  | -0.334054 |
| 1  | 0 | 4.026057  | -1.212817 | 0.047412  |
| 1  | 0 | 4.025898  | 1.213345  | 0.047416  |
| 6  | 0 | 1.979824  | 1.453700  | -0.693949 |
| 6  | 0 | 1.625146  | 2.794653  | -0.314188 |
| 6  | 0 | 0.301323  | 3.226549  | -0.295005 |
| 1  | 0 | 2.391851  | 3.464489  | 0.068755  |
| 1  | 0 | 0.085548  | 4.216051  | 0.101477  |
| 1  | 0 | -0.940920 | -0.000074 | 1.082603  |
| 35 | 0 | 0.096642  | -0.000003 | 2.059778  |

|                      |                                                                     |           |           |           |
|----------------------|---------------------------------------------------------------------|-----------|-----------|-----------|
| Adduct               | C <sub>20</sub> H <sub>10</sub> -HI (type: IIA <sub>Cora:cc</sub> ) |           |           |           |
| Symmetry             | C <sub>1</sub>                                                      |           |           |           |
| Energy               | MP2 = -7684.856905 au                                               |           |           |           |
| Standard Orientation |                                                                     |           |           |           |
| 6                    | 0                                                                   | -0.475235 | 1.143883  | -1.451983 |
| 6                    | 0                                                                   | -1.306017 | 0.000111  | -1.411035 |
| 6                    | 0                                                                   | -0.475434 | -1.143808 | -1.451976 |
| 6                    | 0                                                                   | 0.866333  | -0.706692 | -1.522770 |
| 6                    | 0                                                                   | 0.866455  | 0.706533  | -1.522774 |
| 6                    | 0                                                                   | -0.837251 | 2.352517  | -0.865301 |
| 6                    | 0                                                                   | -2.203840 | 2.424531  | -0.420935 |
| 6                    | 0                                                                   | -3.025641 | 1.299408  | -0.382987 |
| 1                    | 0                                                                   | -2.585235 | 3.354723  | -0.005747 |
| 1                    | 0                                                                   | -4.015205 | 1.396383  | 0.058063  |
| 6                    | 0                                                                   | -2.550633 | 0.000220  | -0.784623 |
| 6                    | 0                                                                   | -3.025867 | -1.298883 | -0.382981 |
| 6                    | 0                                                                   | -2.204263 | -2.424151 | -0.420927 |
| 1                    | 0                                                                   | -4.015447 | -1.395685 | 0.058071  |
| 1                    | 0                                                                   | -2.585821 | -3.354275 | -0.005735 |
| 6                    | 0                                                                   | -0.837661 | -2.352377 | -0.865293 |
| 6                    | 0                                                                   | 0.260836  | -3.225716 | -0.549505 |
| 6                    | 0                                                                   | 1.583697  | -2.795481 | -0.623010 |
| 1                    | 0                                                                   | 0.061006  | -4.215439 | -0.145319 |
| 1                    | 0                                                                   | 2.364496  | -3.467125 | -0.273191 |
| 6                    | 0                                                                   | 1.923890  | -1.454205 | -1.015499 |
| 6                    | 0                                                                   | 3.107556  | -0.696957 | -0.709238 |
| 6                    | 0                                                                   | 3.107677  | 0.696411  | -0.709241 |
| 1                    | 0                                                                   | 4.002366  | -1.213226 | -0.368682 |
| 1                    | 0                                                                   | 4.002578  | 1.212526  | -0.368688 |
| 6                    | 0                                                                   | 1.924143  | 1.453865  | -1.015506 |
| 6                    | 0                                                                   | 1.584184  | 2.795201  | -0.623024 |
| 6                    | 0                                                                   | 0.261398  | 3.225666  | -0.549519 |
| 1                    | 0                                                                   | 2.365100  | 3.466712  | -0.273209 |
| 1                    | 0                                                                   | 0.061741  | 4.215425  | -0.145337 |
| 1                    | 0                                                                   | -1.100911 | -0.000072 | 0.995081  |
| 53                   | 0                                                                   | 0.192064  | -0.000007 | 1.964971  |

|                      |                                                                                 |           |           |           |
|----------------------|---------------------------------------------------------------------------------|-----------|-----------|-----------|
| Adduct               | C <sub>20</sub> H <sub>10</sub> -F <sub>2</sub> (type: IIA <sub>Cora:cc</sub> ) |           |           |           |
| Symmetry             | C <sub>s</sub>                                                                  |           |           |           |
| Energy               | MP2 = -965.471209 au                                                            |           |           |           |
| Standard Orientation |                                                                                 |           |           |           |
| 6                    | 0                                                                               | -0.949396 | -0.956746 | 0.706815  |
| 6                    | 0                                                                               | -0.949396 | -0.956746 | -0.706815 |
| 6                    | 0                                                                               | -0.938510 | 0.387866  | -1.143211 |
| 6                    | 0                                                                               | -0.936311 | 1.219477  | 0.000000  |
| 6                    | 0                                                                               | -0.938510 | 0.387866  | 1.143211  |
| 6                    | 0                                                                               | -0.396925 | -1.990285 | 1.455047  |
| 6                    | 0                                                                               | -0.026973 | -3.155435 | 0.696829  |
| 6                    | 0                                                                               | -0.026973 | -3.155435 | -0.696829 |
| 1                    | 0                                                                               | 0.356998  | -4.032769 | 1.212949  |

|   |   |           |           |           |
|---|---|-----------|-----------|-----------|
| 1 | 0 | 0.356998  | -4.032769 | -1.212949 |
| 6 | 0 | -0.396925 | -1.990285 | -1.455047 |
| 6 | 0 | -0.018191 | -1.632249 | -2.796007 |
| 6 | 0 | -0.005149 | -0.307407 | -3.225251 |
| 1 | 0 | 0.364345  | -2.396849 | -3.468590 |
| 1 | 0 | 0.387477  | -0.089396 | -4.215999 |
| 6 | 0 | -0.370708 | 0.776033  | -2.351781 |
| 6 | 0 | 0.014173  | 2.160232  | -2.423212 |
| 6 | 0 | 0.017264  | 2.979841  | -1.296910 |
| 1 | 0 | 0.409326  | 2.560712  | -3.354222 |
| 1 | 0 | 0.413182  | 3.988546  | -1.393166 |
| 6 | 0 | -0.365045 | 2.487235  | 0.000000  |
| 6 | 0 | 0.017264  | 2.979841  | 1.296910  |
| 6 | 0 | 0.014173  | 2.160232  | 2.423212  |
| 1 | 0 | 0.413182  | 3.988546  | 1.393166  |
| 1 | 0 | 0.409326  | 2.560712  | 3.354222  |
| 6 | 0 | -0.370708 | 0.776033  | 2.351781  |
| 6 | 0 | -0.005149 | -0.307407 | 3.225251  |
| 6 | 0 | -0.018191 | -1.632249 | 2.796007  |
| 1 | 0 | 0.387477  | -0.089396 | 4.215999  |
| 1 | 0 | 0.364345  | -2.396849 | 3.468590  |
| 9 | 0 | 2.037817  | -0.781484 | 0.000000  |
| 9 | 0 | 1.966456  | 0.621156  | 0.000000  |

Adduct  
Symmetry  
Energy  
Standard Orientation

C<sub>20</sub>H<sub>10</sub>-Cl<sub>2</sub> (type: IIA<sub>Coro:cc</sub>)  
C<sub>1</sub>  
MP2 = -1685.573434 au

|   |   |           |           |           |
|---|---|-----------|-----------|-----------|
| 6 | 0 | 0.425914  | -1.141603 | -1.183148 |
| 6 | 0 | 1.258755  | 0.000257  | -1.176968 |
| 6 | 0 | 0.425504  | 1.141818  | -1.183110 |
| 6 | 0 | -0.917866 | 0.706305  | -1.220367 |
| 6 | 0 | -0.917611 | -0.706571 | -1.220384 |
| 6 | 0 | 0.804050  | -2.348538 | -0.604786 |
| 6 | 0 | 2.185215  | -2.421094 | -0.210295 |
| 6 | 0 | 3.010397  | -1.297094 | -0.211535 |
| 1 | 0 | 2.580958  | -3.350009 | 0.194521  |
| 1 | 0 | 4.017692  | -1.396343 | 0.187779  |
| 6 | 0 | 2.524350  | 0.000476  | -0.601834 |
| 6 | 0 | 3.009931  | 1.298206  | -0.211491 |
| 6 | 0 | 2.184342  | 2.421907  | -0.210208 |
| 1 | 0 | 4.017189  | 1.397804  | 0.187829  |
| 1 | 0 | 2.579751  | 3.350951  | 0.194640  |
| 6 | 0 | 0.803203  | 2.348866  | -0.604704 |
| 6 | 0 | -0.289597 | 3.218529  | -0.255684 |
| 6 | 0 | -1.615964 | 2.793317  | -0.307874 |
| 1 | 0 | -0.080922 | 4.206173  | 0.149570  |
| 1 | 0 | -2.387808 | 3.467035  | 0.057810  |
| 6 | 0 | -1.968994 | 1.456207  | -0.705213 |
| 6 | 0 | -3.148797 | 0.697520  | -0.386082 |
| 6 | 0 | -3.148543 | -0.698607 | -0.386095 |
| 1 | 0 | -4.043219 | 1.212209  | -0.041024 |

|    |   |           |           |           |
|----|---|-----------|-----------|-----------|
| 1  | 0 | -4.042778 | -1.213627 | -0.041041 |
| 6  | 0 | -1.968468 | -1.456862 | -0.705241 |
| 6  | 0 | -1.614955 | -2.793855 | -0.307937 |
| 6  | 0 | -0.288438 | -3.218598 | -0.255777 |
| 1  | 0 | -2.386556 | -3.467857 | 0.057740  |
| 1  | 0 | -0.079405 | -4.206179 | 0.149448  |
| 17 | 0 | 0.856762  | -0.000124 | 2.037301  |
| 17 | 0 | -1.132613 | -0.000092 | 2.115353  |

Adduct C<sub>20</sub>H<sub>10</sub>-Br<sub>2</sub> (type: IIB<sub>Cora:cc</sub>)  
Symmetry C<sub>s</sub>  
Energy MP2 = -5911.636107 au  
Standard Orientation

|    |   |           |           |           |
|----|---|-----------|-----------|-----------|
| 6  | 0 | 0.851325  | 1.934139  | 0.707915  |
| 6  | 0 | 0.851325  | 1.934139  | -0.707915 |
| 6  | 0 | 1.549934  | 0.785006  | -1.144820 |
| 6  | 0 | 1.976284  | 0.072798  | 0.000000  |
| 6  | 0 | 1.549934  | 0.785006  | 1.144820  |
| 6  | 0 | -0.174190 | 2.511112  | 1.453947  |
| 6  | 0 | -1.110509 | 3.297921  | 0.696821  |
| 6  | 0 | -1.110509 | 3.297921  | -0.696821 |
| 1  | 0 | -1.906529 | 3.829154  | 1.214133  |
| 1  | 0 | -1.906529 | 3.829154  | -1.214133 |
| 6  | 0 | -0.174190 | 2.511112  | -1.453947 |
| 6  | 0 | -0.313328 | 2.006968  | -2.793318 |
| 6  | 0 | 0.374084  | 0.875000  | -3.222351 |
| 1  | 0 | -1.049357 | 2.450681  | -3.460096 |
| 1  | 0 | 0.148569  | 0.475765  | -4.208799 |
| 6  | 0 | 1.258296  | 0.151357  | -2.349854 |
| 6  | 0 | 1.641750  | -1.232209 | -2.420695 |
| 6  | 0 | 2.061725  | -1.933527 | -1.293410 |
| 1  | 0 | 1.503385  | -1.780619 | -3.349905 |
| 1  | 0 | 2.236279  | -3.003397 | -1.384294 |
| 6  | 0 | 2.134848  | -1.310657 | 0.000000  |
| 6  | 0 | 2.061725  | -1.933527 | 1.293410  |
| 6  | 0 | 1.641750  | -1.232209 | 2.420695  |
| 1  | 0 | 2.236279  | -3.003397 | 1.384294  |
| 1  | 0 | 1.503385  | -1.780619 | 3.349905  |
| 6  | 0 | 1.258296  | 0.151357  | 2.349854  |
| 6  | 0 | 0.374084  | 0.875000  | 3.222351  |
| 6  | 0 | -0.313328 | 2.006968  | 2.793318  |
| 1  | 0 | 0.148569  | 0.475765  | 4.208799  |
| 1  | 0 | -1.049357 | 2.450681  | 3.460096  |
| 35 | 0 | -1.389091 | -0.252955 | 0.000000  |
| 35 | 0 | -1.473781 | -2.526051 | 0.000000  |

Adduct C<sub>20</sub>H<sub>10</sub>-I<sub>2</sub> (type: IIB<sub>Cora:cc</sub>)  
Symmetry C<sub>s</sub>  
Energy MP2 = -14602.374392 au  
Standard Orientation

|   |   |           |           |          |
|---|---|-----------|-----------|----------|
| 6 | 0 | -0.597905 | -2.453408 | 0.707783 |
|---|---|-----------|-----------|----------|

|    |   |           |           |           |
|----|---|-----------|-----------|-----------|
| 6  | 0 | -0.597905 | -2.453408 | -0.707783 |
| 6  | 0 | -1.522046 | -1.476828 | -1.144847 |
| 6  | 0 | -2.086336 | -0.868416 | 0.000000  |
| 6  | 0 | -1.522046 | -1.476828 | 1.144847  |
| 6  | 0 | 0.525786  | -2.802568 | 1.454478  |
| 6  | 0 | 1.607508  | -3.373102 | 0.697016  |
| 6  | 0 | 1.607508  | -3.373102 | -0.697016 |
| 1  | 0 | 2.497002  | -3.726245 | 1.214350  |
| 1  | 0 | 2.497002  | -3.726245 | -1.214350 |
| 6  | 0 | 0.525786  | -2.802568 | -1.454478 |
| 6  | 0 | 0.551473  | -2.287240 | -2.796679 |
| 6  | 0 | -0.358666 | -1.325285 | -3.226173 |
| 1  | 0 | 1.361255  | -2.570561 | -3.465372 |
| 1  | 0 | -0.225296 | -0.891987 | -4.214994 |
| 6  | 0 | -1.369801 | -0.797397 | -2.351061 |
| 6  | 0 | -2.030965 | 0.476854  | -2.421669 |
| 6  | 0 | -2.584222 | 1.077520  | -1.293511 |
| 1  | 0 | -2.010143 | 1.041632  | -3.351148 |
| 1  | 0 | -2.974694 | 2.088606  | -1.384039 |
| 6  | 0 | -2.525512 | 0.453406  | 0.000000  |
| 6  | 0 | -2.584222 | 1.077520  | 1.293511  |
| 6  | 0 | -2.030965 | 0.476854  | 2.421669  |
| 1  | 0 | -2.974694 | 2.088606  | 1.384039  |
| 1  | 0 | -2.010143 | 1.041632  | 3.351148  |
| 6  | 0 | -1.369801 | -0.797397 | 2.351061  |
| 6  | 0 | -0.358666 | -1.325285 | 3.226173  |
| 6  | 0 | 0.551473  | -2.287240 | 2.796679  |
| 1  | 0 | -0.225296 | -0.891987 | 4.214994  |
| 1  | 0 | 1.361255  | -2.570561 | 3.465372  |
| 53 | 0 | 1.223634  | 0.268411  | 0.000000  |
| 53 | 0 | 0.657892  | 2.866393  | 0.000000  |

Adduct  
Symmetry  
Energy  
Standard Orientation

C<sub>20</sub>H<sub>10</sub>-ClF (type: IA<sub>Cor</sub>a:cc)  
C<sub>1</sub>  
MP2 = -1325.548825 au

|   |   |           |           |           |
|---|---|-----------|-----------|-----------|
| 6 | 0 | 0.344580  | -1.145295 | -1.112144 |
| 6 | 0 | 1.174601  | -0.000177 | -1.097537 |
| 6 | 0 | 0.344937  | 1.145201  | -1.112131 |
| 6 | 0 | -0.998962 | 0.707323  | -1.119438 |
| 6 | 0 | -0.999182 | -0.706999 | -1.119445 |
| 6 | 0 | 0.743290  | -2.358801 | -0.561732 |
| 6 | 0 | 2.133827  | -2.428658 | -0.198096 |
| 6 | 0 | 2.954860  | -1.301816 | -0.196046 |
| 1 | 0 | 2.541042  | -3.361694 | 0.184993  |
| 1 | 0 | 3.968395  | -1.402868 | 0.185301  |
| 6 | 0 | 2.457007  | -0.000379 | -0.554806 |
| 6 | 0 | 2.955266  | 1.300901  | -0.196037 |
| 6 | 0 | 2.134584  | 2.428000  | -0.198078 |
| 1 | 0 | 3.968834  | 1.401635  | 0.185310  |
| 1 | 0 | 2.542092  | 3.360905  | 0.185018  |
| 6 | 0 | 0.744027  | 2.358577  | -0.561711 |

|    |   |           |           |           |
|----|---|-----------|-----------|-----------|
| 6  | 0 | -0.335252 | 3.230721  | -0.183748 |
| 6  | 0 | -1.659064 | 2.795692  | -0.174016 |
| 1  | 0 | -0.114941 | 4.222803  | 0.203906  |
| 1  | 0 | -2.418170 | 3.465707  | 0.223566  |
| 6  | 0 | -2.023269 | 1.454748  | -0.548051 |
| 6  | 0 | -3.184854 | 0.697087  | -0.165816 |
| 6  | 0 | -3.185072 | -0.696087 | -0.165822 |
| 1  | 0 | -4.055597 | 1.213189  | 0.232401  |
| 1  | 0 | -4.055974 | -1.211922 | 0.232392  |
| 6  | 0 | -2.023722 | -1.454108 | -0.548064 |
| 6  | 0 | -1.659936 | -2.795168 | -0.174039 |
| 6  | 0 | -0.336261 | -3.230611 | -0.183774 |
| 1  | 0 | -2.419251 | -3.464950 | 0.223539  |
| 1  | 0 | -0.116258 | -4.222764 | 0.203873  |
| 17 | 0 | 0.299535  | -0.000043 | 1.732302  |
| 9  | 0 | -0.268967 | -0.000022 | 3.279307  |

Adduct C<sub>20</sub>H<sub>10</sub>-BrF (type: IACora:cc)  
Symmetry C<sub>1</sub>  
Energy MP2 = -3438.588695 au  
Standard Orientation

|    |   |           |           |           |
|----|---|-----------|-----------|-----------|
| 6  | 0 | 0.280292  | -1.145334 | -1.321542 |
| 6  | 0 | 1.110233  | -0.000246 | -1.325519 |
| 6  | 0 | 0.280789  | 1.145204  | -1.321536 |
| 6  | 0 | -1.062711 | 0.707365  | -1.296292 |
| 6  | 0 | -1.063018 | -0.706911 | -1.296294 |
| 6  | 0 | 0.694968  | -2.361564 | -0.789316 |
| 6  | 0 | 2.096562  | -2.431407 | -0.469303 |
| 6  | 0 | 2.918083  | -1.304240 | -0.488275 |
| 1  | 0 | 2.516289  | -3.365579 | -0.102979 |
| 1  | 0 | 3.943108  | -1.408058 | -0.139973 |
| 6  | 0 | 2.410211  | -0.000528 | -0.825797 |
| 6  | 0 | 2.918651  | 1.302964  | -0.488278 |
| 6  | 0 | 2.097621  | 2.430490  | -0.469306 |
| 1  | 0 | 3.943721  | 1.406336  | -0.139978 |
| 1  | 0 | 2.517757  | 3.364480  | -0.102985 |
| 6  | 0 | 0.695996  | 2.361257  | -0.789314 |
| 6  | 0 | -0.373714 | 3.234004  | -0.386101 |
| 6  | 0 | -1.696855 | 2.797655  | -0.339170 |
| 1  | 0 | -0.144601 | 4.227726  | -0.008009 |
| 1  | 0 | -2.444775 | 3.468855  | 0.077114  |
| 6  | 0 | -2.071818 | 1.455815  | -0.700045 |
| 6  | 0 | -3.222834 | 0.697494  | -0.287843 |
| 6  | 0 | -3.223137 | -0.696100 | -0.287844 |
| 1  | 0 | -4.083184 | 1.213023  | 0.132986  |
| 1  | 0 | -4.083711 | -1.211253 | 0.132986  |
| 6  | 0 | -2.072451 | -1.454920 | -0.700046 |
| 6  | 0 | -1.698074 | -2.796922 | -0.339171 |
| 6  | 0 | -0.375122 | -3.233847 | -0.386102 |
| 1  | 0 | -2.446284 | -3.467799 | 0.077113  |
| 1  | 0 | -0.146440 | -4.227667 | -0.008009 |
| 35 | 0 | 0.306623  | -0.000037 | 1.605987  |

|   |   |           |           |          |
|---|---|-----------|-----------|----------|
| 9 | 0 | -0.240635 | -0.000015 | 3.301641 |
|---|---|-----------|-----------|----------|

Adduct C<sub>20</sub>H<sub>10</sub>-IF (type: IACora:cc)  
Symmetry C<sub>s</sub>  
Energy MP2 = -7783.976219 au  
Standard Orientation

|    |   |           |           |           |
|----|---|-----------|-----------|-----------|
| 6  | 0 | -1.522510 | -0.211189 | 1.144448  |
| 6  | 0 | -1.556276 | -1.040166 | 0.000000  |
| 6  | 0 | -1.522510 | -0.211189 | -1.144448 |
| 6  | 0 | -1.453247 | 1.130437  | -0.706858 |
| 6  | 0 | -1.453247 | 1.130437  | 0.706858  |
| 6  | 0 | -1.015588 | -0.644958 | 2.364504  |
| 6  | 0 | -0.753781 | -2.059129 | 2.433928  |
| 6  | 0 | -0.802596 | -2.879851 | 1.306011  |
| 1  | 0 | -0.409923 | -2.495022 | 3.369152  |
| 1  | 0 | -0.498384 | -3.918440 | 1.412881  |
| 6  | 0 | -1.114062 | -2.360109 | 0.000000  |
| 6  | 0 | -0.802596 | -2.879851 | -1.306011 |
| 6  | 0 | -0.753781 | -2.059129 | -2.433928 |
| 1  | 0 | -0.498384 | -3.918440 | -1.412881 |
| 1  | 0 | -0.409923 | -2.495022 | -3.369152 |
| 6  | 0 | -1.015588 | -0.644958 | -2.364504 |
| 6  | 0 | -0.584310 | 0.413103  | -3.238708 |
| 6  | 0 | -0.491686 | 1.734499  | -2.801690 |
| 1  | 0 | -0.221487 | 0.174193  | -4.235743 |
| 1  | 0 | -0.056932 | 2.468257  | -3.476729 |
| 6  | 0 | -0.831335 | 2.121831  | -1.457360 |
| 6  | 0 | -0.386277 | 3.259792  | -0.697200 |
| 6  | 0 | -0.386277 | 3.259792  | 0.697200  |
| 1  | 0 | 0.058078  | 4.109050  | -1.211313 |
| 1  | 0 | 0.058078  | 4.109050  | 1.211313  |
| 6  | 0 | -0.831335 | 2.121831  | 1.457360  |
| 6  | 0 | -0.491686 | 1.734499  | 2.801690  |
| 6  | 0 | -0.584310 | 0.413103  | 3.238708  |
| 1  | 0 | -0.056932 | 2.468257  | 3.476729  |
| 1  | 0 | -0.221487 | 0.174193  | 4.235743  |
| 53 | 0 | 1.538023  | -0.296477 | 0.000000  |
| 9  | 0 | 3.428896  | 0.118270  | 0.000000  |

Adduct C<sub>20</sub>H<sub>10</sub>-HF (type: IDCora:cc)  
Symmetry C<sub>5v</sub>  
Energy MP2 = -866.529965 au  
Standard Orientation

|   |   |           |           |           |
|---|---|-----------|-----------|-----------|
| 6 | 0 | -0.707284 | 0.973493  | -0.820520 |
| 6 | 0 | 0.707284  | 0.973493  | -0.820520 |
| 6 | 0 | -1.144410 | -0.371841 | -0.820520 |
| 6 | 0 | 1.144410  | -0.371841 | -0.820520 |
| 6 | 0 | 0.000000  | -1.203303 | -0.820520 |
| 6 | 0 | -1.457025 | 2.005423  | -0.265479 |
| 6 | 0 | 1.457025  | 2.005423  | -0.265479 |
| 6 | 0 | -2.357516 | -0.766003 | -0.265479 |



|   |   |           |           |           |
|---|---|-----------|-----------|-----------|
| 6 | 0 | 2.357516  | -0.766003 | -0.265479 |
| 6 | 0 | 0.000000  | -2.478839 | -0.265479 |
| 6 | 0 | -0.696845 | 3.170753  | 0.101924  |
| 6 | 0 | 0.696845  | 3.170753  | 0.101924  |
| 1 | 0 | -1.211442 | 4.046635  | 0.490124  |
| 1 | 0 | 1.211442  | 4.046635  | 0.490124  |
| 6 | 0 | -2.800228 | 1.642556  | 0.101924  |
| 6 | 0 | -3.230902 | 0.317078  | 0.101924  |
| 1 | 0 | -3.474222 | 2.402629  | 0.490124  |
| 1 | 0 | -4.222935 | 0.098329  | 0.490124  |
| 6 | 0 | 2.800228  | 1.642556  | 0.101924  |
| 6 | 0 | 3.230902  | 0.317078  | 0.101924  |
| 1 | 0 | 3.474222  | 2.402629  | 0.490124  |
| 1 | 0 | 4.222935  | 0.098329  | 0.490124  |
| 6 | 0 | -2.427481 | -2.155598 | 0.101924  |
| 6 | 0 | -1.299962 | -2.974788 | 0.101924  |
| 1 | 0 | -3.358629 | -2.561729 | 0.490124  |
| 1 | 0 | -1.398475 | -3.985864 | 0.490124  |
| 6 | 0 | 2.427481  | -2.155598 | 0.101924  |
| 1 | 0 | 3.358629  | -2.561729 | 0.490124  |
| 6 | 0 | 1.299962  | -2.974788 | 0.101924  |
| 1 | 0 | 1.398475  | -3.985864 | 0.490124  |
| 1 | 0 | 0.000000  | 0.000000  | 1.323893  |
| 9 | 0 | 0.000000  | 0.000000  | 2.248823  |

Adduct C<sub>20</sub>H<sub>10</sub>-HCl (type: ID<sub>Cora:cc</sub>)  
Symmetry C<sub>5v</sub>  
Energy MP2 = -1226.506152 au  
Standard Orientation

|   |   |           |           |           |
|---|---|-----------|-----------|-----------|
| 6 | 0 | -0.707529 | 0.973830  | -0.984795 |
| 6 | 0 | 0.707529  | 0.973830  | -0.984795 |
| 6 | 0 | -1.144806 | -0.371970 | -0.984795 |
| 6 | 0 | 1.144806  | -0.371970 | -0.984795 |
| 6 | 0 | 0.000000  | -1.203720 | -0.984795 |
| 6 | 0 | -1.455089 | 2.002759  | -0.418899 |
| 6 | 0 | 1.455089  | 2.002759  | -0.418899 |
| 6 | 0 | -2.354384 | -0.764986 | -0.418899 |
| 6 | 0 | 2.354384  | -0.764986 | -0.418899 |
| 6 | 0 | 0.000000  | -2.475546 | -0.418899 |
| 6 | 0 | -0.696622 | 3.165498  | -0.043202 |
| 6 | 0 | 0.696622  | 3.165498  | -0.043202 |
| 1 | 0 | -1.212423 | 4.037030  | 0.353315  |
| 1 | 0 | 1.212423  | 4.037030  | 0.353315  |
| 6 | 0 | -2.795300 | 1.640720  | -0.043202 |
| 6 | 0 | -3.225836 | 0.315666  | -0.043202 |
| 1 | 0 | -3.464784 | 2.400594  | 0.353315  |
| 1 | 0 | -4.214103 | 0.094428  | 0.353315  |
| 6 | 0 | 2.795300  | 1.640720  | -0.043202 |
| 6 | 0 | 3.225836  | 0.315666  | -0.043202 |
| 1 | 0 | 3.464784  | 2.400594  | 0.353315  |
| 1 | 0 | 4.214103  | 0.094428  | 0.353315  |
| 6 | 0 | -2.424212 | -2.151478 | -0.043202 |

|    |   |           |           |           |
|----|---|-----------|-----------|-----------|
| 6  | 0 | -1.297054 | -2.970406 | -0.043202 |
| 1  | 0 | -3.353778 | -2.553382 | 0.353315  |
| 1  | 0 | -1.392036 | -3.978670 | 0.353315  |
| 6  | 0 | 2.424212  | -2.151478 | -0.043202 |
| 1  | 0 | 3.353778  | -2.553382 | 0.353315  |
| 6  | 0 | 1.297054  | -2.970406 | -0.043202 |
| 1  | 0 | 1.392036  | -3.978670 | 0.353315  |
| 1  | 0 | 0.000000  | 0.000000  | 1.075066  |
| 17 | 0 | 0.000000  | 0.000000  | 2.358513  |

Adduct C<sub>20</sub>H<sub>10</sub>-HBr (type: ID<sub>Cora:cc</sub>)  
Symmetry C<sub>5v</sub>  
Energy MP2 = -3339.520974 au  
Standard Orientation

|    |   |           |           |           |
|----|---|-----------|-----------|-----------|
| 6  | 0 | -0.707532 | 0.973835  | -1.269030 |
| 6  | 0 | 0.707532  | 0.973835  | -1.269030 |
| 6  | 0 | -1.144811 | -0.371972 | -1.269030 |
| 6  | 0 | 1.144811  | -0.371972 | -1.269030 |
| 6  | 0 | 0.000000  | -1.203726 | -1.269030 |
| 6  | 0 | -1.454930 | 2.002540  | -0.702220 |
| 6  | 0 | 1.454930  | 2.002540  | -0.702220 |
| 6  | 0 | -2.354127 | -0.764902 | -0.702220 |
| 6  | 0 | 2.354127  | -0.764902 | -0.702220 |
| 6  | 0 | 0.000000  | -2.475275 | -0.702220 |
| 6  | 0 | -0.696643 | 3.165150  | -0.326078 |
| 6  | 0 | 0.696643  | 3.165150  | -0.326078 |
| 1  | 0 | -1.212520 | 4.036413  | 0.070986  |
| 1  | 0 | 1.212520  | 4.036413  | 0.070986  |
| 6  | 0 | -2.794962 | 1.640632  | -0.326078 |
| 6  | 0 | -3.225511 | 0.315538  | -0.326078 |
| 1  | 0 | -3.464168 | 2.400495  | 0.070986  |
| 1  | 0 | -4.213546 | 0.094145  | 0.070986  |
| 6  | 0 | 2.794962  | 1.640632  | -0.326078 |
| 6  | 0 | 3.225511  | 0.315538  | -0.326078 |
| 1  | 0 | 3.464168  | 2.400495  | 0.070986  |
| 1  | 0 | 4.213546  | 0.094145  | 0.070986  |
| 6  | 0 | -2.424024 | -2.151184 | -0.326078 |
| 6  | 0 | -1.296832 | -2.970137 | -0.326078 |
| 1  | 0 | -3.353493 | -2.552825 | 0.070986  |
| 1  | 0 | -1.391595 | -3.978228 | 0.070986  |
| 6  | 0 | 2.424024  | -2.151184 | -0.326078 |
| 1  | 0 | 3.353493  | -2.552825 | 0.070986  |
| 6  | 0 | 1.296832  | -2.970137 | -0.326078 |
| 1  | 0 | 1.391595  | -3.978228 | 0.070986  |
| 1  | 0 | 0.000000  | 0.000000  | 0.784324  |
| 35 | 0 | 0.000000  | 0.000000  | 2.205943  |

Adduct C<sub>20</sub>H<sub>10</sub>-HI (type: ID<sub>Cora:cc</sub>)  
Symmetry C<sub>5v</sub>  
Energy MP2 = -7684.855427 au  
Standard Orientation

|    |   |           |           |           |
|----|---|-----------|-----------|-----------|
| 6  | 0 | -0.707617 | 0.973951  | -1.543018 |
| 6  | 0 | 0.707617  | 0.973951  | -1.543018 |
| 6  | 0 | -1.144948 | -0.372016 | -1.543018 |
| 6  | 0 | 1.144948  | -0.372016 | -1.543018 |
| 6  | 0 | 0.000000  | -1.203870 | -1.543018 |
| 6  | 0 | -1.453944 | 2.001183  | -0.971365 |
| 6  | 0 | 1.453944  | 2.001183  | -0.971365 |
| 6  | 0 | -2.352531 | -0.764384 | -0.971365 |
| 6  | 0 | 2.352531  | -0.764384 | -0.971365 |
| 6  | 0 | 0.000000  | -2.473598 | -0.971365 |
| 6  | 0 | -0.696551 | 3.163213  | -0.592329 |
| 6  | 0 | 0.696551  | 3.163213  | -0.592329 |
| 1  | 0 | -1.212861 | 4.032833  | -0.192218 |
| 1  | 0 | 1.212861  | 4.032833  | -0.192218 |
| 6  | 0 | -2.793148 | 1.639946  | -0.592329 |
| 6  | 0 | -3.223640 | 0.315027  | -0.592329 |
| 1  | 0 | -3.460657 | 2.399713  | -0.192218 |
| 1  | 0 | -4.210247 | 0.092715  | -0.192218 |
| 6  | 0 | 2.793148  | 1.639946  | -0.592329 |
| 6  | 0 | 3.223640  | 0.315027  | -0.592329 |
| 1  | 0 | 3.460657  | 2.399713  | -0.192218 |
| 1  | 0 | 4.210247  | 0.092715  | -0.192218 |
| 6  | 0 | -2.422812 | -2.149671 | -0.592329 |
| 6  | 0 | -1.295768 | -2.968516 | -0.592329 |
| 1  | 0 | -3.351665 | -2.549729 | -0.192218 |
| 1  | 0 | -1.389215 | -3.975532 | -0.192218 |
| 6  | 0 | 2.422812  | -2.149671 | -0.592329 |
| 1  | 0 | 3.351665  | -2.549729 | -0.192218 |
| 6  | 0 | 1.295768  | -2.968516 | -0.592329 |
| 1  | 0 | 1.389215  | -3.975532 | -0.192218 |
| 1  | 0 | 0.000000  | 0.000000  | 0.508387  |
| 53 | 0 | 0.000000  | 0.000000  | 2.120473  |

Adduct C<sub>20</sub>H<sub>10</sub>-F<sub>2</sub> (type: ID<sub>Cora:cc</sub>)  
Symmetry C<sub>5v</sub>  
Energy MP2 = -965.470023 au  
Standard Orientation

|   |   |           |           |           |
|---|---|-----------|-----------|-----------|
| 6 | 0 | -0.707024 | 0.973136  | -0.988404 |
| 6 | 0 | 0.707024  | 0.973136  | -0.988404 |
| 6 | 0 | -1.143990 | -0.371705 | -0.988404 |
| 6 | 0 | 1.143990  | -0.371705 | -0.988404 |
| 6 | 0 | 0.000000  | -1.202862 | -0.988404 |
| 6 | 0 | -1.454760 | 2.002306  | -0.427078 |
| 6 | 0 | 1.454760  | 2.002306  | -0.427078 |
| 6 | 0 | -2.353852 | -0.764813 | -0.427078 |
| 6 | 0 | 2.353852  | -0.764813 | -0.427078 |
| 6 | 0 | 0.000000  | -2.474986 | -0.427078 |
| 6 | 0 | -0.696475 | 3.166374  | -0.052989 |
| 6 | 0 | 0.696475  | 3.166374  | -0.052989 |
| 1 | 0 | -1.212526 | 4.040978  | 0.336929  |
| 1 | 0 | 1.212526  | 4.040978  | 0.336929  |
| 6 | 0 | -2.796178 | 1.640850  | -0.052989 |

|   |   |           |           |           |
|---|---|-----------|-----------|-----------|
| 6 | 0 | -3.226623 | 0.316076  | -0.052989 |
| 1 | 0 | -3.468507 | 2.401912  | 0.336929  |
| 1 | 0 | -4.217890 | 0.095550  | 0.336929  |
| 6 | 0 | 2.796178  | 1.640850  | -0.052989 |
| 6 | 0 | 3.226623  | 0.316076  | -0.052989 |
| 1 | 0 | 3.468507  | 2.401912  | 0.336929  |
| 1 | 0 | 4.217890  | 0.095550  | 0.336929  |
| 6 | 0 | -2.424608 | -2.152273 | -0.052989 |
| 6 | 0 | -1.297688 | -2.971028 | -0.052989 |
| 1 | 0 | -3.356181 | -2.556515 | 0.336929  |
| 1 | 0 | -1.394273 | -3.981925 | 0.336929  |
| 6 | 0 | 2.424608  | -2.152273 | -0.052989 |
| 1 | 0 | 3.356181  | -2.556515 | 0.336929  |
| 6 | 0 | 1.297688  | -2.971028 | -0.052989 |
| 1 | 0 | 1.394273  | -3.981925 | 0.336929  |
| 9 | 0 | 0.000000  | 0.000000  | 1.646669  |
| 9 | 0 | 0.000000  | 0.000000  | 3.050497  |

Adduct  
Symmetry  
Energy  
Standard Orientation

C<sub>20</sub>H<sub>10</sub>-Cl<sub>2</sub> (type: ID<sub>Cora:cc</sub>)  
C<sub>5v</sub>  
MP2 = -1685.572025 au

|   |   |           |           |           |
|---|---|-----------|-----------|-----------|
| 6 | 0 | -0.707420 | 0.973681  | -1.328590 |
| 6 | 0 | 0.707420  | 0.973681  | -1.328590 |
| 6 | 0 | -1.144630 | -0.371913 | -1.328590 |
| 6 | 0 | 1.144630  | -0.371913 | -1.328590 |
| 6 | 0 | 0.000000  | -1.203536 | -1.328590 |
| 6 | 0 | -1.454307 | 2.001682  | -0.761185 |
| 6 | 0 | 1.454307  | 2.001682  | -0.761185 |
| 6 | 0 | -2.353118 | -0.764574 | -0.761185 |
| 6 | 0 | 2.353118  | -0.764574 | -0.761185 |
| 6 | 0 | 0.000000  | -2.474215 | -0.761185 |
| 6 | 0 | -0.696523 | 3.163037  | -0.380816 |
| 6 | 0 | 0.696523  | 3.163037  | -0.380816 |
| 1 | 0 | -1.212955 | 4.033855  | 0.016969  |
| 1 | 0 | 1.212955  | 4.033855  | 0.016969  |
| 6 | 0 | -2.792990 | 1.639865  | -0.380816 |
| 6 | 0 | -3.223464 | 0.314999  | -0.380816 |
| 1 | 0 | -3.461600 | 2.400119  | 0.016969  |
| 1 | 0 | -4.211248 | 0.092941  | 0.016969  |
| 6 | 0 | 2.792990  | 1.639865  | -0.380816 |
| 6 | 0 | 3.223464  | 0.314999  | -0.380816 |
| 1 | 0 | 3.461600  | 2.400119  | 0.016969  |
| 1 | 0 | 4.211248  | 0.092941  | 0.016969  |
| 6 | 0 | -2.422685 | -2.149545 | -0.380816 |
| 6 | 0 | -1.295688 | -2.968357 | -0.380816 |
| 1 | 0 | -3.352342 | -2.550500 | 0.016969  |
| 1 | 0 | -1.389739 | -3.976414 | 0.016969  |
| 6 | 0 | 2.422685  | -2.149545 | -0.380816 |
| 1 | 0 | 3.352342  | -2.550500 | 0.016969  |
| 6 | 0 | 1.295688  | -2.968357 | -0.380816 |
| 1 | 0 | 1.389739  | -3.976414 | 0.016969  |

|    |   |          |          |          |
|----|---|----------|----------|----------|
| 17 | 0 | 0.000000 | 0.000000 | 1.515252 |
| 17 | 0 | 0.000000 | 0.000000 | 3.506661 |

Adduct C<sub>20</sub>H<sub>10</sub>-Br<sub>2</sub> (type: ID<sub>Cora:cc</sub>)  
Symmetry C<sub>5v</sub>  
Energy MP2 = -5911.634686 au  
Standard Orientation

|    |   |           |           |           |
|----|---|-----------|-----------|-----------|
| 6  | 0 | -0.707305 | 0.973522  | -1.862987 |
| 6  | 0 | 0.707305  | 0.973522  | -1.862987 |
| 6  | 0 | -1.144444 | -0.371852 | -1.862987 |
| 6  | 0 | 1.144444  | -0.371852 | -1.862987 |
| 6  | 0 | 0.000000  | -1.203339 | -1.862987 |
| 6  | 0 | -1.455702 | 2.003601  | -1.301661 |
| 6  | 0 | 1.455702  | 2.003601  | -1.301661 |
| 6  | 0 | -2.355375 | -0.765308 | -1.301661 |
| 6  | 0 | 2.355375  | -0.765308 | -1.301661 |
| 6  | 0 | 0.000000  | -2.476587 | -1.301661 |
| 6  | 0 | -0.696831 | 3.166213  | -0.926157 |
| 6  | 0 | 0.696831  | 3.166213  | -0.926157 |
| 1  | 0 | -1.212463 | 4.039328  | -0.532433 |
| 1  | 0 | 1.212463  | 4.039328  | -0.532433 |
| 6  | 0 | -2.795915 | 1.641139  | -0.926157 |
| 6  | 0 | -3.226580 | 0.315688  | -0.926157 |
| 1  | 0 | -3.466958 | 2.401342  | -0.532433 |
| 1  | 0 | -4.216301 | 0.095100  | -0.532433 |
| 6  | 0 | 2.795915  | 1.641139  | -0.926157 |
| 6  | 0 | 3.226580  | 0.315688  | -0.926157 |
| 1  | 0 | 3.466958  | 2.401342  | -0.532433 |
| 1  | 0 | 4.216301  | 0.095100  | -0.532433 |
| 6  | 0 | -2.424801 | -2.151933 | -0.926157 |
| 6  | 0 | -1.297305 | -2.971107 | -0.926157 |
| 1  | 0 | -3.355161 | -2.555217 | -0.532433 |
| 1  | 0 | -1.393354 | -3.980553 | -0.532433 |
| 6  | 0 | 2.424801  | -2.151933 | -0.926157 |
| 1  | 0 | 3.355161  | -2.555217 | -0.532433 |
| 6  | 0 | 1.297305  | -2.971107 | -0.926157 |
| 1  | 0 | 1.393354  | -3.980553 | -0.532433 |
| 35 | 0 | 0.000000  | 0.000000  | 1.087159  |
| 35 | 0 | 0.000000  | 0.000000  | 3.365218  |

Adduct C<sub>20</sub>H<sub>10</sub>-I<sub>2</sub> (type: ID<sub>Cora:cc</sub>)  
Symmetry C<sub>5v</sub>  
Energy MP2 = -14602.372629 au  
Standard Orientation

|   |   |           |           |           |
|---|---|-----------|-----------|-----------|
| 6 | 0 | -2.067925 | 1.266707  | 1.039695  |
| 6 | 0 | -1.921953 | 0.087200  | 1.805636  |
| 6 | 0 | -0.949872 | 2.094028  | 1.294070  |
| 6 | 0 | -0.713684 | 0.185545  | 2.533388  |
| 6 | 0 | -0.112905 | 1.425833  | 2.217223  |
| 6 | 0 | -2.767088 | 1.298868  | -0.162697 |
| 6 | 0 | -2.466186 | -1.132536 | 1.416191  |

|    |   |           |           |           |
|----|---|-----------|-----------|-----------|
| 6  | 0 | -0.462364 | 3.004284  | 0.361665  |
| 6  | 0 | 0.024507  | -0.929809 | 2.916360  |
| 6  | 0 | 1.262937  | 1.626886  | 2.264627  |
| 6  | 0 | -3.515711 | 0.105433  | -0.454650 |
| 6  | 0 | -3.371755 | -1.057773 | 0.300704  |
| 1  | 0 | -4.137342 | 0.066339  | -1.346380 |
| 1  | 0 | -3.887130 | -1.955464 | -0.033475 |
| 6  | 0 | -2.411250 | 2.385554  | -1.035881 |
| 6  | 0 | -1.308649 | 3.201441  | -0.785021 |
| 1  | 0 | -2.948729 | 2.520192  | -1.971896 |
| 1  | 0 | -1.032265 | 3.938309  | -1.535870 |
| 6  | 0 | -1.833092 | -2.286169 | 1.997811  |
| 6  | 0 | -0.641521 | -2.189183 | 2.715506  |
| 1  | 0 | -2.231229 | -3.277456 | 1.792941  |
| 1  | 0 | -0.160126 | -3.108881 | 3.040387  |
| 6  | 0 | 0.912609  | 3.382237  | 0.552865  |
| 6  | 0 | 1.738010  | 2.723277  | 1.463260  |
| 1  | 0 | 1.358240  | 4.132880  | -0.096045 |
| 1  | 0 | 2.792892  | 2.987522  | 1.486339  |
| 6  | 0 | 1.413886  | -0.668253 | 3.183145  |
| 1  | 0 | 2.051891  | -1.472066 | 3.543657  |
| 6  | 0 | 2.006361  | 0.554894  | 2.871349  |
| 1  | 0 | 3.081692  | 0.653922  | 3.001717  |
| 53 | 0 | 0.366642  | -0.321687 | -0.565255 |
| 53 | 0 | 1.675357  | -1.469937 | -2.582912 |

Adduct C<sub>20</sub>H<sub>10</sub>-ClF (type: ID<sub>Cora:cc</sub>)  
Symmetry C<sub>5v</sub>  
Energy MP2 = -1325.548534 au  
Standard Orientation

|   |   |           |           |           |
|---|---|-----------|-----------|-----------|
| 6 | 0 | -0.707332 | 0.973559  | -1.121837 |
| 6 | 0 | 0.707332  | 0.973559  | -1.121837 |
| 6 | 0 | -1.144487 | -0.371866 | -1.121837 |
| 6 | 0 | 1.144487  | -0.371866 | -1.121837 |
| 6 | 0 | 0.000000  | -1.203385 | -1.121837 |
| 6 | 0 | -1.456103 | 2.004154  | -0.563193 |
| 6 | 0 | 1.456103  | 2.004154  | -0.563193 |
| 6 | 0 | -2.356024 | -0.765519 | -0.563193 |
| 6 | 0 | 2.356024  | -0.765519 | -0.563193 |
| 6 | 0 | 0.000000  | -2.477271 | -0.563193 |
| 6 | 0 | -0.696812 | 3.167114  | -0.188912 |
| 6 | 0 | 0.696812  | 3.167114  | -0.188912 |
| 1 | 0 | -1.212182 | 4.041095  | 0.203104  |
| 1 | 0 | 1.212182  | 4.041095  | 0.203104  |
| 6 | 0 | -2.796778 | 1.641400  | -0.188912 |
| 6 | 0 | -3.227431 | 0.315984  | -0.188912 |
| 1 | 0 | -3.468725 | 2.401621  | 0.203104  |
| 1 | 0 | -4.217895 | 0.095913  | 0.203104  |
| 6 | 0 | 2.796778  | 1.641400  | -0.188912 |
| 6 | 0 | 3.227431  | 0.315984  | -0.188912 |
| 1 | 0 | 3.468725  | 2.401621  | 0.203104  |
| 1 | 0 | 4.217895  | 0.095913  | 0.203104  |

|    |   |           |           |           |
|----|---|-----------|-----------|-----------|
| 6  | 0 | -2.425316 | -2.152673 | -0.188912 |
| 6  | 0 | -1.297850 | -2.971825 | -0.188912 |
| 1  | 0 | -3.355972 | -2.556812 | 0.203104  |
| 1  | 0 | -1.394620 | -3.981817 | 0.203104  |
| 6  | 0 | 2.425316  | -2.152673 | -0.188912 |
| 1  | 0 | 3.355972  | -2.556812 | 0.203104  |
| 6  | 0 | 1.297850  | -2.971825 | -0.188912 |
| 1  | 0 | 1.394620  | -3.981817 | 0.203104  |
| 17 | 0 | 0.000000  | 0.000000  | 1.732286  |
| 9  | 0 | 0.000000  | 0.000000  | 3.378414  |

Adduct C<sub>20</sub>H<sub>10</sub>-BrF (type: ID<sub>Cora:cc</sub>)  
Symmetry C<sub>5v</sub>  
Energy MP2 = -3438.588416 au  
Standard Orientation

|    |   |           |           |           |
|----|---|-----------|-----------|-----------|
| 6  | 0 | -0.707274 | 0.973479  | -1.322304 |
| 6  | 0 | 0.707274  | 0.973479  | -1.322304 |
| 6  | 0 | -1.144393 | -0.371836 | -1.322304 |
| 6  | 0 | 1.144393  | -0.371836 | -1.322304 |
| 6  | 0 | 0.000000  | -1.203286 | -1.322304 |
| 6  | 0 | -1.457661 | 2.006298  | -0.770252 |
| 6  | 0 | 1.457661  | 2.006298  | -0.770252 |
| 6  | 0 | -2.358544 | -0.766337 | -0.770252 |
| 6  | 0 | 2.358544  | -0.766337 | -0.770252 |
| 6  | 0 | 0.000000  | -2.479920 | -0.770252 |
| 6  | 0 | -0.697138 | 3.170282  | -0.400654 |
| 6  | 0 | 0.697138  | 3.170282  | -0.400654 |
| 1  | 0 | -1.211595 | 4.046406  | -0.012360 |
| 1  | 0 | 1.211595  | 4.046406  | -0.012360 |
| 6  | 0 | -2.799690 | 1.642689  | -0.400654 |
| 6  | 0 | -3.230545 | 0.316653  | -0.400654 |
| 1  | 0 | -3.473957 | 2.402704  | -0.012360 |
| 1  | 0 | -4.222764 | 0.098113  | -0.012360 |
| 6  | 0 | 2.799690  | 1.642689  | -0.400654 |
| 6  | 0 | 3.230545  | 0.316653  | -0.400654 |
| 1  | 0 | 3.473957  | 2.402704  | -0.012360 |
| 1  | 0 | 4.222764  | 0.098113  | -0.012360 |
| 6  | 0 | -2.427441 | -2.155045 | -0.400654 |
| 6  | 0 | -1.299448 | -2.974579 | -0.400654 |
| 1  | 0 | -3.358619 | -2.561453 | -0.012360 |
| 1  | 0 | -1.398217 | -3.985769 | -0.012360 |
| 6  | 0 | 2.427441  | -2.155045 | -0.400654 |
| 1  | 0 | 3.358619  | -2.561453 | -0.012360 |
| 6  | 0 | 1.299448  | -2.974579 | -0.400654 |
| 1  | 0 | 1.398217  | -3.985769 | -0.012360 |
| 35 | 0 | 0.000000  | 0.000000  | 1.611860  |
| 9  | 0 | 0.000000  | 0.000000  | 3.391606  |

Adduct C<sub>20</sub>H<sub>10</sub>-IF (type: ID<sub>Cora:cc</sub>)  
Symmetry C<sub>5v</sub>  
Energy MP2 = -7783.968546 au

## Standard Orientation

|    |   |           |           |           |
|----|---|-----------|-----------|-----------|
| 6  | 0 | 0.000000  | 1.201743  | -0.663476 |
| 6  | 0 | -1.142925 | 0.371359  | -0.663476 |
| 6  | 0 | 1.142925  | 0.371359  | -0.663476 |
| 6  | 0 | -0.706367 | -0.972230 | -0.663476 |
| 6  | 0 | 0.706367  | -0.972230 | -0.663476 |
| 6  | 0 | 0.000000  | 2.483952  | -1.196974 |
| 6  | 0 | -2.362379 | 0.767583  | -1.196974 |
| 6  | 0 | 2.362379  | 0.767583  | -1.196974 |
| 6  | 0 | -1.460030 | -2.009559 | -1.196974 |
| 6  | 0 | 1.460030  | -2.009559 | -1.196974 |
| 6  | 0 | -1.304088 | 2.981715  | -1.549972 |
| 6  | 0 | -2.432794 | 2.161662  | -1.549972 |
| 1  | 0 | -1.409265 | 3.999344  | -1.919192 |
| 1  | 0 | -3.368115 | 2.576156  | -1.919192 |
| 6  | 0 | 1.304088  | 2.981715  | -1.549972 |
| 6  | 0 | 2.432794  | 2.161662  | -1.549972 |
| 1  | 0 | 1.409265  | 3.999344  | -1.919192 |
| 1  | 0 | 3.368115  | 2.576156  | -1.919192 |
| 6  | 0 | -3.238765 | -0.318861 | -1.549972 |
| 6  | 0 | -2.807637 | -1.645734 | -1.549972 |
| 1  | 0 | -4.239089 | -0.104425 | -1.919192 |
| 1  | 0 | -3.490875 | -2.407192 | -1.919192 |
| 6  | 0 | 3.238765  | -0.318861 | -1.549972 |
| 6  | 0 | 2.807637  | -1.645734 | -1.549972 |
| 1  | 0 | 4.239089  | -0.104425 | -1.919192 |
| 1  | 0 | 3.490875  | -2.407192 | -1.919192 |
| 6  | 0 | -0.697579 | -3.178782 | -1.549972 |
| 1  | 0 | -1.210636 | -4.063882 | -1.919192 |
| 6  | 0 | 0.697579  | -3.178782 | -1.549972 |
| 1  | 0 | 1.210636  | -4.063882 | -1.919192 |
| 53 | 0 | 0.000000  | 0.000000  | 2.429003  |
| 9  | 0 | 0.000000  | 0.000000  | 4.362953  |

Adduct  
Symmetry  
Energy  
Standard Orientation

C<sub>24</sub>H<sub>12</sub>C<sub>i</sub> (very close to *D*<sub>6h</sub>)

MP2 = -919.548821 au

|   |   |           |           |           |
|---|---|-----------|-----------|-----------|
| 6 | 0 | -1.420922 | -0.003329 | 0.000107  |
| 6 | 0 | -0.713344 | 1.228890  | 0.000073  |
| 6 | 0 | 0.707578  | 1.232219  | -0.000013 |
| 6 | 0 | 1.420922  | 0.003329  | -0.000107 |
| 6 | 0 | 0.713344  | -1.228890 | -0.000073 |
| 6 | 0 | -0.707578 | -1.232219 | 0.000013  |
| 6 | 0 | -2.844177 | -0.006664 | 0.000208  |
| 6 | 0 | -3.531714 | 1.234632  | 0.000284  |
| 6 | 0 | -2.846488 | 2.427926  | 0.000253  |
| 1 | 0 | -4.619189 | 1.230097  | 0.000387  |
| 1 | 0 | -3.390716 | 3.369435  | 0.000288  |
| 6 | 0 | -1.427859 | 2.459797  | 0.000152  |
| 6 | 0 | -0.696634 | 3.675870  | 0.000132  |
| 6 | 0 | 0.679402  | 3.679094  | 0.000047  |



|   |   |           |           |           |
|---|---|-----------|-----------|-----------|
| 1 | 0 | -1.244299 | 4.615384  | 0.000167  |
| 1 | 0 | 1.222658  | 4.621164  | 0.000057  |
| 6 | 0 | 1.416317  | 2.466461  | -0.000033 |
| 6 | 0 | 2.835079  | 2.441238  | -0.000135 |
| 6 | 0 | 3.525890  | 1.251168  | -0.000224 |
| 1 | 0 | 3.374890  | 3.385287  | -0.000124 |
| 1 | 0 | 4.613374  | 1.251729  | -0.000326 |
| 6 | 0 | 2.844177  | 0.006664  | -0.000208 |
| 6 | 0 | 3.531714  | -1.234632 | -0.000284 |
| 6 | 0 | 2.846488  | -2.427926 | -0.000253 |
| 1 | 0 | 4.619189  | -1.230097 | -0.000387 |
| 1 | 0 | 3.390716  | -3.369435 | -0.000288 |
| 6 | 0 | 1.427859  | -2.459797 | -0.000152 |
| 6 | 0 | 0.696634  | -3.675870 | -0.000132 |
| 6 | 0 | -0.679402 | -3.679094 | -0.000047 |
| 1 | 0 | 1.244299  | -4.615384 | -0.000167 |
| 1 | 0 | -1.222658 | -4.621164 | -0.000057 |
| 6 | 0 | -1.416317 | -2.466461 | 0.000033  |
| 6 | 0 | -2.835079 | -2.441238 | 0.000135  |
| 6 | 0 | -3.525890 | -1.251168 | 0.000224  |
| 1 | 0 | -3.374890 | -3.385287 | 0.000124  |
| 1 | 0 | -4.613374 | -1.251729 | 0.000326  |

Adduct C<sub>24</sub>H<sub>12</sub>-HF (type: ID<sub>Cor</sub>)  
Symmetry C<sub>6v</sub>  
Energy MP2 = -1019.883059 au  
Standard Orientation

|   |   |           |           |           |
|---|---|-----------|-----------|-----------|
| 6 | 0 | 0.711034  | 1.231548  | -0.192526 |
| 6 | 0 | -0.711034 | 1.231548  | -0.192526 |
| 6 | 0 | -1.422069 | 0.000000  | -0.192526 |
| 6 | 0 | -0.711034 | -1.231548 | -0.192526 |
| 6 | 0 | 0.711034  | -1.231548 | -0.192526 |
| 6 | 0 | 1.422069  | 0.000000  | -0.192526 |
| 6 | 0 | 1.422758  | 2.464289  | -0.184424 |
| 6 | 0 | 0.688055  | 3.677810  | -0.180389 |
| 6 | 0 | -0.688055 | 3.677810  | -0.180389 |
| 1 | 0 | 1.233158  | 4.618630  | -0.174371 |
| 1 | 0 | -1.233158 | 4.618630  | -0.174371 |
| 6 | 0 | -1.422758 | 2.464289  | -0.184424 |
| 6 | 0 | -2.841049 | 2.434778  | -0.180389 |
| 6 | 0 | -3.529104 | 1.243032  | -0.180389 |
| 1 | 0 | -3.383272 | 3.377261  | -0.174371 |
| 1 | 0 | -4.616430 | 1.241369  | -0.174371 |
| 6 | 0 | -2.845516 | 0.000000  | -0.184424 |
| 6 | 0 | -3.529104 | -1.243032 | -0.180389 |
| 6 | 0 | -2.841049 | -2.434778 | -0.180389 |
| 1 | 0 | -4.616430 | -1.241369 | -0.174371 |
| 1 | 0 | -3.383272 | -3.377261 | -0.174371 |
| 6 | 0 | -1.422758 | -2.464289 | -0.184424 |
| 6 | 0 | -0.688055 | -3.677810 | -0.180389 |
| 6 | 0 | 0.688055  | -3.677810 | -0.180389 |
| 1 | 0 | -1.233158 | -4.618630 | -0.174371 |

|   |   |          |           |           |
|---|---|----------|-----------|-----------|
| 1 | 0 | 1.233158 | -4.618630 | -0.174371 |
| 6 | 0 | 1.422758 | -2.464289 | -0.184424 |
| 6 | 0 | 2.841049 | -2.434778 | -0.180389 |
| 6 | 0 | 3.529104 | -1.243032 | -0.180389 |
| 1 | 0 | 3.383272 | -3.377261 | -0.174371 |
| 1 | 0 | 4.616430 | -1.241369 | -0.174371 |
| 6 | 0 | 2.845516 | 0.000000  | -0.184424 |
| 6 | 0 | 3.529104 | 1.243032  | -0.180389 |
| 6 | 0 | 2.841049 | 2.434778  | -0.180389 |
| 1 | 0 | 4.616430 | 1.241369  | -0.174371 |
| 1 | 0 | 3.383272 | 3.377261  | -0.174371 |
| 1 | 0 | 0.000000 | 0.000000  | 2.033581  |
| 9 | 0 | 0.000000 | 0.000000  | 2.957455  |

Adduct            C<sub>24</sub>H<sub>12</sub>-HCl (type: ID<sub>Cor</sub>)  
Symmetry        C<sub>6v</sub>  
Energy            MP2 = -1379.856280 au  
Standard Orientation

|   |   |           |           |           |
|---|---|-----------|-----------|-----------|
| 6 | 0 | 0.710861  | 1.231247  | -0.366302 |
| 6 | 0 | -0.710861 | 1.231247  | -0.366302 |
| 6 | 0 | -1.421722 | 0.000000  | -0.366302 |
| 6 | 0 | -0.710861 | -1.231247 | -0.366302 |
| 6 | 0 | 0.710861  | -1.231247 | -0.366302 |
| 6 | 0 | 1.421722  | 0.000000  | -0.366302 |
| 6 | 0 | 1.422568  | 2.463960  | -0.349562 |
| 6 | 0 | 0.688091  | 3.677565  | -0.339642 |
| 6 | 0 | -0.688091 | 3.677565  | -0.339642 |
| 1 | 0 | 1.233292  | 4.618322  | -0.327744 |
| 1 | 0 | -1.233292 | 4.618322  | -0.327744 |
| 6 | 0 | -1.422568 | 2.463960  | -0.349562 |
| 6 | 0 | -2.840819 | 2.434687  | -0.339642 |
| 6 | 0 | -3.528910 | 1.242878  | -0.339642 |
| 1 | 0 | -3.382938 | 3.377223  | -0.327744 |
| 1 | 0 | -4.616230 | 1.241099  | -0.327744 |
| 6 | 0 | -2.845136 | 0.000000  | -0.349562 |
| 6 | 0 | -3.528910 | -1.242878 | -0.339642 |
| 6 | 0 | -2.840819 | -2.434687 | -0.339642 |
| 1 | 0 | -4.616230 | -1.241099 | -0.327744 |
| 1 | 0 | -3.382938 | -3.377223 | -0.327744 |
| 6 | 0 | -1.422568 | -2.463960 | -0.349562 |
| 6 | 0 | -0.688091 | -3.677565 | -0.339642 |
| 6 | 0 | 0.688091  | -3.677565 | -0.339642 |
| 1 | 0 | -1.233292 | -4.618322 | -0.327744 |
| 1 | 0 | 1.233292  | -4.618322 | -0.327744 |
| 6 | 0 | 1.422568  | -2.463960 | -0.349562 |
| 6 | 0 | 2.840819  | -2.434687 | -0.339642 |
| 6 | 0 | 3.528910  | -1.242878 | -0.339642 |
| 1 | 0 | 3.382938  | -3.377223 | -0.327744 |
| 1 | 0 | 4.616230  | -1.241099 | -0.327744 |
| 6 | 0 | 2.845136  | 0.000000  | -0.349562 |
| 6 | 0 | 3.528910  | 1.242878  | -0.339642 |
| 6 | 0 | 2.840819  | 2.434687  | -0.339642 |

|    |   |          |          |           |
|----|---|----------|----------|-----------|
| 1  | 0 | 4.616230 | 1.241099 | -0.327744 |
| 1  | 0 | 3.382938 | 3.377223 | -0.327744 |
| 1  | 0 | 0.000000 | 0.000000 | 1.798517  |
| 17 | 0 | 0.000000 | 0.000000 | 3.079984  |

Adduct C<sub>24</sub>H<sub>12</sub>-HBr (type: ID<sub>Cor</sub>)  
Symmetry C<sub>6v</sub>  
Energy MP2 = -3492.870486 au  
Standard Orientation

|    |   |           |           |           |
|----|---|-----------|-----------|-----------|
| 6  | 0 | 0.710813  | 1.231164  | -0.680842 |
| 6  | 0 | -0.710813 | 1.231164  | -0.680842 |
| 6  | 0 | -1.421626 | 0.000000  | -0.680842 |
| 6  | 0 | -0.710813 | -1.231164 | -0.680842 |
| 6  | 0 | 0.710813  | -1.231164 | -0.680842 |
| 6  | 0 | 1.421626  | 0.000000  | -0.680842 |
| 6  | 0 | 1.422504  | 2.463850  | -0.661650 |
| 6  | 0 | 0.688103  | 3.677493  | -0.650078 |
| 6  | 0 | -0.688103 | 3.677493  | -0.650078 |
| 1  | 0 | 1.233350  | 4.618216  | -0.636583 |
| 1  | 0 | -1.233350 | 4.618216  | -0.636583 |
| 6  | 0 | -1.422504 | 2.463850  | -0.661650 |
| 6  | 0 | -2.840751 | 2.434661  | -0.650078 |
| 6  | 0 | -3.528854 | 1.242832  | -0.650078 |
| 1  | 0 | -3.382817 | 3.377220  | -0.636583 |
| 1  | 0 | -4.616167 | 1.240996  | -0.636583 |
| 6  | 0 | -2.845009 | 0.000000  | -0.661650 |
| 6  | 0 | -3.528854 | -1.242832 | -0.650078 |
| 6  | 0 | -2.840751 | -2.434661 | -0.650078 |
| 1  | 0 | -4.616167 | -1.240996 | -0.636583 |
| 1  | 0 | -3.382817 | -3.377220 | -0.636583 |
| 6  | 0 | -1.422504 | -2.463850 | -0.661650 |
| 6  | 0 | -0.688103 | -3.677493 | -0.650078 |
| 6  | 0 | 0.688103  | -3.677493 | -0.650078 |
| 1  | 0 | -1.233350 | -4.618216 | -0.636583 |
| 1  | 0 | 1.233350  | -4.618216 | -0.636583 |
| 6  | 0 | 1.422504  | -2.463850 | -0.661650 |
| 6  | 0 | 2.840751  | -2.434661 | -0.650078 |
| 6  | 0 | 3.528854  | -1.242832 | -0.650078 |
| 1  | 0 | 3.382817  | -3.377220 | -0.636583 |
| 1  | 0 | 4.616167  | -1.240996 | -0.636583 |
| 6  | 0 | 2.845009  | 0.000000  | -0.661650 |
| 6  | 0 | 3.528854  | 1.242832  | -0.650078 |
| 6  | 0 | 2.840751  | 2.434661  | -0.650078 |
| 1  | 0 | 4.616167  | 1.240996  | -0.636583 |
| 1  | 0 | 3.382817  | 3.377220  | -0.636583 |
| 1  | 0 | 0.000000  | 0.000000  | 1.474614  |
| 35 | 0 | 0.000000  | 0.000000  | 2.894277  |

Adduct C<sub>24</sub>H<sub>12</sub>-HI (type: ID<sub>Cor</sub>)  
Symmetry C<sub>6v</sub>  
Energy MP2 = -7838.220220 au

## Standard Orientation

|    |   |           |           |           |
|----|---|-----------|-----------|-----------|
| 6  | 0 | 0.710716  | 1.230997  | -0.975330 |
| 6  | 0 | -0.710716 | 1.230997  | -0.975330 |
| 6  | 0 | -1.421433 | 0.000000  | -0.975330 |
| 6  | 0 | -0.710716 | -1.230997 | -0.975330 |
| 6  | 0 | 0.710716  | -1.230997 | -0.975330 |
| 6  | 0 | 1.421433  | 0.000000  | -0.975330 |
| 6  | 0 | 1.422362  | 2.463604  | -0.953260 |
| 6  | 0 | 0.688114  | 3.677330  | -0.939349 |
| 6  | 0 | -0.688114 | 3.677330  | -0.939349 |
| 1  | 0 | 1.233428  | 4.617997  | -0.923836 |
| 1  | 0 | -1.233428 | 4.617997  | -0.923836 |
| 6  | 0 | -1.422362 | 2.463604  | -0.953260 |
| 6  | 0 | -2.840604 | 2.434589  | -0.939349 |
| 6  | 0 | -3.528718 | 1.242741  | -0.939349 |
| 1  | 0 | -3.382589 | 3.377178  | -0.923836 |
| 1  | 0 | -4.616017 | 1.240819  | -0.923836 |
| 6  | 0 | -2.844725 | 0.000000  | -0.953260 |
| 6  | 0 | -3.528718 | -1.242741 | -0.939349 |
| 6  | 0 | -2.840604 | -2.434589 | -0.939349 |
| 1  | 0 | -4.616017 | -1.240819 | -0.923836 |
| 1  | 0 | -3.382589 | -3.377178 | -0.923836 |
| 6  | 0 | -1.422362 | -2.463604 | -0.953260 |
| 6  | 0 | -0.688114 | -3.677330 | -0.939349 |
| 6  | 0 | 0.688114  | -3.677330 | -0.939349 |
| 1  | 0 | -1.233428 | -4.617997 | -0.923836 |
| 1  | 0 | 1.233428  | -4.617997 | -0.923836 |
| 6  | 0 | 1.422362  | -2.463604 | -0.953260 |
| 6  | 0 | 2.840604  | -2.434589 | -0.939349 |
| 6  | 0 | 3.528718  | -1.242741 | -0.939349 |
| 1  | 0 | 3.382589  | -3.377178 | -0.923836 |
| 1  | 0 | 4.616017  | -1.240819 | -0.923836 |
| 6  | 0 | 2.844725  | 0.000000  | -0.953260 |
| 6  | 0 | 3.528718  | 1.242741  | -0.939349 |
| 6  | 0 | 2.840604  | 2.434589  | -0.939349 |
| 1  | 0 | 4.616017  | 1.240819  | -0.923836 |
| 1  | 0 | 3.382589  | 3.377178  | -0.923836 |
| 1  | 0 | 0.000000  | 0.000000  | 1.159503  |
| 53 | 0 | 0.000000  | 0.000000  | 2.773375  |

Adduct C<sub>24</sub>H<sub>12</sub>-F<sub>2</sub> (type: ID<sub>Cor</sub>)  
Symmetry C<sub>6v</sub>  
Energy MP2 = -1118.822131 au  
Standard Orientation

|   |   |           |           |           |
|---|---|-----------|-----------|-----------|
| 6 | 0 | 0.710471  | 1.230571  | -0.361727 |
| 6 | 0 | -0.710471 | 1.230571  | -0.361727 |
| 6 | 0 | -1.420941 | 0.000000  | -0.361727 |
| 6 | 0 | -0.710471 | -1.230571 | -0.361727 |
| 6 | 0 | 0.710471  | -1.230571 | -0.361727 |
| 6 | 0 | 1.420941  | 0.000000  | -0.361727 |
| 6 | 0 | 1.422048  | 2.463059  | -0.354476 |
| 6 | 0 | 0.688019  | 3.677338  | -0.350118 |

|   |   |           |           |           |
|---|---|-----------|-----------|-----------|
| 6 | 0 | -0.688019 | 3.677338  | -0.350118 |
| 1 | 0 | 1.233515  | 4.618103  | -0.345304 |
| 1 | 0 | -1.233515 | 4.618103  | -0.345304 |
| 6 | 0 | -1.422048 | 2.463059  | -0.354476 |
| 6 | 0 | -2.840659 | 2.434511  | -0.350118 |
| 6 | 0 | -3.528678 | 1.242827  | -0.350118 |
| 1 | 0 | -3.382637 | 3.377307  | -0.345304 |
| 1 | 0 | -4.616152 | 1.240796  | -0.345304 |
| 6 | 0 | -2.844096 | 0.000000  | -0.354476 |
| 6 | 0 | -3.528678 | -1.242827 | -0.350118 |
| 6 | 0 | -2.840659 | -2.434511 | -0.350118 |
| 1 | 0 | -4.616152 | -1.240796 | -0.345304 |
| 1 | 0 | -3.382637 | -3.377307 | -0.345304 |
| 6 | 0 | -1.422048 | -2.463059 | -0.354476 |
| 6 | 0 | -0.688019 | -3.677338 | -0.350118 |
| 6 | 0 | 0.688019  | -3.677338 | -0.350118 |
| 1 | 0 | -1.233515 | -4.618103 | -0.345304 |
| 1 | 0 | 1.233515  | -4.618103 | -0.345304 |
| 6 | 0 | 1.422048  | -2.463059 | -0.354476 |
| 6 | 0 | 2.840659  | -2.434511 | -0.350118 |
| 6 | 0 | 3.528678  | -1.242827 | -0.350118 |
| 1 | 0 | 3.382637  | -3.377307 | -0.345304 |
| 1 | 0 | 4.616152  | -1.240796 | -0.345304 |
| 6 | 0 | 2.844096  | 0.000000  | -0.354476 |
| 6 | 0 | 3.528678  | 1.242827  | -0.350118 |
| 6 | 0 | 2.840659  | 2.434511  | -0.350118 |
| 1 | 0 | 4.616152  | 1.240796  | -0.345304 |
| 1 | 0 | 3.382637  | 3.377307  | -0.345304 |
| 9 | 0 | 0.000000  | 0.000000  | 2.361706  |
| 9 | 0 | 0.000000  | 0.000000  | 3.764450  |

Adduct  
Symmetry  
Energy  
Standard Orientation

C<sub>24</sub>H<sub>12</sub>-Cl<sub>2</sub> (type: ID<sub>Cor</sub>)  
C<sub>6v</sub>  
MP2 = -1838.920129 au

|   |   |           |           |           |
|---|---|-----------|-----------|-----------|
| 6 | 0 | 0.710551  | 1.230711  | -0.722943 |
| 6 | 0 | -0.710551 | 1.230711  | -0.722943 |
| 6 | 0 | -1.421102 | 0.000000  | -0.722943 |
| 6 | 0 | -0.710551 | -1.230711 | -0.722943 |
| 6 | 0 | 0.710551  | -1.230711 | -0.722943 |
| 6 | 0 | 1.421102  | 0.000000  | -0.722943 |
| 6 | 0 | 1.422022  | 2.463014  | -0.699651 |
| 6 | 0 | 0.688053  | 3.677039  | -0.684643 |
| 6 | 0 | -0.688053 | 3.677039  | -0.684643 |
| 1 | 0 | 1.233554  | 4.617662  | -0.668431 |
| 1 | 0 | -1.233554 | 4.617662  | -0.668431 |
| 6 | 0 | -1.422022 | 2.463014  | -0.699651 |
| 6 | 0 | -2.840383 | 2.434391  | -0.684643 |
| 6 | 0 | -3.528436 | 1.242648  | -0.684643 |
| 1 | 0 | -3.382236 | 3.377120  | -0.668431 |
| 1 | 0 | -4.615790 | 1.240542  | -0.668431 |
| 6 | 0 | -2.844044 | 0.000000  | -0.699651 |

|    |   |           |           |           |
|----|---|-----------|-----------|-----------|
| 6  | 0 | -3.528436 | -1.242648 | -0.684643 |
| 6  | 0 | -2.840383 | -2.434391 | -0.684643 |
| 1  | 0 | -4.615790 | -1.240542 | -0.668431 |
| 1  | 0 | -3.382236 | -3.377120 | -0.668431 |
| 6  | 0 | -1.422022 | -2.463014 | -0.699651 |
| 6  | 0 | -0.688053 | -3.677039 | -0.684643 |
| 6  | 0 | 0.688053  | -3.677039 | -0.684643 |
| 1  | 0 | -1.233554 | -4.617662 | -0.668431 |
| 1  | 0 | 1.233554  | -4.617662 | -0.668431 |
| 6  | 0 | 1.422022  | -2.463014 | -0.699651 |
| 6  | 0 | 2.840383  | -2.434391 | -0.684643 |
| 6  | 0 | 3.528436  | -1.242648 | -0.684643 |
| 1  | 0 | 3.382236  | -3.377120 | -0.668431 |
| 1  | 0 | 4.615790  | -1.240542 | -0.668431 |
| 6  | 0 | 2.844044  | 0.000000  | -0.699651 |
| 6  | 0 | 3.528436  | 1.242648  | -0.684643 |
| 6  | 0 | 2.840383  | 2.434391  | -0.684643 |
| 1  | 0 | 4.615790  | 1.240542  | -0.668431 |
| 1  | 0 | 3.382236  | 3.377120  | -0.668431 |
| 17 | 0 | 0.000000  | 0.000000  | 2.196361  |
| 17 | 0 | 0.000000  | 0.000000  | 4.187687  |

Adduct  
Symmetry  
Energy  
Standard Orientation

C<sub>24</sub>H<sub>12</sub>-Br<sub>2</sub> (type: ID<sub>Cor</sub>)  
C<sub>6v</sub>  
MP2 = -6064.982882 au

|   |   |           |           |           |
|---|---|-----------|-----------|-----------|
| 6 | 0 | 0.710668  | 1.230913  | -1.306422 |
| 6 | 0 | -0.710668 | 1.230913  | -1.306422 |
| 6 | 0 | -1.421336 | 0.000000  | -1.306422 |
| 6 | 0 | -0.710668 | -1.230913 | -1.306422 |
| 6 | 0 | 0.710668  | -1.230913 | -1.306422 |
| 6 | 0 | 1.421336  | 0.000000  | -1.306422 |
| 6 | 0 | 1.422115  | 2.463175  | -1.279876 |
| 6 | 0 | 0.688079  | 3.677078  | -1.262392 |
| 6 | 0 | -0.688079 | 3.677078  | -1.262392 |
| 1 | 0 | 1.233542  | 4.617670  | -1.243600 |
| 1 | 0 | -1.233542 | 4.617670  | -1.243600 |
| 6 | 0 | -1.422115 | 2.463175  | -1.279876 |
| 6 | 0 | -2.840403 | 2.434433  | -1.262392 |
| 6 | 0 | -3.528482 | 1.242645  | -1.262392 |
| 1 | 0 | -3.382249 | 3.377114  | -1.243600 |
| 1 | 0 | -4.615791 | 1.240556  | -1.243600 |
| 6 | 0 | -2.844230 | 0.000000  | -1.279876 |
| 6 | 0 | -3.528482 | -1.242645 | -1.262392 |
| 6 | 0 | -2.840403 | -2.434433 | -1.262392 |
| 1 | 0 | -4.615791 | -1.240556 | -1.243600 |
| 1 | 0 | -3.382249 | -3.377114 | -1.243600 |
| 6 | 0 | -1.422115 | -2.463175 | -1.279876 |
| 6 | 0 | -0.688079 | -3.677078 | -1.262392 |
| 6 | 0 | 0.688079  | -3.677078 | -1.262392 |
| 1 | 0 | -1.233542 | -4.617670 | -1.243600 |
| 1 | 0 | 1.233542  | -4.617670 | -1.243600 |

|    |   |          |           |           |
|----|---|----------|-----------|-----------|
| 6  | 0 | 1.422115 | -2.463175 | -1.279876 |
| 6  | 0 | 2.840403 | -2.434433 | -1.262392 |
| 6  | 0 | 3.528482 | -1.242645 | -1.262392 |
| 1  | 0 | 3.382249 | -3.377114 | -1.243600 |
| 1  | 0 | 4.615791 | -1.240556 | -1.243600 |
| 6  | 0 | 2.844230 | 0.000000  | -1.279876 |
| 6  | 0 | 3.528482 | 1.242645  | -1.262392 |
| 6  | 0 | 2.840403 | 2.434433  | -1.262392 |
| 1  | 0 | 4.615791 | 1.240556  | -1.243600 |
| 1  | 0 | 3.382249 | 3.377114  | -1.243600 |
| 35 | 0 | 0.000000 | 0.000000  | 1.702674  |
| 35 | 0 | 0.000000 | 0.000000  | 3.980817  |

Adduct C<sub>24</sub>H<sub>12</sub>-I<sub>2</sub> (type: ID<sub>Cor</sub>)  
Symmetry C<sub>6v</sub>  
Energy MP2 = -14755.721007 au  
Standard Orientation

|   |   |           |           |           |
|---|---|-----------|-----------|-----------|
| 6 | 0 | 0.710707  | 1.230981  | -1.825873 |
| 6 | 0 | -0.710707 | 1.230981  | -1.825873 |
| 6 | 0 | -1.421414 | 0.000000  | -1.825873 |
| 6 | 0 | -0.710707 | -1.230981 | -1.825873 |
| 6 | 0 | 0.710707  | -1.230981 | -1.825873 |
| 6 | 0 | 1.421414  | 0.000000  | -1.825873 |
| 6 | 0 | 1.422079  | 2.463113  | -1.794779 |
| 6 | 0 | 0.688098  | 3.676879  | -1.773425 |
| 6 | 0 | -0.688098 | 3.676879  | -1.773425 |
| 1 | 0 | 1.233569  | 4.617365  | -1.750967 |
| 1 | 0 | -1.233569 | 4.617365  | -1.750967 |
| 6 | 0 | -1.422079 | 2.463113  | -1.794779 |
| 6 | 0 | -2.840222 | 2.434350  | -1.773425 |
| 6 | 0 | -3.528320 | 1.242529  | -1.773425 |
| 1 | 0 | -3.381971 | 3.376985  | -1.750967 |
| 1 | 0 | -4.615540 | 1.240380  | -1.750967 |
| 6 | 0 | -2.844158 | 0.000000  | -1.794779 |
| 6 | 0 | -3.528320 | -1.242529 | -1.773425 |
| 6 | 0 | -2.840222 | -2.434350 | -1.773425 |
| 1 | 0 | -4.615540 | -1.240380 | -1.750967 |
| 1 | 0 | -3.381971 | -3.376985 | -1.750967 |
| 6 | 0 | -1.422079 | -2.463113 | -1.794779 |
| 6 | 0 | -0.688098 | -3.676879 | -1.773425 |
| 6 | 0 | 0.688098  | -3.676879 | -1.773425 |
| 1 | 0 | -1.233569 | -4.617365 | -1.750967 |
| 1 | 0 | 1.233569  | -4.617365 | -1.750967 |
| 6 | 0 | 1.422079  | -2.463113 | -1.794779 |
| 6 | 0 | 2.840222  | -2.434350 | -1.773425 |
| 6 | 0 | 3.528320  | -1.242529 | -1.773425 |
| 1 | 0 | 3.381971  | -3.376985 | -1.750967 |
| 1 | 0 | 4.615540  | -1.240380 | -1.750967 |
| 6 | 0 | 2.844158  | 0.000000  | -1.794779 |
| 6 | 0 | 3.528320  | 1.242529  | -1.773425 |
| 6 | 0 | 2.840222  | 2.434350  | -1.773425 |
| 1 | 0 | 4.615540  | 1.240380  | -1.750967 |

|    |   |          |          |           |
|----|---|----------|----------|-----------|
| 1  | 0 | 3.381971 | 3.376985 | -1.750967 |
| 53 | 0 | 0.000000 | 0.000000 | 1.299359  |
| 53 | 0 | 0.000000 | 0.000000 | 3.965578  |

Adduct C<sub>24</sub>H<sub>12</sub>-ClF (type: ID<sub>Cor</sub>)  
Symmetry C<sub>6v</sub>  
Energy MP2 = -1478.897820 au  
Standard Orientation

|    |   |           |           |           |
|----|---|-----------|-----------|-----------|
| 6  | 0 | 0.710708  | 1.230983  | -0.523200 |
| 6  | 0 | -0.710708 | 1.230983  | -0.523200 |
| 6  | 0 | -1.421417 | 0.000000  | -0.523200 |
| 6  | 0 | -0.710708 | -1.230983 | -0.523200 |
| 6  | 0 | 0.710708  | -1.230983 | -0.523200 |
| 6  | 0 | 1.421417  | 0.000000  | -0.523200 |
| 6  | 0 | 1.422232  | 2.463378  | -0.502886 |
| 6  | 0 | 0.688061  | 3.677287  | -0.490015 |
| 6  | 0 | -0.688061 | 3.677287  | -0.490015 |
| 1  | 0 | 1.233425  | 4.617978  | -0.475811 |
| 1  | 0 | -1.233425 | 4.617978  | -0.475811 |
| 6  | 0 | -1.422232 | 2.463378  | -0.502886 |
| 6  | 0 | -2.840593 | 2.434522  | -0.490015 |
| 6  | 0 | -3.528654 | 1.242765  | -0.490015 |
| 1  | 0 | -3.382574 | 3.377166  | -0.475811 |
| 1  | 0 | -4.615999 | 1.240812  | -0.475811 |
| 6  | 0 | -2.844464 | 0.000000  | -0.502886 |
| 6  | 0 | -3.528654 | -1.242765 | -0.490015 |
| 6  | 0 | -2.840593 | -2.434522 | -0.490015 |
| 1  | 0 | -4.615999 | -1.240812 | -0.475811 |
| 1  | 0 | -3.382574 | -3.377166 | -0.475811 |
| 6  | 0 | -1.422232 | -2.463378 | -0.502886 |
| 6  | 0 | -0.688061 | -3.677287 | -0.490015 |
| 6  | 0 | 0.688061  | -3.677287 | -0.490015 |
| 1  | 0 | -1.233425 | -4.617978 | -0.475811 |
| 1  | 0 | 1.233425  | -4.617978 | -0.475811 |
| 6  | 0 | 1.422232  | -2.463378 | -0.502886 |
| 6  | 0 | 2.840593  | -2.434522 | -0.490015 |
| 6  | 0 | 3.528654  | -1.242765 | -0.490015 |
| 1  | 0 | 3.382574  | -3.377166 | -0.475811 |
| 1  | 0 | 4.615999  | -1.240812 | -0.475811 |
| 6  | 0 | 2.844464  | 0.000000  | -0.502886 |
| 6  | 0 | 3.528654  | 1.242765  | -0.490015 |
| 6  | 0 | 2.840593  | 2.434522  | -0.490015 |
| 1  | 0 | 4.615999  | 1.240812  | -0.475811 |
| 1  | 0 | 3.382574  | 3.377166  | -0.475811 |
| 17 | 0 | 0.000000  | 0.000000  | 2.428378  |
| 9  | 0 | 0.000000  | 0.000000  | 4.071945  |

Adduct C<sub>24</sub>H<sub>12</sub>-BrF (type: ID<sub>Cor</sub>)  
Symmetry C<sub>6v</sub>  
Energy MP2 = -3591.937507 au  
Standard Orientation



|    |   |           |           |           |
|----|---|-----------|-----------|-----------|
| 6  | 0 | 0.710856  | 1.231239  | -0.763966 |
| 6  | 0 | -0.710856 | 1.231239  | -0.763966 |
| 6  | 0 | -1.421712 | 0.000000  | -0.763966 |
| 6  | 0 | -0.710856 | -1.231239 | -0.763966 |
| 6  | 0 | 0.710856  | -1.231239 | -0.763966 |
| 6  | 0 | 1.421712  | 0.000000  | -0.763966 |
| 6  | 0 | 1.422323  | 2.463535  | -0.739574 |
| 6  | 0 | 0.688075  | 3.677283  | -0.723615 |
| 6  | 0 | -0.688075 | 3.677283  | -0.723615 |
| 1  | 0 | 1.233386  | 4.617922  | -0.706167 |
| 1  | 0 | -1.233386 | 4.617922  | -0.706167 |
| 6  | 0 | -1.422323 | 2.463535  | -0.739574 |
| 6  | 0 | -2.840583 | 2.434532  | -0.723615 |
| 6  | 0 | -3.528658 | 1.242751  | -0.723615 |
| 1  | 0 | -3.382545 | 3.377105  | -0.706167 |
| 1  | 0 | -4.615931 | 1.240817  | -0.706167 |
| 6  | 0 | -2.844645 | 0.000000  | -0.739574 |
| 6  | 0 | -3.528658 | -1.242751 | -0.723615 |
| 6  | 0 | -2.840583 | -2.434532 | -0.723615 |
| 1  | 0 | -4.615931 | -1.240817 | -0.706167 |
| 1  | 0 | -3.382545 | -3.377105 | -0.706167 |
| 6  | 0 | -1.422323 | -2.463535 | -0.739574 |
| 6  | 0 | -0.688075 | -3.677283 | -0.723615 |
| 6  | 0 | 0.688075  | -3.677283 | -0.723615 |
| 1  | 0 | -1.233386 | -4.617922 | -0.706167 |
| 1  | 0 | 1.233386  | -4.617922 | -0.706167 |
| 6  | 0 | 1.422323  | -2.463535 | -0.739574 |
| 6  | 0 | 2.840583  | -2.434532 | -0.723615 |
| 6  | 0 | 3.528658  | -1.242751 | -0.723615 |
| 1  | 0 | 3.382545  | -3.377105 | -0.706167 |
| 1  | 0 | 4.615931  | -1.240817 | -0.706167 |
| 6  | 0 | 2.844645  | 0.000000  | -0.739574 |
| 6  | 0 | 3.528658  | 1.242751  | -0.723615 |
| 6  | 0 | 2.840583  | 2.434532  | -0.723615 |
| 1  | 0 | 4.615931  | 1.240817  | -0.706167 |
| 1  | 0 | 3.382545  | 3.377105  | -0.706167 |
| 35 | 0 | 0.000000  | 0.000000  | 2.243255  |
| 9  | 0 | 0.000000  | 0.000000  | 4.020871  |

Adduct  
Symmetry  
Energy  
Standard Orientation

C<sub>24</sub>H<sub>12</sub>-IF (type: ID<sub>Cor</sub>)  
C<sub>6v</sub>  
MP2 = -7937.325535 au

|   |   |           |           |           |
|---|---|-----------|-----------|-----------|
| 6 | 0 | -1.231424 | 0.710963  | -0.983954 |
| 6 | 0 | -1.231424 | -0.710963 | -0.983954 |
| 6 | 0 | 0.000000  | -1.421926 | -0.983954 |
| 6 | 0 | 1.231424  | -0.710963 | -0.983954 |
| 6 | 0 | 1.231424  | 0.710963  | -0.983954 |
| 6 | 0 | 0.000000  | 1.421926  | -0.983954 |
| 6 | 0 | -2.463518 | 1.422313  | -0.954384 |
| 6 | 0 | -3.677030 | 0.688081  | -0.933838 |
| 6 | 0 | -3.677030 | -0.688081 | -0.933838 |

|    |   |           |           |           |
|----|---|-----------|-----------|-----------|
| 1  | 0 | -4.617551 | 1.233367  | -0.911877 |
| 1  | 0 | -4.617551 | -1.233367 | -0.911877 |
| 6  | 0 | -2.463518 | -1.422313 | -0.954384 |
| 6  | 0 | -2.434410 | -2.840360 | -0.933838 |
| 6  | 0 | -1.242619 | -3.528442 | -0.933838 |
| 1  | 0 | -3.376903 | -3.382233 | -0.911877 |
| 1  | 0 | -1.240648 | -4.615600 | -0.911877 |
| 6  | 0 | 0.000000  | -2.844625 | -0.954384 |
| 6  | 0 | 1.242619  | -3.528442 | -0.933838 |
| 6  | 0 | 2.434410  | -2.840360 | -0.933838 |
| 1  | 0 | 1.240648  | -4.615600 | -0.911877 |
| 1  | 0 | 3.376903  | -3.382233 | -0.911877 |
| 6  | 0 | 2.463518  | -1.422313 | -0.954384 |
| 6  | 0 | 3.677030  | -0.688081 | -0.933838 |
| 6  | 0 | 3.677030  | 0.688081  | -0.933838 |
| 1  | 0 | 4.617551  | -1.233367 | -0.911877 |
| 1  | 0 | 4.617551  | 1.233367  | -0.911877 |
| 6  | 0 | 2.463518  | 1.422313  | -0.954384 |
| 6  | 0 | 2.434410  | 2.840360  | -0.933838 |
| 6  | 0 | 1.242619  | 3.528442  | -0.933838 |
| 1  | 0 | 3.376903  | 3.382233  | -0.911877 |
| 1  | 0 | 1.240648  | 4.615600  | -0.911877 |
| 6  | 0 | 0.000000  | 2.844625  | -0.954384 |
| 6  | 0 | -1.242619 | 3.528442  | -0.933838 |
| 6  | 0 | -2.434410 | 2.840360  | -0.933838 |
| 1  | 0 | -1.240648 | 4.615600  | -0.911877 |
| 1  | 0 | -3.376903 | 3.382233  | -0.911877 |
| 53 | 0 | 0.000000  | 0.000000  | 2.105807  |
| 9  | 0 | 0.000000  | 0.000000  | 4.039033  |

Adduct C<sub>6</sub>H<sub>6</sub>  
Symmetry D<sub>6h</sub>  
Energy MP2 = -231.622427 au  
Standard Orientation

|   |   |           |           |          |
|---|---|-----------|-----------|----------|
| 6 | 0 | 0.000000  | 1.395330  | 0.000000 |
| 6 | 0 | 1.208391  | 0.697665  | 0.000000 |
| 6 | 0 | 1.208391  | -0.697665 | 0.000000 |
| 6 | 0 | 0.000000  | -1.395330 | 0.000000 |
| 6 | 0 | -1.208391 | -0.697665 | 0.000000 |
| 6 | 0 | -1.208391 | 0.697665  | 0.000000 |
| 1 | 0 | 0.000000  | 2.480666  | 0.000000 |
| 1 | 0 | 2.148320  | 1.240333  | 0.000000 |
| 1 | 0 | 2.148320  | -1.240333 | 0.000000 |
| 1 | 0 | 0.000000  | -2.480666 | 0.000000 |
| 1 | 0 | -2.148320 | -1.240333 | 0.000000 |
| 1 | 0 | -2.148320 | 1.240333  | 0.000000 |

Adduct C<sub>6</sub>H<sub>6</sub>-HF (type: ID<sub>Bzn</sub>)  
Symmetry C<sub>6v</sub>  
Energy MP2 = -331.958210 au  
Standard Orientation

|   |   |           |           |           |
|---|---|-----------|-----------|-----------|
| 6 | 0 | 0.000000  | 1.396596  | -0.588618 |
| 6 | 0 | 1.209488  | 0.698298  | -0.588618 |
| 6 | 0 | -1.209488 | 0.698298  | -0.588618 |
| 6 | 0 | 1.209488  | -0.698298 | -0.588618 |
| 6 | 0 | -1.209488 | -0.698298 | -0.588618 |
| 6 | 0 | 0.000000  | -1.396596 | -0.588618 |
| 1 | 0 | 0.000000  | 2.481468  | -0.578677 |
| 1 | 0 | 2.149014  | 1.240734  | -0.578677 |
| 1 | 0 | -2.149014 | 1.240734  | -0.578677 |
| 1 | 0 | 2.149014  | -1.240734 | -0.578677 |
| 1 | 0 | -2.149014 | -1.240734 | -0.578677 |
| 1 | 0 | 0.000000  | -2.481468 | -0.578677 |
| 1 | 0 | 0.000000  | 0.000000  | 1.633724  |
| 9 | 0 | 0.000000  | 0.000000  | 2.558730  |

Adduct C<sub>6</sub>H<sub>6</sub>-HCl (type: ID<sub>Bzn</sub>)  
Symmetry C<sub>6v</sub>  
Energy MP2 = -691.928976 au  
Standard Orientation

|    |   |           |           |           |
|----|---|-----------|-----------|-----------|
| 6  | 0 | 0.000000  | 1.396481  | -1.036932 |
| 6  | 0 | 1.209385  | 0.698241  | -1.036926 |
| 6  | 0 | -1.209385 | 0.698241  | -1.036926 |
| 6  | 0 | 1.209385  | -0.698241 | -1.036926 |
| 6  | 0 | -1.209385 | -0.698241 | -1.036926 |
| 6  | 0 | 0.000000  | -1.396481 | -1.036932 |
| 1  | 0 | 0.000000  | 2.481523  | -1.028256 |
| 1  | 0 | 2.149061  | 1.240757  | -1.028190 |
| 1  | 0 | -2.149061 | 1.240757  | -1.028190 |
| 1  | 0 | 2.149061  | -1.240757 | -1.028190 |
| 1  | 0 | -2.149061 | -1.240757 | -1.028190 |
| 1  | 0 | 0.000000  | -2.481523 | -1.028256 |
| 1  | 0 | 0.000000  | 0.000000  | 1.205240  |
| 17 | 0 | 0.000000  | 0.000000  | 2.487850  |

Adduct C<sub>6</sub>H<sub>6</sub>-HBr (type: ID<sub>Bzn</sub>)  
Symmetry C<sub>6v</sub>  
Energy MP2 = -2804.942234 au  
Standard Orientation

|   |   |           |           |           |
|---|---|-----------|-----------|-----------|
| 6 | 0 | 0.000000  | 1.396439  | -1.681325 |
| 6 | 0 | 1.209352  | 0.698219  | -1.681325 |
| 6 | 0 | -1.209352 | 0.698220  | -1.681325 |
| 6 | 0 | 1.209352  | -0.698220 | -1.681325 |
| 6 | 0 | -1.209352 | -0.698220 | -1.681325 |
| 6 | 0 | 0.000000  | -1.396439 | -1.681325 |
| 1 | 0 | 0.000000  | 2.481546  | -1.673814 |
| 1 | 0 | 2.149082  | 1.240773  | -1.673814 |
| 1 | 0 | -2.149082 | 1.240773  | -1.673814 |
| 1 | 0 | 2.149082  | -1.240773 | -1.673814 |
| 1 | 0 | -2.149082 | -1.240773 | -1.673814 |
| 1 | 0 | 0.000000  | -2.481546 | -1.673814 |
| 1 | 0 | 0.000000  | 0.000000  | 0.579190  |

|    |   |          |          |          |
|----|---|----------|----------|----------|
| 35 | 0 | 0.000000 | 0.000000 | 1.999754 |
|----|---|----------|----------|----------|

Adduct C<sub>6</sub>H<sub>6</sub>-HI (type: ID<sub>Bzn</sub>)  
Symmetry C<sub>6v</sub>  
Energy MP2 = -7150.290414 au  
Standard Orientation

|    |   |           |           |           |
|----|---|-----------|-----------|-----------|
| 6  | 0 | 0.000000  | 1.396244  | -2.171691 |
| 6  | 0 | 1.209183  | 0.698122  | -2.171691 |
| 6  | 0 | -1.209183 | 0.698122  | -2.171691 |
| 6  | 0 | 1.209183  | -0.698122 | -2.171691 |
| 6  | 0 | -1.209183 | -0.698122 | -2.171691 |
| 6  | 0 | 0.000000  | -1.396244 | -2.171691 |
| 1  | 0 | 0.000000  | 2.481421  | -2.165441 |
| 1  | 0 | 2.148974  | 1.240711  | -2.165441 |
| 1  | 0 | -2.148974 | 1.240711  | -2.165441 |
| 1  | 0 | 2.148974  | -1.240711 | -2.165441 |
| 1  | 0 | -2.148974 | -1.240711 | -2.165441 |
| 1  | 0 | 0.000000  | -2.481421 | -2.165441 |
| 1  | 0 | 0.000000  | 0.000000  | 0.103172  |
| 53 | 0 | 0.000000  | 0.000000  | 1.718308  |

Adduct C<sub>6</sub>H<sub>6</sub>-F<sub>2</sub> (type: ID<sub>Bzn</sub>)  
Symmetry C<sub>6v</sub>  
Energy MP2 = -430.893808 au  
Standard Orientation

|   |   |           |           |           |
|---|---|-----------|-----------|-----------|
| 6 | 0 | 0.000000  | 1.395506  | -1.081674 |
| 6 | 0 | 1.208544  | 0.697753  | -1.081674 |
| 6 | 0 | -1.208544 | 0.697753  | -1.081674 |
| 6 | 0 | 1.208544  | -0.697753 | -1.081674 |
| 6 | 0 | -1.208544 | -0.697753 | -1.081674 |
| 6 | 0 | 0.000000  | -1.395506 | -1.081674 |
| 1 | 0 | 0.000000  | 2.480841  | -1.079006 |
| 1 | 0 | 2.148471  | 1.240420  | -1.079006 |
| 1 | 0 | -2.148471 | 1.240420  | -1.079006 |
| 1 | 0 | 2.148471  | -1.240421 | -1.079006 |
| 1 | 0 | -2.148471 | -1.240420 | -1.079006 |
| 1 | 0 | 0.000000  | -2.480841 | -1.079006 |
| 9 | 0 | 0.000000  | 0.000000  | 1.822378  |
| 9 | 0 | 0.000000  | 0.000000  | 3.223656  |

Adduct C<sub>6</sub>H<sub>6</sub>-Cl<sub>2</sub> (type: ID<sub>Bzn</sub>)  
Symmetry C<sub>6v</sub>  
Energy MP2 = -1150.988862 au  
Standard Orientation

|   |   |           |           |           |
|---|---|-----------|-----------|-----------|
| 6 | 0 | 0.000000  | 1.395972  | -1.835061 |
| 6 | 0 | 1.208947  | 0.697986  | -1.835061 |
| 6 | 0 | -1.208947 | 0.697986  | -1.835061 |
| 6 | 0 | 1.208947  | -0.697986 | -1.835061 |
| 6 | 0 | -1.208947 | -0.697986 | -1.835061 |
| 6 | 0 | 0.000000  | -1.395972 | -1.835061 |
| 1 | 0 | 0.000000  | 2.481280  | -1.829306 |

|    |   |           |           |           |
|----|---|-----------|-----------|-----------|
| 1  | 0 | 2.148852  | 1.240640  | -1.829306 |
| 1  | 0 | -2.148852 | 1.240640  | -1.829306 |
| 1  | 0 | 2.148852  | -1.240640 | -1.829306 |
| 1  | 0 | -2.148852 | -1.240640 | -1.829306 |
| 1  | 0 | 0.000000  | -2.481280 | -1.829306 |
| 17 | 0 | 0.000000  | 0.000000  | 1.270776  |
| 17 | 0 | 0.000000  | 0.000000  | 3.260874  |

Adduct C<sub>6</sub>H<sub>6</sub>-Br<sub>2</sub> (type: ID<sub>Bzn</sub>)  
Symmetry C<sub>6v</sub>  
Energy MP2 = -5377.050710 au  
Standard Orientation

|    |   |           |           |           |
|----|---|-----------|-----------|-----------|
| 6  | 0 | 0.000000  | 1.396194  | -2.727293 |
| 6  | 0 | 1.209139  | 0.698097  | -2.727293 |
| 6  | 0 | -1.209139 | 0.698097  | -2.727293 |
| 6  | 0 | 1.209139  | -0.698097 | -2.727293 |
| 6  | 0 | -1.209139 | -0.698097 | -2.727293 |
| 6  | 0 | 0.000000  | -1.396194 | -2.727293 |
| 1  | 0 | 0.000000  | 2.481520  | -2.722577 |
| 1  | 0 | 2.149059  | 1.240760  | -2.722577 |
| 1  | 0 | -2.149059 | 1.240760  | -2.722577 |
| 1  | 0 | 2.149059  | -1.240760 | -2.722577 |
| 1  | 0 | -2.149059 | -1.240760 | -2.722577 |
| 1  | 0 | 0.000000  | -2.481520 | -2.722577 |
| 35 | 0 | 0.000000  | 0.000000  | 0.498281  |
| 35 | 0 | 0.000000  | 0.000000  | 2.773662  |

Adduct C<sub>6</sub>H<sub>6</sub>-I<sub>2</sub> (type: ID<sub>Bzn</sub>)  
Symmetry C<sub>6v</sub>  
Energy MP2 = -14067.786555 au  
Standard Orientation

|    |   |           |           |           |
|----|---|-----------|-----------|-----------|
| 6  | 0 | 0.000000  | 1.396238  | -3.370057 |
| 6  | 0 | 1.209178  | 0.698119  | -3.370057 |
| 6  | 0 | -1.209178 | 0.698119  | -3.370057 |
| 6  | 0 | 1.209178  | -0.698119 | -3.370057 |
| 6  | 0 | -1.209178 | -0.698119 | -3.370057 |
| 6  | 0 | 0.000000  | -1.396238 | -3.370057 |
| 1  | 0 | 0.000000  | 2.481534  | -3.365425 |
| 1  | 0 | 2.149071  | 1.240767  | -3.365425 |
| 1  | 0 | -2.149071 | 1.240767  | -3.365425 |
| 1  | 0 | 2.149071  | -1.240767 | -3.365425 |
| 1  | 0 | -2.149071 | -1.240767 | -3.365425 |
| 1  | 0 | 0.000000  | -2.481534 | -3.365425 |
| 53 | 0 | 0.000000  | 0.000000  | 0.003905  |
| 53 | 0 | 0.000000  | 0.000000  | 2.666182  |

Adduct C<sub>6</sub>H<sub>6</sub>-ClF (type: ID<sub>Bzn</sub>)  
Symmetry C<sub>6v</sub>  
Energy MP2 = -790.968094 au  
Standard Orientation

|   |   |          |          |           |
|---|---|----------|----------|-----------|
| 6 | 0 | 0.000000 | 1.396172 | -1.411154 |
|---|---|----------|----------|-----------|

|    |   |           |           |           |
|----|---|-----------|-----------|-----------|
| 6  | 0 | 1.209120  | 0.698086  | -1.411154 |
| 6  | 0 | -1.209120 | 0.698086  | -1.411154 |
| 6  | 0 | 1.209120  | -0.698086 | -1.411154 |
| 6  | 0 | -1.209120 | -0.698086 | -1.411154 |
| 6  | 0 | 0.000000  | -1.396172 | -1.411154 |
| 1  | 0 | 0.000000  | 2.481406  | -1.405287 |
| 1  | 0 | 2.148961  | 1.240703  | -1.405287 |
| 1  | 0 | -2.148961 | 1.240703  | -1.405287 |
| 1  | 0 | 2.148961  | -1.240703 | -1.405287 |
| 1  | 0 | -2.148961 | -1.240703 | -1.405287 |
| 1  | 0 | 0.000000  | -2.481406 | -1.405287 |
| 17 | 0 | 0.000000  | 0.000000  | 1.709828  |
| 9  | 0 | 0.000000  | 0.000000  | 3.351799  |

Adduct C<sub>6</sub>H<sub>6</sub>-BrF (type: ID<sub>Bzn</sub>)  
Symmetry C<sub>6v</sub>  
Energy MP2 = -2904.006822 au  
Standard Orientation

|    |   |           |           |           |
|----|---|-----------|-----------|-----------|
| 6  | 0 | 0.000000  | 1.396442  | -1.825225 |
| 6  | 0 | 1.209354  | 0.698221  | -1.825225 |
| 6  | 0 | -1.209354 | 0.698221  | -1.825225 |
| 6  | 0 | 1.209354  | -0.698221 | -1.825225 |
| 6  | 0 | -1.209354 | -0.698221 | -1.825225 |
| 6  | 0 | 0.000000  | -1.396442 | -1.825225 |
| 1  | 0 | 0.000000  | 2.481654  | -1.819727 |
| 1  | 0 | 2.149175  | 1.240827  | -1.819727 |
| 1  | 0 | -2.149175 | 1.240827  | -1.819727 |
| 1  | 0 | 2.149175  | -1.240827 | -1.819727 |
| 1  | 0 | -2.149175 | -1.240827 | -1.819727 |
| 1  | 0 | 0.000000  | -2.481654 | -1.819727 |
| 35 | 0 | 0.000000  | 0.000000  | 1.378483  |
| 9  | 0 | 0.000000  | 0.000000  | 3.153286  |

Adduct C<sub>6</sub>H<sub>6</sub>-IF (type: ID<sub>Bzn</sub>)  
Symmetry C<sub>6v</sub>  
Energy MP2 = -7249.392607 au  
Standard Orientation

|    |   |           |           |           |
|----|---|-----------|-----------|-----------|
| 6  | 0 | 0.000000  | 1.396577  | -2.145721 |
| 6  | 0 | 1.209471  | 0.698288  | -2.145721 |
| 6  | 0 | -1.209471 | 0.698288  | -2.145721 |
| 6  | 0 | 1.209471  | -0.698288 | -2.145721 |
| 6  | 0 | -1.209471 | -0.698288 | -2.145721 |
| 6  | 0 | 0.000000  | -1.396577 | -2.145721 |
| 1  | 0 | 0.000000  | 2.481720  | -2.138921 |
| 1  | 0 | 2.149233  | 1.240860  | -2.138921 |
| 1  | 0 | -2.149233 | 1.240860  | -2.138921 |
| 1  | 0 | 2.149233  | -1.240860 | -2.138921 |
| 1  | 0 | -2.149233 | -1.240860 | -2.138921 |
| 1  | 0 | 0.000000  | -2.481720 | -2.138921 |
| 53 | 0 | 0.000000  | 0.000000  | 1.172720  |
| 9  | 0 | 0.000000  | 0.000000  | 3.102812  |
